# Supplementary material for: Mapping the sociodemographic distribution and self-reported justifications for non-compliance with COVID-19 guidelines in the United Kingdom
Source: Front Psychol. 2023 Jul 19;14:1183789. doi: 10.3389/fpsyg.2023.1183789 (PMC10395087; doi:10.3389/fpsyg.2023.1183789)
Supplement: Supplementary file 2 [file Table_2.csv]

question	answer	factor	predictor	probability_december2019	probability_june2021	probability_january2022	difference_december_to_june	difference_june_to_january
masks	Yes	age_bucket	age_bucket_18_to_30	0.856331440026729	0.8100752750434279	0.8310249307479224	-0.046256164983301096	0.020949655704494474
masks	Yes	age_bucket	age_bucket_31_to_40	0.8366666666666667	0.7874659400544959	0.7534246575342466	-0.049200726612170786	-0.034041282520249294
masks	Yes	age_bucket	age_bucket_41_to_50	0.8445341794058263	0.7901178603807797	0.7762962962962963	-0.05441631902504662	-0.013821564084483429
masks	Yes	age_bucket	age_bucket_51_to_60	0.8426943005181348	0.7849707221860768	0.8056224899598393	-0.05772357833205799	0.02065176777376254
masks	Yes	age_bucket	age_bucket_61_to_70	0.8763704222066714	0.825560697757209	0.8306916426512968	-0.05080972444946241	0.00513094489408783
masks	Yes	age_bucket	age_bucket_above_70	0.8833333333333333	0.8301886792452831	0.8618556701030928	-0.05314465408805025	0.031666990857809774
masks	Yes	sex	sex_Female	0.8726937269372693	0.8226174190606476	0.8308214016578749	-0.05007630787662176	0.008203982597227322
masks	Yes	sex	sex_Male	0.8349157733537519	0.7789138451223601	0.7839598997493734	-0.05600192823139183	0.005046054627013352
masks	Yes	sex	sex_Other	0.9090909090909091	0.8666666666666667	0.875	-0.042424242424242364	0.008333333333333304
masks	Yes	edu	edu_PhD	0.8917322834645669	0.8382352941176471	0.8348214285714286	-0.05349698934691982	-0.0034138655462184753
masks	Yes	edu	edu_Primary_Elementary_school_or_less	0.8110749185667753	0.7471264367816092	0.7868852459016393	-0.0639484817851661	0.03975880912003016
masks	Yes	edu	edu_Secondary_school_High_school_diploma	0.8364095283167692	0.7820672478206725	0.7858056265984654	-0.054342280496096684	0.003738378777792928
masks	Yes	edu	edu_University_degree	0.8617717478052673	0.8108662224500256	0.8235085227272727	-0.05090552535524173	0.01264230027724711
masks	Yes	ethnicity	ethnicity_American_Hispanic	0.8477011494252874	0.7909604519774012	0.8431372549019608	-0.056740697447886235	0.05217680292455962
masks	Yes	ethnicity	ethnicity_East_Asian	0.8527131782945736	0.8028846153846154	0.78125	-0.049828562909958185	-0.02163461538461542
masks	Yes	ethnicity	ethnicity_Indian_South_Asian_or_South_East_Asian	0.8317073170731707	0.8095238095238095	0.7846153846153846	-0.02218350754936116	-0.02490842490842493
masks	Yes	ethnicity	ethnicity_Mixed_ethnicity	0.8454106280193237	0.8157894736842105	0.8088235294117647	-0.029621154335113142	-0.00696594427244579
masks	Yes	ethnicity	ethnicity_Other	0.8543046357615894	0.8260869565217391	0.7142857142857143	-0.028217679239850302	-0.11180124223602483
masks	Yes	ethnicity	ethnicity_Unknown	0.832	0.8194444444444444	0.9090909090909091	-0.012555555555555542	0.08964646464646464
masks	Yes	ethnicity	ethnicity_White_European_or_North_American	0.8555864247970801	0.8016493428399623	0.8113854595336076	-0.05393708195711788	0.00973611669364538
masks	Yes	residence	residence_Abroad	0.8496583143507973	0.76875	0.8324873096446701	-0.08090831435079726	0.06373730964467006
masks	Yes	residence	residence_United_Kingdom	0.854887417218543	0.8034639175257732	0.8099820948970456	-0.051423499692769825	0.006518177371272471
masks	Yes	occupation	occupation_Disabled_Not_applicable_Sheltered_employment	0.8018018018018018	0.816793893129771	0.813953488372093	0.014992091327969193	-0.0028404047576779945
masks	Yes	occupation	occupation_Homemaker	0.8609406952965235	0.8115501519756839	0.8267716535433071	-0.049390543320839586	0.015221501567623141
masks	Yes	occupation	occupation_Retired	0.87450161382191	0.8258763180393275	0.8388382687927107	-0.04862529578258257	0.012961950753383245
masks	Yes	occupation	occupation_Student	0.8608617594254937	0.8692699490662139	0.849624060150376	0.00840818964072021	-0.01964588891583796
masks	Yes	occupation	occupation_Unemployed_Looking_for_work	0.8283132530120482	0.7647058823529411	0.7452830188679245	-0.06360737065910704	-0.01942286348501665
masks	Yes	occupation	occupation_Unknown	0.8709677419354839	0.6785714285714286	0.9090909090909091	-0.19239631336405527	0.23051948051948046
masks	Yes	occupation	occupation_Worker	0.8474438953252856	0.7876025524156791	0.7906789875451988	-0.05984134290960652	0.0030764351295197168
masks	Yes	has_condition	has_condition_I_have_a_neurological_condition	0.8646864686468647	0.8146453089244852	0.8531073446327684	-0.05004115972237955	0.038462035708283215
masks	Yes	has_condition	has_condition_I_have_a_psychiatric_condition	0.8676307007786429	0.8189116859946476	0.8319327731092437	-0.04871901478399532	0.013021087114596153
masks	Yes	has_condition	has_condition_I_have_both_a_psychiatric_and_a_neurological_condition	0.8244274809160306	0.8478260869565217	0.8484848484848485	0.023398606040491154	0.0006587615283267789
masks	Yes	has_condition	has_condition_No	0.8530894262898567	0.7995435874030123	0.8069790141532455	-0.05354583888684439	0.007435426750233121
masks	Yes	drug_use_frequency	drug_use_frequency_Daily	0.8251121076233184	0.75	0.8055555555555556	-0.07511210762331844	0.05555555555555558
masks	Yes	drug_use_frequency	drug_use_frequency_Less_than_yearly	0.8446507083536883	0.7898989898989899	0.8041362530413625	-0.054751718454698395	0.014237263142372614
masks	Yes	drug_use_frequency	drug_use_frequency_Monthly	0.8556149732620321	0.7844827586206896	0.7719298245614035	-0.07113221464134245	-0.012552934059286147
masks	Yes	drug_use_frequency	drug_use_frequency_Never_used	0.8593106032221806	0.8142683912691997	0.8176823176823177	-0.04504221195298086	0.003413926413117996
masks	Yes	drug_use_frequency	drug_use_frequency_Unknown_use	0.8502747252747253	0.8010215927559786	0.8077403245942572	-0.049253132518746634	0.0067187318382785355
masks	Yes	drug_use_frequency	drug_use_frequency_Weekly	0.7982832618025751	0.7461538461538462	0.7631578947368421	-0.05212941564872897	0.01700404858299598
masks	Yes	drug_use_frequency	drug_use_frequency_Yearly	0.8711656441717791	0.7837150127226463	0.8240740740740741	-0.08745063144913279	0.04035906135142775
masks	Yes	wellbeing_bucket	wellbeing_bucket_high_wellbeing	0.8538080443362163	0.7914069456812111	0.7980295566502463	-0.062401098655005205	0.00662261096903527
masks	Yes	wellbeing_bucket	wellbeing_bucket_low_wellbeing	0.8580645161290322	0.8205659075224293	0.8255813953488372	-0.03749860860660292	0.005015487826407927
masks	Yes	wellbeing_bucket	wellbeing_bucket_medium_wellbeing	0.8551103368176539	0.8053721488595438	0.8181063122923588	-0.049738187958110136	0.012734163432814971
masks	Yes	online_bucket	online_bucket_between_10h_and_14h	0.871900826446281	0.8133748055987559	0.7878787878787878	-0.05852602084752512	-0.02549601771996801
masks	Yes	online_bucket	online_bucket_between_2h_and_4h	0.8555098308184728	0.7990821009688934	0.8030495552731893	-0.05642772984957933	0.003967454304295903
masks	Yes	online_bucket	online_bucket_between_4h_and_6h	0.8621827411167513	0.8064365671641791	0.8300653594771242	-0.0557461739525722	0.023628792312945124
masks	Yes	online_bucket	online_bucket_between_6h_and_8h	0.8525963149078727	0.797776233495483	0.8004385964912281	-0.0548200814123897	0.002662362995745071
masks	Yes	online_bucket	online_bucket_between_8h_and_10h	0.8570520965692503	0.80720871751886	0.8208092485549133	-0.04984337905039027	0.013600531036053298
masks	Yes	online_bucket	online_bucket_less_than_2h	0.8473684210526315	0.8009756097560976	0.8125	-0.04639281129653394	0.011524390243902394
masks	Yes	online_bucket	online_bucket_more_than_14h	0.8005115089514067	0.798941798941799	0.8387096774193549	-0.0015697100096077055	0.03976787847755592
masks	Yes but only because I have to	age_bucket	age_bucket_18_to_30	0.13230872034747745	0.1795020266357846	0.1440443213296399	0.047193306288307146	-0.0354577053061447
masks	Yes but only because I have to	age_bucket	age_bucket_31_to_40	0.152	0.2010899182561308	0.21526418786692758	0.04908991825613079	0.014174269610796791
masks	Yes but only because I have to	age_bucket	age_bucket_41_to_50	0.1468128064609172	0.19628286491387126	0.20296296296296296	0.04947005845295405	0.006680098049091698
masks	Yes but only because I have to	age_bucket	age_bucket_51_to_60	0.14694300518134715	0.20201691607026676	0.1791164658634538	0.05507391088891961	-0.022900450206812945
masks	Yes but only because I have to	age_bucket	age_bucket_61_to_70	0.1145323069745743	0.16269134923460307	0.15489913544668588	0.048159042260028775	-0.007792213787917196
masks	Yes but only because I have to	age_bucket	age_bucket_above_70	0.10617283950617284	0.15828092243186584	0.12371134020618557	0.052108082925692994	-0.03456958222568027
masks	Yes but only because I have to	sex	sex_Female	0.11711011846960574	0.16674266605867152	0.1522230595327807	0.04963254758906578	-0.014519606525890821
masks	Yes but only because I have to	sex	sex_Male	0.15518121490556405	0.2073416024136775	0.19598997493734335	0.05216038750811344	-0.011351627476334142
masks	Yes but only because I have to	sex	sex_Other	0.0707070707070707	0.11666666666666667	0.125	0.045959595959595964	0.008333333333333331
masks	Yes but only because I have to	edu	edu_PhD	0.10137795275590551	0.1503267973856209	0.14285714285714285	0.048948844629715396	-0.007469654528478059
masks	Yes but only because I have to	edu	edu_Primary_Elementary_school_or_less	0.16938110749185667	0.22413793103448276	0.16393442622950818	0.05475682354262609	-0.06020350480497458
masks	Yes but only because I have to	edu	edu_Secondary_school_High_school_diploma	0.1489193879160751	0.2019925280199253	0.19117647058823528	0.0530731401038502	-0.010816057431690007
masks	Yes but only because I have to	edu	edu_University_degree	0.13040702314445332	0.179267042542286	0.16193181818181818	0.04886001939783269	-0.017335224360467832
masks	Yes but only because I have to	ethnicity	ethnicity_American_Hispanic	0.14655172413793102	0.1977401129943503	0.13725490196078433	0.05118838885641927	-0.060485211033565967
masks	Yes but only because I have to	ethnicity	ethnicity_East_Asian	0.14470284237726097	0.1875	0.1875	0.04279715762273903	0.0
masks	Yes but only because I have to	ethnicity	ethnicity_Indian_South_Asian_or_South_East_Asian	0.15853658536585366	0.18095238095238095	0.2	0.022415795586527287	0.019047619047619063
masks	Yes but only because I have to	ethnicity	ethnicity_Mixed_ethnicity	0.14251207729468598	0.17543859649122806	0.19117647058823528	0.032926519196542076	0.01573787409700722
masks	Yes but only because I have to	ethnicity	ethnicity_Other	0.1390728476821192	0.15942028985507245	0.2857142857142857	0.020347442172953256	0.12629399585921325
masks	Yes but only because I have to	ethnicity	ethnicity_Unknown	0.152	0.1527777777777778	0.09090909090909091	0.0007777777777777939	-0.06186868686868688
masks	Yes but only because I have to	ethnicity	ethnicity_White_European_or_North_American	0.13411777523560495	0.18615239240615067	0.1700960219478738	0.05203461717054572	-0.016056370458276875
masks	Yes but only because I have to	residence	residence_Abroad	0.12452543659832954	0.1875	0.15228426395939088	0.06297456340167046	-0.035215736040609125
masks	Yes but only because I have to	residence	residence_United_Kingdom	0.13610596026490066	0.1856494845360825	0.1716651745747538	0.04954352427118183	-0.013984309961328684
masks	Yes but only because I have to	occupation	occupation_Disabled_Not_applicable_Sheltered_employment	0.12162162162162163	0.0916030534351145	0.11627906976744186	-0.030018568186507125	0.024676016332327355
masks	Yes but only because I have to	occupation	occupation_Homemaker	0.11860940695296524	0.1702127659574468	0.13385826771653545	0.05160335900448157	-0.03635449824091136
masks	Yes but only because I have to	occupation	occupation_Retired	0.11676476172394153	0.16300940438871472	0.1480637813211845	0.0462446426647732	-0.014945623067530223
masks	Yes but only because I have to	occupation	occupation_Student	0.12567324955116696	0.12224108658743633	0.13533834586466165	-0.0034321629637306256	0.013097259277225312
masks	Yes but only because I have to	occupation	occupation_Unemployed_Looking_for_work	0.15210843373493976	0.21764705882352942	0.22641509433962265	0.06553862508858965	0.008768035516093231
masks	Yes but only because I have to	occupation	occupation_Unknown	0.10752688172043011	0.25	0.09090909090909091	0.14247311827956988	-0.1590909090909091
masks	Yes but only because I have to	occupation	occupation_Worker	0.1443733290123957	0.2015887485349655	0.189634391321816	0.05721541952256981	-0.011954357213149497
masks	Yes but only because I have to	has_condition	has_condition_I_have_a_neurological_condition	0.10066006600660066	0.14645308924485126	0.1016949152542373	0.0457930232382506	-0.044758173990613964
masks	Yes but only because I have to	has_condition	has_condition_I_have_a_psychiatric_condition	0.11457174638487208	0.16146297948260482	0.12324929971988796	0.04689123309773274	-0.03821367976271686
masks	Yes but only because I have to	has_condition	has_condition_I_have_both_a_psychiatric_and_a_neurological_condition	0.09923664122137404	0.09782608695652174	0.09090909090909091	-0.0014105542648523012	-0.006916996047430832
masks	Yes but only because I have to	has_condition	has_condition_No	0.13892507220932207	0.19050661798265633	0.17862371888726208	0.051581545773334264	-0.01188289909539425
masks	Yes but only because I have to	drug_use_frequency	drug_use_frequency_Daily	0.12556053811659193	0.19166666666666668	0.08333333333333333	0.06610612855007475	-0.10833333333333335
masks	Yes but only because I have to	drug_use_frequency	drug_use_frequency_Less_than_yearly	0.1446018563751832	0.20242424242424242	0.17518248175182483	0.05782238604905923	-0.027241760672417598
masks	Yes but only because I have to	drug_use_frequency	drug_use_frequency_Monthly	0.13368983957219252	0.1939655172413793	0.19298245614035087	0.06027567766918679	-0.000983061101028443
masks	Yes but only because I have to	drug_use_frequency	drug_use_frequency_Never_used	0.13150992881228923	0.17380759902991108	0.16783216783216784	0.04229767021762185	-0.005975431197743242
masks	Yes but only because I have to	drug_use_frequency	drug_use_frequency_Unknown_use	0.13942307692307693	0.18690503830972835	0.17290886392009988	0.04748196138665142	-0.013996174389628468
masks	Yes but only because I have to	drug_use_frequency	drug_use_frequency_Weekly	0.19742489270386265	0.2076923076923077	0.18421052631578946	0.01026741498844505	-0.02348178137651824
masks	Yes but only because I have to	drug_use_frequency	drug_use_frequency_Yearly	0.11901840490797547	0.2035623409669211	0.17592592592592593	0.08454393605894564	-0.027636415040995177
masks	Yes but only because I have to	wellbeing_bucket	wellbeing_bucket_high_wellbeing	0.13846670585271642	0.19991095280498664	0.18500273672687464	0.061444246952270215	-0.014908216078111991
masks	Yes but only because I have to	wellbeing_bucket	wellbeing_bucket_low_wellbeing	0.12114695340501792	0.15942028985507245	0.12790697674418605	0.038273336450054526	-0.0315133131108864
masks	Yes but only because I have to	wellbeing_bucket	wellbeing_bucket_medium_wellbeing	0.1328397212543554	0.18187274909963985	0.16777408637873753	0.04903302784528446	-0.014098662720902322
masks	Yes but only because I have to	online_bucket	online_bucket_between_10h_and_14h	0.11776859504132231	0.17107309486780714	0.1717171717171717	0.05330449982648483	0.0006440768493645721
masks	Yes but only because I have to	online_bucket	online_bucket_between_2h_and_4h	0.133973479652492	0.1891891891891892	0.17852604828462515	0.05521570953669719	-0.01066314090456405
masks	Yes but only because I have to	online_bucket	online_bucket_between_4h_and_6h	0.12614213197969543	0.18003731343283583	0.1503267973856209	0.0538951814531404	-0.02971051604721492
masks	Yes but only because I have to	online_bucket	online_bucket_between_6h_and_8h	0.14112227805695143	0.19179986101459348	0.18201754385964913	0.05067758295764205	-0.009782317154944348
masks	Yes but only because I have to	online_bucket	online_bucket_between_8h_and_10h	0.13468869123252858	0.18524727577535624	0.17630057803468208	0.05055858454282766	-0.008946697740674164
masks	Yes but only because I have to	online_bucket	online_bucket_less_than_2h	0.14347826086956522	0.1856910569105691	0.17009493670886075	0.04221279604100389	-0.015596120201708363
masks	Yes but only because I have to	online_bucket	online_bucket_more_than_14h	0.17135549872122763	0.18518518518518517	0.12903225806451613	0.013829686463957547	-0.05615292712066905
masks	No I am exempt	age_bucket	age_bucket_18_to_30	0.006348145673237555	0.0052113491603937466	0.0110803324099723	-0.001136796512843808	0.005868983249578553
masks	No I am exempt	age_bucket	age_bucket_31_to_40	0.008666666666666666	0.006539509536784741	0.005870841487279843	-0.002127157129881925	-0.0006686680495048983
masks	No I am exempt	age_bucket	age_bucket_41_to_50	0.006345543697721373	0.008159564823209429	0.01037037037037037	0.0018140211254880556	0.0022108055471609413
masks	No I am exempt	age_bucket	age_bucket_51_to_60	0.006010362694300518	0.0068314899154196486	0.004819277108433735	0.0008211272211191304	-0.002012212806985913
masks	No I am exempt	age_bucket	age_bucket_61_to_70	0.00536505714952181	0.006051975792096832	0.007204610951008645	0.0006869186425750217	0.0011526351589118133
masks	No I am exempt	age_bucket	age_bucket_above_70	0.006172839506172839	0.009433962264150943	0.010309278350515464	0.003261122757978104	0.0008753160863645207
masks	No I am exempt	sex	sex_Female	0.007865604971839192	0.006991944064447485	0.008666164280331574	-0.0008736609073917078	0.0016742202158840898
masks	No I am exempt	sex	sex_Male	0.0046962736089841755	0.00670465973851827	0.006015037593984963	0.0020083861295340944	-0.0006896221445333072
masks	No I am exempt	sex	sex_Other	0.020202020202020204	0.0	0.0	-0.020202020202020204	0.0
masks	No I am exempt	edu	edu_PhD	0.002952755905511811	0.006535947712418301	0.013392857142857142	0.00358319180690649	0.006856909430438841
masks	No I am exempt	edu	edu_Primary_Elementary_school_or_less	0.013029315960912053	0.011494252873563218	0.04918032786885246	-0.0015350630873488345	0.03768607499528924
masks	No I am exempt	edu	edu_Secondary_school_High_school_diploma	0.010253983278119577	0.009713574097135741	0.008951406649616368	-0.0005404091809838359	-0.0007621674475193733
masks	No I am exempt	edu	edu_University_degree	0.004549082202713488	0.005253716043054844	0.005326704545454545	0.000704633840341356	7.298850239970123e-05
masks	No I am exempt	ethnicity	ethnicity_American_Hispanic	0.005747126436781609	0.0	0.0196078431372549	-0.005747126436781609	0.0196078431372549
masks	No I am exempt	ethnicity	ethnicity_East_Asian	0.0	0.004807692307692308	0.0	0.004807692307692308	-0.004807692307692308
masks	No I am exempt	ethnicity	ethnicity_Indian_South_Asian_or_South_East_Asian	0.004878048780487805	0.004761904761904762	0.0	-0.00011614401858304254	-0.004761904761904762
masks	No I am exempt	ethnicity	ethnicity_Mixed_ethnicity	0.0024154589371980675	0.0043859649122807015	0.0	0.001970505975082634	-0.0043859649122807015
masks	No I am exempt	ethnicity	ethnicity_Other	0.006622516556291391	0.014492753623188406	0.0	0.007870237066897014	-0.014492753623188406
masks	No I am exempt	ethnicity	ethnicity_Unknown	0.016	0.013888888888888888	0.0	-0.002111111111111112	-0.013888888888888888
masks	No I am exempt	ethnicity	ethnicity_White_European_or_North_American	0.006591490984365637	0.006958165106090542	0.007773205304069501	0.0003666741217249053	0.0008150401979789591
masks	No I am exempt	residence	residence_Abroad	0.010630220197418374	0.027083333333333334	0.01015228426395939	0.016453113135914958	-0.016931049069373944
masks	No I am exempt	residence	residence_United_Kingdom	0.0060927152317880795	0.006020618556701031	0.00738585496866607	-7.209667508704855e-05	0.001365236411965039
masks	No I am exempt	occupation	occupation_Disabled_Not_applicable_Sheltered_employment	0.06756756756756757	0.0916030534351145	0.06976744186046512	0.024035485867546932	-0.02183561157464939
masks	No I am exempt	occupation	occupation_Homemaker	0.014314928425357873	0.00911854103343465	0.015748031496062992	-0.005196387391923223	0.006629490462628342
masks	No I am exempt	occupation	occupation_Retired	0.00550598063413708	0.007124536905101168	0.007403189066059226	0.0016185562709640881	0.00027865216095805754
masks	No I am exempt	occupation	occupation_Student	0.008976660682226212	0.006791171477079796	0.007518796992481203	-0.002185489205146416	0.0007276255154014064
masks	No I am exempt	occupation	occupation_Unemployed_Looking_for_work	0.007530120481927711	0.0058823529411764705	0.009433962264150943	-0.0016477675407512403	0.0035516093229744725
masks	No I am exempt	occupation	occupation_Unknown	0.021505376344086023	0.07142857142857142	0.0	0.0499231950844854	-0.07142857142857142
masks	No I am exempt	occupation	occupation_Worker	0.004942072429717248	0.004948561010548249	0.006026516673362796	6.48858083100029e-06	0.0010779556628145474
masks	No I am exempt	has_condition	has_condition_I_have_a_neurological_condition	0.026402640264026403	0.032036613272311214	0.02824858757062147	0.005633973008284811	-0.003788025701689745
masks	No I am exempt	has_condition	has_condition_I_have_a_psychiatric_condition	0.014460511679644048	0.014272970561998216	0.025210084033613446	-0.00018754111764583171	0.01093711347161523
masks	No I am exempt	has_condition	has_condition_I_have_both_a_psychiatric_and_a_neurological_condition	0.07633587786259542	0.05434782608695652	0.06060606060606061	-0.021988051775638902	0.0062582345191040875
masks	No I am exempt	has_condition	has_condition_No	0.004360876706122218	0.004655408489274304	0.004636408003904344	0.00029453178315208637	-1.900048536996029e-05
masks	No I am exempt	drug_use_frequency	drug_use_frequency_Daily	0.026905829596412557	0.041666666666666664	0.05555555555555555	0.014760837070254107	0.013888888888888888
masks	No I am exempt	drug_use_frequency	drug_use_frequency_Less_than_yearly	0.005862237420615535	0.00404040404040404	0.004866180048661801	-0.0018218333802114944	0.0008257760082577602
masks	No I am exempt	drug_use_frequency	drug_use_frequency_Monthly	0.008021390374331552	0.008620689655172414	0.017543859649122806	0.000599299280840862	0.008923169993950392
masks	No I am exempt	drug_use_frequency	drug_use_frequency_Never_used	0.005901086549269389	0.007073565076798707	0.007492507492507493	0.0011724785275293173	0.00041894241570878624
masks	No I am exempt	drug_use_frequency	drug_use_frequency_Unknown_use	0.007211538461538462	0.006733224982586487	0.00749063670411985	-0.0004783134789519746	0.0007574117215333629
masks	No I am exempt	drug_use_frequency	drug_use_frequency_Weekly	0.004291845493562232	0.015384615384615385	0.02631578947368421	0.011092769891053154	0.010931174089068824
masks	No I am exempt	drug_use_frequency	drug_use_frequency_Yearly	0.00245398773006135	0.007633587786259542	0.0	0.005179600056198191	-0.007633587786259542
masks	No I am exempt	wellbeing_bucket	wellbeing_bucket_high_wellbeing	0.004030565118817701	0.004007123775601068	0.0060207991242474	-2.344134321663298e-05	0.002013675348646332
masks	No I am exempt	wellbeing_bucket	wellbeing_bucket_low_wellbeing	0.015770609318996417	0.012422360248447204	0.023255813953488372	-0.0033482490705492134	0.010833453705041168
masks	No I am exempt	wellbeing_bucket	wellbeing_bucket_medium_wellbeing	0.00856562137049942	0.007503001200480192	0.005813953488372093	-0.001062620170019228	-0.001689047712108099
masks	No I am exempt	online_bucket	online_bucket_between_10h_and_14h	0.006198347107438017	0.007776049766718507	0.005050505050505051	0.0015777026592804907	-0.0027255447162134565
masks	No I am exempt	online_bucket	online_bucket_between_2h_and_4h	0.007163542142966012	0.007394186639469658	0.008259212198221092	0.0002306444965036467	0.0008650255587514342
masks	No I am exempt	online_bucket	online_bucket_between_4h_and_6h	0.007360406091370559	0.008395522388059701	0.009150326797385621	0.0010351162966891429	0.0007548044093259199
masks	No I am exempt	online_bucket	online_bucket_between_6h_and_8h	0.0046063651591289785	0.005559416261292564	0.006578947368421052	0.0009530511021635856	0.001019531107128488
masks	No I am exempt	online_bucket	online_bucket_between_8h_and_10h	0.0044472681067344345	0.004191114836546521	0.0	-0.0002561532701879131	-0.004191114836546521
masks	No I am exempt	online_bucket	online_bucket_less_than_2h	0.005491990846681922	0.0065040650406504065	0.007120253164556962	0.0010120741939684845	0.0006161881239065553
masks	No I am exempt	online_bucket	online_bucket_more_than_14h	0.01278772378516624	0.005291005291005291	0.03225806451612903	-0.0074967184941609494	0.02696705922512374
masks	No I dont think it makes a difference	age_bucket	age_bucket_18_to_30	0.005011693952555964	0.0052113491603937466	0.013850415512465374	0.00019965520783778255	0.008639066352071626
masks	No I dont think it makes a difference	age_bucket	age_bucket_31_to_40	0.0026666666666666666	0.004904632152588556	0.025440313111545987	0.0022379654859218897	0.02053568095895743
masks	No I dont think it makes a difference	age_bucket	age_bucket_41_to_50	0.0023074704355350445	0.005439709882139619	0.01037037037037037	0.0031322394466045747	0.004930660488230751
masks	No I dont think it makes a difference	age_bucket	age_bucket_51_to_60	0.004352331606217617	0.006180871828236825	0.010441767068273093	0.0018285402220192077	0.004260895240036268
masks	No I dont think it makes a difference	age_bucket	age_bucket_61_to_70	0.0037322136692325637	0.005695977216091136	0.007204610951008645	0.001963763546858572	0.0015086337349175093
masks	No I dont think it makes a difference	age_bucket	age_bucket_above_70	0.004320987654320987	0.0020964360587002098	0.004123711340206186	-0.0022245515956207775	0.002027275281505976
masks	No I dont think it makes a difference	sex	sex_Female	0.0023305496212856864	0.00364797081623347	0.008289374529012811	0.0013174211949477837	0.004641403712779341
masks	No I dont think it makes a difference	sex	sex_Male	0.005206738131699847	0.007039892725444184	0.014035087719298246	0.0018331545937443367	0.006995194993854062
masks	No I dont think it makes a difference	sex	sex_Other	0.0	0.016666666666666666	0.0	0.016666666666666666	-0.016666666666666666
masks	No I dont think it makes a difference	edu	edu_PhD	0.003937007874015748	0.004901960784313725	0.008928571428571428	0.0009649529102979774	0.004026610644257703
masks	No I dont think it makes a difference	edu	edu_Primary_Elementary_school_or_less	0.006514657980456026	0.017241379310344827	0.0	0.010726721329888802	-0.017241379310344827
masks	No I dont think it makes a difference	edu	edu_Secondary_school_High_school_diploma	0.004417100489036125	0.0062266500622665	0.014066496163682864	0.0018095495732303752	0.007839846101416362
masks	No I dont think it makes a difference	edu	edu_University_degree	0.003272146847565842	0.0046130189646335215	0.009232954545454546	0.0013408721170676797	0.0046199355808210244
masks	No I dont think it makes a difference	ethnicity	ethnicity_American_Hispanic	0.0	0.011299435028248588	0.0	0.011299435028248588	-0.011299435028248588
masks	No I dont think it makes a difference	ethnicity	ethnicity_East_Asian	0.002583979328165375	0.004807692307692308	0.03125	0.002223712979526933	0.026442307692307692
masks	No I dont think it makes a difference	ethnicity	ethnicity_Indian_South_Asian_or_South_East_Asian	0.004878048780487805	0.004761904761904762	0.015384615384615385	-0.00011614401858304254	0.010622710622710623
masks	No I dont think it makes a difference	ethnicity	ethnicity_Mixed_ethnicity	0.00966183574879227	0.0043859649122807015	0.0	-0.0052758708365115686	-0.0043859649122807015
masks	No I dont think it makes a difference	ethnicity	ethnicity_Other	0.0	0.0	0.0	0.0	0.0
masks	No I dont think it makes a difference	ethnicity	ethnicity_Unknown	0.0	0.013888888888888888	0.0	0.013888888888888888	-0.013888888888888888
masks	No I dont think it makes a difference	ethnicity	ethnicity_White_European_or_North_American	0.0037043089829492835	0.005240099647796581	0.010745313214449017	0.0015357906648472974	0.005505213566652436
masks	No I dont think it makes a difference	residence	residence_Abroad	0.015186028853454821	0.016666666666666666	0.005076142131979695	0.001480637813211845	-0.011590524534686971
masks	No I dont think it makes a difference	residence	residence_United_Kingdom	0.002913907284768212	0.004865979381443299	0.010966875559534467	0.0019520720966750872	0.006100896178091167
masks	No I dont think it makes a difference	occupation	occupation_Disabled_Not_applicable_Sheltered_employment	0.009009009009009009	0.0	0.0	-0.009009009009009009	0.0
masks	No I dont think it makes a difference	occupation	occupation_Homemaker	0.006134969325153374	0.00911854103343465	0.023622047244094488	0.0029835717082812756	0.014503506210659838
masks	No I dont think it makes a difference	occupation	occupation_Retired	0.0032276438200113918	0.003989740666856654	0.0056947608200455585	0.0007620968468452626	0.001705020153188904
masks	No I dont think it makes a difference	occupation	occupation_Student	0.004488330341113106	0.001697792869269949	0.007518796992481203	-0.002790537471843157	0.005821004123211253
masks	No I dont think it makes a difference	occupation	occupation_Unemployed_Looking_for_work	0.012048192771084338	0.011764705882352941	0.018867924528301886	-0.00028348688873139696	0.007103218645948945
masks	No I dont think it makes a difference	occupation	occupation_Unknown	0.0	0.0	0.0	0.0	0.0
masks	No I dont think it makes a difference	occupation	occupation_Worker	0.0032407032326014747	0.005860138038807136	0.013660104459622338	0.0026194348062056616	0.0077999664208152015
masks	No I dont think it makes a difference	has_condition	has_condition_I_have_a_neurological_condition	0.00825082508250825	0.006864988558352402	0.01694915254237288	-0.0013858365241558477	0.01008416398402048
masks	No I dont think it makes a difference	has_condition	has_condition_I_have_a_psychiatric_condition	0.0033370411568409346	0.0053523639607493305	0.0196078431372549	0.002015322803908396	0.014255479176505572
masks	No I dont think it makes a difference	has_condition	has_condition_I_have_both_a_psychiatric_and_a_neurological_condition	0.0	0.0	0.0	0.0	0.0
masks	No I dont think it makes a difference	has_condition	has_condition_No	0.003624624794698986	0.005294386125057051	0.009760858955588092	0.0016697613303580652	0.004466472830531041
masks	No I dont think it makes a difference	drug_use_frequency	drug_use_frequency_Daily	0.02242152466367713	0.016666666666666666	0.05555555555555555	-0.005754857997010462	0.03888888888888889
masks	No I dont think it makes a difference	drug_use_frequency	drug_use_frequency_Less_than_yearly	0.004885197850512946	0.0036363636363636364	0.015815085158150853	-0.0012488342141493093	0.012178721521787218
masks	No I dont think it makes a difference	drug_use_frequency	drug_use_frequency_Monthly	0.00267379679144385	0.01293103448275862	0.017543859649122806	0.01025723769131477	0.0046128251663641855
masks	No I dont think it makes a difference	drug_use_frequency	drug_use_frequency_Never_used	0.003278381416260772	0.004850444624090542	0.006993006993006993	0.0015720632078297702	0.002142562368916451
masks	No I dont think it makes a difference	drug_use_frequency	drug_use_frequency_Unknown_use	0.0030906593406593405	0.005340143951706525	0.011860174781523096	0.002249484611047184	0.006520030829816571
masks	No I dont think it makes a difference	drug_use_frequency	drug_use_frequency_Weekly	0.0	0.03076923076923077	0.02631578947368421	0.03076923076923077	-0.004453441295546562
masks	No I dont think it makes a difference	drug_use_frequency	drug_use_frequency_Yearly	0.007361963190184049	0.005089058524173028	0.0	-0.0022729046660110207	-0.005089058524173028
masks	No I dont think it makes a difference	wellbeing_bucket	wellbeing_bucket_high_wellbeing	0.003694684692249559	0.004674977738201247	0.010946907498631636	0.000980293045951688	0.0062719297604303895
masks	No I dont think it makes a difference	wellbeing_bucket	wellbeing_bucket_low_wellbeing	0.005017921146953405	0.00759144237405107	0.023255813953488372	0.002573521227097665	0.0156643715794373
masks	No I dont think it makes a difference	wellbeing_bucket	wellbeing_bucket_medium_wellbeing	0.003484320557491289	0.005252100840336135	0.008305647840531562	0.0017677802828448457	0.003053547000195427
masks	No I dont think it makes a difference	online_bucket	online_bucket_between_10h_and_14h	0.004132231404958678	0.007776049766718507	0.03535353535353535	0.0036438183617598296	0.027577485586816844
masks	No I dont think it makes a difference	online_bucket	online_bucket_between_2h_and_4h	0.003353147386069197	0.004334523202447731	0.010165184243964422	0.0009813758163785343	0.005830661041516691
masks	No I dont think it makes a difference	online_bucket	online_bucket_between_4h_and_6h	0.004314720812182741	0.005130597014925373	0.01045751633986928	0.0008158762027426318	0.005326919324943907
masks	No I dont think it makes a difference	online_bucket	online_bucket_between_6h_and_8h	0.0016750418760469012	0.004864489228630994	0.010964912280701754	0.0031894473525840928	0.00610042305207076
masks	No I dont think it makes a difference	online_bucket	online_bucket_between_8h_and_10h	0.0038119440914866584	0.003352891869237217	0.002890173410404624	-0.00045905222224944123	-0.000462718458832593
masks	No I dont think it makes a difference	online_bucket	online_bucket_less_than_2h	0.0036613272311212816	0.006829268292682927	0.010284810126582278	0.003167941061561645	0.003455541833899351
masks	No I dont think it makes a difference	online_bucket	online_bucket_more_than_14h	0.015345268542199489	0.010582010582010581	0.0	-0.0047632579601889075	-0.010582010582010581
restrictions	Yes but more needs to be done	age_bucket	age_bucket_18_to_30	0.4122953558302706	0.2154024319629415	0.23822714681440443	-0.1968929238673291	0.022824714851462924
restrictions	Yes but more needs to be done	age_bucket	age_bucket_31_to_40	0.3273333333333333	0.14659400544959128	0.20156555772994128	-0.18073932788374203	0.05497155228035
restrictions	Yes but more needs to be done	age_bucket	age_bucket_41_to_50	0.27747331987308915	0.12103354487760652	0.15259259259259259	-0.15643977499548262	0.03155904771498606
restrictions	Yes but more needs to be done	age_bucket	age_bucket_51_to_60	0.26238341968911916	0.12134027325959662	0.1429718875502008	-0.14104314642952254	0.021631614290604173
restrictions	Yes but more needs to be done	age_bucket	age_bucket_61_to_70	0.24935852577560066	0.11285154859380563	0.12536023054755044	-0.13650697718179505	0.012508681953744813
restrictions	Yes but more needs to be done	age_bucket	age_bucket_above_70	0.24876543209876542	0.11006289308176101	0.1360824742268041	-0.1387025390170044	0.026019581145043102
restrictions	Yes but more needs to be done	sex	sex_Female	0.3062730627306273	0.14059887520899833	0.15975885455915598	-0.165674187521629	0.019159979350157647
restrictions	Yes but more needs to be done	sex	sex_Male	0.27738642164369576	0.12822661749916192	0.14235588972431076	-0.14915980414453384	0.014129272225148842
restrictions	Yes but more needs to be done	sex	sex_Other	0.45454545454545453	0.21666666666666667	0.125	-0.23787878787878786	-0.09166666666666667
restrictions	Yes but more needs to be done	edu	edu_PhD	0.2903543307086614	0.16013071895424835	0.17410714285714285	-0.13022361175441305	0.013976423902894497
restrictions	Yes but more needs to be done	edu	edu_Primary_Elementary_school_or_less	0.2768729641693811	0.13793103448275862	0.11475409836065574	-0.1389419296866225	-0.02317693612210288
restrictions	Yes but more needs to be done	edu	edu_Secondary_school_High_school_diploma	0.292317400220855	0.13424657534246576	0.13938618925831203	-0.15807082487838925	0.005139613915846275
restrictions	Yes but more needs to be done	edu	edu_University_degree	0.29393455706304866	0.13352127114300358	0.15838068181818182	-0.16041328592004508	0.024859410675178245
restrictions	Yes but more needs to be done	ethnicity	ethnicity_American_Hispanic	0.29022988505747127	0.1016949152542373	0.11764705882352941	-0.18853496980323398	0.015952143569292115
restrictions	Yes but more needs to be done	ethnicity	ethnicity_East_Asian	0.35400516795865633	0.12980769230769232	0.140625	-0.224197475650964	0.010817307692307682
restrictions	Yes but more needs to be done	ethnicity	ethnicity_Indian_South_Asian_or_South_East_Asian	0.3878048780487805	0.21904761904761905	0.2	-0.16875725900116145	-0.019047619047619035
restrictions	Yes but more needs to be done	ethnicity	ethnicity_Mixed_ethnicity	0.37922705314009664	0.19298245614035087	0.23529411764705882	-0.18624459699974577	0.042311661506707954
restrictions	Yes but more needs to be done	ethnicity	ethnicity_Other	0.3576158940397351	0.08695652173913043	0.14285714285714285	-0.27065937230060466	0.05590062111801242
restrictions	Yes but more needs to be done	ethnicity	ethnicity_Unknown	0.256	0.16666666666666666	0.18181818181818182	-0.08933333333333335	0.015151515151515166
restrictions	Yes but more needs to be done	ethnicity	ethnicity_White_European_or_North_American	0.28741079697118266	0.13315007301778198	0.15066300868770005	-0.15426072395340068	0.017512935669918073
restrictions	Yes but more needs to be done	residence	residence_Abroad	0.22930903568716782	0.11875	0.1319796954314721	-0.11055903568716782	0.013229695431472094
restrictions	Yes but more needs to be done	residence	residence_United_Kingdom	0.29743046357615893	0.13575257731958762	0.153088630259624	-0.1616778862565713	0.017336052940036373
restrictions	Yes but more needs to be done	occupation	occupation_Disabled_Not_applicable_Sheltered_employment	0.4144144144144144	0.26717557251908397	0.37209302325581395	-0.14723884189533043	0.10491745073672998
restrictions	Yes but more needs to be done	occupation	occupation_Homemaker	0.2903885480572597	0.13069908814589665	0.1968503937007874	-0.15968945991136307	0.06615130555489077
restrictions	Yes but more needs to be done	occupation	occupation_Retired	0.24511106891968862	0.10943288686235395	0.12072892938496584	-0.13567818205733467	0.01129604252261189
restrictions	Yes but more needs to be done	occupation	occupation_Student	0.4254937163375224	0.22580645161290322	0.2781954887218045	-0.1996872647246192	0.052389037108901276
restrictions	Yes but more needs to be done	occupation	occupation_Unemployed_Looking_for_work	0.3433734939759036	0.15	0.14150943396226415	-0.19337349397590362	-0.008490566037735847
restrictions	Yes but more needs to be done	occupation	occupation_Unknown	0.24731182795698925	0.32142857142857145	0.36363636363636365	0.0741167434715822	0.042207792207792194
restrictions	Yes but more needs to be done	occupation	occupation_Worker	0.29701045126792514	0.13647610365933063	0.16110887906789875	-0.1605343476085945	0.02463277540856812
restrictions	Yes but more needs to be done	has_condition	has_condition_I_have_a_neurological_condition	0.3613861386138614	0.18764302059496568	0.192090395480226	-0.1737431180188957	0.0044473748852603134
restrictions	Yes but more needs to be done	has_condition	has_condition_I_have_a_psychiatric_condition	0.38654060066740825	0.20606601248884923	0.2689075630252101	-0.18047458817855902	0.06284155053636084
restrictions	Yes but more needs to be done	has_condition	has_condition_I_have_both_a_psychiatric_and_a_neurological_condition	0.5419847328244275	0.2717391304347826	0.2727272727272727	-0.2702456023896449	0.0009881422924901129
restrictions	Yes but more needs to be done	has_condition	has_condition_No	0.2792660134790735	0.12460063897763578	0.13933626159102	-0.1546653745014377	0.014735622613384222
restrictions	Yes but more needs to be done	drug_use_frequency	drug_use_frequency_Daily	0.3452914798206278	0.15833333333333333	0.16666666666666666	-0.18695814648729447	0.008333333333333331
restrictions	Yes but more needs to be done	drug_use_frequency	drug_use_frequency_Less_than_yearly	0.3302393746946751	0.14383838383838385	0.1654501216545012	-0.18640099085629128	0.02161173781611736
restrictions	Yes but more needs to be done	drug_use_frequency	drug_use_frequency_Monthly	0.31016042780748665	0.17672413793103448	0.22807017543859648	-0.13343628987645217	0.051346037507562
restrictions	Yes but more needs to be done	drug_use_frequency	drug_use_frequency_Never_used	0.28831022855001875	0.12873888439773645	0.14135864135864135	-0.1595713441522823	0.012619756960904893
restrictions	Yes but more needs to be done	drug_use_frequency	drug_use_frequency_Unknown_use	0.2776442307692308	0.13303923844903645	0.15480649188514356	-0.14460499232019433	0.02176725343610711
restrictions	Yes but more needs to be done	drug_use_frequency	drug_use_frequency_Weekly	0.3133047210300429	0.15384615384615385	0.18421052631578946	-0.15945856718388907	0.03036437246963561
restrictions	Yes but more needs to be done	drug_use_frequency	drug_use_frequency_Yearly	0.3423312883435583	0.1450381679389313	0.1574074074074074	-0.19729312040462701	0.012369239468476123
restrictions	Yes but more needs to be done	wellbeing_bucket	wellbeing_bucket_high_wellbeing	0.2542614829120833	0.09795191451469279	0.12424740010946908	-0.1563095683973905	0.02629548559477629
restrictions	Yes but more needs to be done	wellbeing_bucket	wellbeing_bucket_low_wellbeing	0.421505376344086	0.2056590752242926	0.21395348837209302	-0.21584630111979342	0.008294413147800411
restrictions	Yes but more needs to be done	wellbeing_bucket	wellbeing_bucket_medium_wellbeing	0.3339140534262485	0.14480792316926772	0.16237541528239202	-0.1891061302569808	0.017567492113124306
restrictions	Yes but more needs to be done	online_bucket	online_bucket_between_10h_and_14h	0.3987603305785124	0.208398133748056	0.23232323232323232	-0.1903621968304564	0.02392509857517633
restrictions	Yes but more needs to be done	online_bucket	online_bucket_between_2h_and_4h	0.270385611949398	0.1236613972463029	0.14040660736975857	-0.14672421470309507	0.016745210123455673
restrictions	Yes but more needs to be done	online_bucket	online_bucket_between_4h_and_6h	0.3050761421319797	0.14412313432835822	0.17254901960784313	-0.16095300780362148	0.02842588527948492
restrictions	Yes but more needs to be done	online_bucket	online_bucket_between_6h_and_8h	0.3249581239530988	0.14940931202223767	0.15350877192982457	-0.17554881193086114	0.004099459907586894
restrictions	Yes but more needs to be done	online_bucket	online_bucket_between_8h_and_10h	0.3640406607369759	0.16512992455993294	0.1994219653179191	-0.19891073617704294	0.03429204075798614
restrictions	Yes but more needs to be done	online_bucket	online_bucket_less_than_2h	0.2471395881006865	0.10471544715447155	0.12658227848101267	-0.14242414094621497	0.021866831326541117
restrictions	Yes but more needs to be done	online_bucket	online_bucket_more_than_14h	0.319693094629156	0.21693121693121692	0.1935483870967742	-0.1027618776979391	-0.02338282983444273
restrictions	No	age_bucket	age_bucket_18_to_30	0.13498162378884063	0.14765489287782282	0.17174515235457063	0.012673269088982198	0.02409025947674781
restrictions	No	age_bucket	age_bucket_31_to_40	0.12166666666666667	0.13787465940054497	0.15459882583170254	0.016207992733878296	0.016724166431157567
restrictions	No	age_bucket	age_bucket_41_to_50	0.09922122872800693	0.14007252946509519	0.1437037037037037	0.04085130073708826	0.003631174238608509
restrictions	No	age_bucket	age_bucket_51_to_60	0.09409326424870466	0.12459336369551073	0.12048192771084337	0.030500099446806067	-0.004111435984667358
restrictions	No	age_bucket	age_bucket_61_to_70	0.06857942617214835	0.10430758276966892	0.10806916426512968	0.03572815659752057	0.0037615814954607557
restrictions	No	age_bucket	age_bucket_above_70	0.05617283950617284	0.10062893081761007	0.09484536082474226	0.044456091311437226	-0.005783569992867804
restrictions	No	sex	sex_Female	0.08525927364536803	0.11855905152758778	0.11906556141672947	0.033299777882219744	0.000506509889141693
restrictions	No	sex	sex_Male	0.10872894333843798	0.13476366074421722	0.13333333333333333	0.026034717405779242	-0.0014303274108838915
restrictions	No	sex	sex_Other	0.09090909090909091	0.08333333333333333	0.125	-0.007575757575757583	0.04166666666666667
restrictions	No	edu	edu_PhD	0.08070866141732283	0.09313725490196079	0.15625	0.012428593484637956	0.06311274509803921
restrictions	No	edu	edu_Primary_Elementary_school_or_less	0.11074918566775244	0.1839080459770115	0.09836065573770492	0.07315886030925906	-0.08554739023930658
restrictions	No	edu	edu_Secondary_school_High_school_diploma	0.10632591891465532	0.14470734744707348	0.1374680306905371	0.03838142853241816	-0.007239316756536385
restrictions	No	edu	edu_University_degree	0.09273743016759776	0.11776012301383906	0.11647727272727272	0.0250226928462413	-0.0012828502865663421
restrictions	No	ethnicity	ethnicity_American_Hispanic	0.10919540229885058	0.1751412429378531	0.09803921568627451	0.06594584063900252	-0.0771020272515786
restrictions	No	ethnicity	ethnicity_East_Asian	0.11369509043927649	0.1875	0.1875	0.07380490956072351	0.0
restrictions	No	ethnicity	ethnicity_Indian_South_Asian_or_South_East_Asian	0.10975609756097561	0.10952380952380952	0.12307692307692308	-0.00023228803716608681	0.01355311355311356
restrictions	No	ethnicity	ethnicity_Mixed_ethnicity	0.12077294685990338	0.10526315789473684	0.1323529411764706	-0.01550978896516654	0.027089783281733754
restrictions	No	ethnicity	ethnicity_Other	0.09271523178807947	0.11594202898550725	0.14285714285714285	0.023226797197427776	0.0269151138716356
restrictions	No	ethnicity	ethnicity_Unknown	0.104	0.125	0.13636363636363635	0.021000000000000005	0.011363636363636354
restrictions	No	ethnicity	ethnicity_White_European_or_North_American	0.09522253091463746	0.12498926209088566	0.12437128486511202	0.0297667311762482	-0.0006179772257736416
restrictions	No	residence	residence_Abroad	0.08276385725132877	0.14166666666666666	0.17766497461928935	0.05890280941533789	0.03599830795262268
restrictions	No	residence	residence_United_Kingdom	0.09764238410596027	0.12544329896907216	0.1228737690241719	0.027800914863111897	-0.00256952994490027
restrictions	No	occupation	occupation_Disabled_Not_applicable_Sheltered_employment	0.08558558558558559	0.08396946564885496	0.09302325581395349	-0.0016161199367306228	0.009053790165098524
restrictions	No	occupation	occupation_Homemaker	0.08384458077709611	0.1094224924012158	0.15748031496062992	0.025577911624119695	0.04805782255941411
restrictions	No	occupation	occupation_Retired	0.06493259920258211	0.10287831290966087	0.10535307517084283	0.03794571370707876	0.0024747622611819564
restrictions	No	occupation	occupation_Student	0.12477558348294435	0.12224108658743633	0.10526315789473684	-0.002534496895508012	-0.016977928692699498
restrictions	No	occupation	occupation_Unemployed_Looking_for_work	0.12650602409638553	0.17941176470588235	0.16037735849056603	0.05290574060949682	-0.019034406215316324
restrictions	No	occupation	occupation_Unknown	0.12903225806451613	0.14285714285714285	0.09090909090909091	0.013824884792626724	-0.05194805194805194
restrictions	No	occupation	occupation_Worker	0.10653811877177348	0.13595520250032556	0.13780634793089594	0.029417083728552076	0.0018511454305703834
restrictions	No	has_condition	has_condition_I_have_a_neurological_condition	0.07095709570957096	0.10068649885583524	0.11299435028248588	0.02972940314626428	0.01230785142665064
restrictions	No	has_condition	has_condition_I_have_a_psychiatric_condition	0.09121245828698554	0.11685994647636039	0.14565826330532214	0.025647488189374845	0.02879831682896175
restrictions	No	has_condition	has_condition_I_have_both_a_psychiatric_and_a_neurological_condition	0.061068702290076333	0.11956521739130435	0.12121212121212122	0.05849651510122802	0.001646903820816864
restrictions	No	has_condition	has_condition_No	0.09837458231862717	0.12806937471474214	0.12396290873596877	0.029694792396114972	-0.0041064659787733715
restrictions	No	drug_use_frequency	drug_use_frequency_Daily	0.16143497757847533	0.225	0.2222222222222222	0.06356502242152468	-0.0027777777777777957
restrictions	No	drug_use_frequency	drug_use_frequency_Less_than_yearly	0.10258915486077186	0.1195959595959596	0.13381995133819952	0.017006804735187744	0.014223991742239914
restrictions	No	drug_use_frequency	drug_use_frequency_Monthly	0.12299465240641712	0.15086206896551724	0.15789473684210525	0.02786741655910012	0.007032667876588017
restrictions	No	drug_use_frequency	drug_use_frequency_Never_used	0.08533158486324466	0.1198464025869038	0.12387612387612387	0.034514817723659136	0.0040297212892200784
restrictions	No	drug_use_frequency	drug_use_frequency_Unknown_use	0.10370879120879122	0.1318783375899698	0.11610486891385768	0.028169546381178592	-0.015773468676112123
restrictions	No	drug_use_frequency	drug_use_frequency_Weekly	0.1759656652360515	0.2	0.10526315789473684	0.024034334763948506	-0.09473684210526317
restrictions	No	drug_use_frequency	drug_use_frequency_Yearly	0.1276073619631902	0.11195928753180662	0.17592592592592593	-0.01564807443138358	0.06396663839411931
restrictions	No	wellbeing_bucket	wellbeing_bucket_high_wellbeing	0.09303887815937527	0.12600178094390027	0.11932129173508484	0.032962902784525	-0.006680489208815435
restrictions	No	wellbeing_bucket	wellbeing_bucket_low_wellbeing	0.10681003584229391	0.13526570048309178	0.16046511627906976	0.028455664640797865	0.02519941579597798
restrictions	No	wellbeing_bucket	wellbeing_bucket_medium_wellbeing	0.10090011614401859	0.12409963985594237	0.12333887043189369	0.023199523711923783	-0.0007607694240486795
restrictions	No	online_bucket	online_bucket_between_10h_and_14h	0.10537190082644628	0.13374805598755832	0.1414141414141414	0.02837615516111204	0.007666085426583091
restrictions	No	online_bucket	online_bucket_between_2h_and_4h	0.09541228471269624	0.12493625701172871	0.12833545108005082	0.029523972299032475	0.003399194068322106
restrictions	No	online_bucket	online_bucket_between_4h_and_6h	0.09543147208121827	0.12173507462686567	0.11895424836601307	0.026303602545647398	-0.0027808262608526035
restrictions	No	online_bucket	online_bucket_between_6h_and_8h	0.10845896147403684	0.13273106323835998	0.13596491228070176	0.024272101764323137	0.00323384904234178
restrictions	No	online_bucket	online_bucket_between_8h_and_10h	0.09021601016518424	0.13076278290025148	0.11560693641618497	0.04054677273506724	-0.01515584648406651
restrictions	No	online_bucket	online_bucket_less_than_2h	0.08878718535469107	0.12552845528455284	0.12262658227848101	0.036741269929861764	-0.002901873006071823
restrictions	No	online_bucket	online_bucket_more_than_14h	0.15089514066496162	0.10052910052910052	0.0967741935483871	-0.0503660401358611	-0.0037549069807134294
gov		age_bucket	age_bucket_18_to_30	0.0	0.0	0.0	0.0	0.0
gov		age_bucket	age_bucket_31_to_40	0.0	0.0	0.0	0.0	0.0
gov		age_bucket	age_bucket_41_to_50	0.0	0.0	0.0	0.0	0.0
gov		age_bucket	age_bucket_51_to_60	0.0	0.0	0.0	0.0	0.0
gov		age_bucket	age_bucket_61_to_70	0.0	0.0	0.0	0.0	0.0
gov		age_bucket	age_bucket_above_70	0.0	0.0	0.0	0.0	0.0
gov		sex	sex_Female	0.0	0.0	0.0	0.0	0.0
gov		sex	sex_Male	0.0	0.0	0.0	0.0	0.0
gov		sex	sex_Other	0.0	0.0	0.0	0.0	0.0
gov		edu	edu_PhD	0.0	0.0	0.0	0.0	0.0
gov		edu	edu_Primary_Elementary_school_or_less	0.0	0.0	0.0	0.0	0.0
gov		edu	edu_Secondary_school_High_school_diploma	0.0	0.0	0.0	0.0	0.0
gov		edu	edu_University_degree	0.0	0.0	0.0	0.0	0.0
gov		ethnicity	ethnicity_American_Hispanic	0.0	0.0	0.0	0.0	0.0
gov		ethnicity	ethnicity_East_Asian	0.0	0.0	0.0	0.0	0.0
gov		ethnicity	ethnicity_Indian_South_Asian_or_South_East_Asian	0.0	0.0	0.0	0.0	0.0
gov		ethnicity	ethnicity_Mixed_ethnicity	0.0	0.0	0.0	0.0	0.0
gov		ethnicity	ethnicity_Other	0.0	0.0	0.0	0.0	0.0
gov		ethnicity	ethnicity_Unknown	0.0	0.0	0.0	0.0	0.0
gov		ethnicity	ethnicity_White_European_or_North_American	0.0	0.0	0.0	0.0	0.0
gov		residence	residence_Abroad	0.0	0.0	0.0	0.0	0.0
gov		residence	residence_United_Kingdom	0.0	0.0	0.0	0.0	0.0
gov		occupation	occupation_Disabled_Not_applicable_Sheltered_employment	0.0	0.0	0.0	0.0	0.0
gov		occupation	occupation_Homemaker	0.0	0.0	0.0	0.0	0.0
gov		occupation	occupation_Retired	0.0	0.0	0.0	0.0	0.0
gov		occupation	occupation_Student	0.0	0.0	0.0	0.0	0.0
gov		occupation	occupation_Unemployed_Looking_for_work	0.0	0.0	0.0	0.0	0.0
gov		occupation	occupation_Unknown	0.0	0.0	0.0	0.0	0.0
gov		occupation	occupation_Worker	0.0	0.0	0.0	0.0	0.0
gov		has_condition	has_condition_I_have_a_neurological_condition	0.0	0.0	0.0	0.0	0.0
gov		has_condition	has_condition_I_have_a_psychiatric_condition	0.0	0.0	0.0	0.0	0.0
gov		has_condition	has_condition_I_have_both_a_psychiatric_and_a_neurological_condition	0.0	0.0	0.0	0.0	0.0
gov		has_condition	has_condition_No	0.0	0.0	0.0	0.0	0.0
gov		drug_use_frequency	drug_use_frequency_Daily	0.0	0.0	0.0	0.0	0.0
gov		drug_use_frequency	drug_use_frequency_Less_than_yearly	0.0	0.0	0.0	0.0	0.0
gov		drug_use_frequency	drug_use_frequency_Monthly	0.0	0.0	0.0	0.0	0.0
gov		drug_use_frequency	drug_use_frequency_Never_used	0.0	0.0	0.0	0.0	0.0
gov		drug_use_frequency	drug_use_frequency_Unknown_use	0.0	0.0	0.0	0.0	0.0
gov		drug_use_frequency	drug_use_frequency_Weekly	0.0	0.0	0.0	0.0	0.0
gov		drug_use_frequency	drug_use_frequency_Yearly	0.0	0.0	0.0	0.0	0.0
gov		wellbeing_bucket	wellbeing_bucket_high_wellbeing	0.0	0.0	0.0	0.0	0.0
gov		wellbeing_bucket	wellbeing_bucket_low_wellbeing	0.0	0.0	0.0	0.0	0.0
gov		wellbeing_bucket	wellbeing_bucket_medium_wellbeing	0.0	0.0	0.0	0.0	0.0
gov		online_bucket	online_bucket_between_10h_and_14h	0.0	0.0	0.0	0.0	0.0
gov		online_bucket	online_bucket_between_2h_and_4h	0.0	0.0	0.0	0.0	0.0
gov		online_bucket	online_bucket_between_4h_and_6h	0.0	0.0	0.0	0.0	0.0
gov		online_bucket	online_bucket_between_6h_and_8h	0.0	0.0	0.0	0.0	0.0
gov		online_bucket	online_bucket_between_8h_and_10h	0.0	0.0	0.0	0.0	0.0
gov		online_bucket	online_bucket_less_than_2h	0.0	0.0	0.0	0.0	0.0
gov		online_bucket	online_bucket_more_than_14h	0.0	0.0	0.0	0.0	0.0
guidelines	Yes most of the time	age_bucket	age_bucket_18_to_30	0.5085198797193451	0.47770700636942676	0.48753462603878117	-0.030812873349918335	0.009827619669354415
guidelines	Yes most of the time	age_bucket	age_bucket_31_to_40	0.43733333333333335	0.3912806539509537	0.4070450097847358	-0.04605267938237967	0.015764355833782107
guidelines	Yes most of the time	age_bucket	age_bucket_41_to_50	0.36198442457456015	0.34224841341795104	0.3985185185185185	-0.019736011156609112	0.05627010510056746
guidelines	Yes most of the time	age_bucket	age_bucket_51_to_60	0.3537823834196891	0.3461288223812622	0.41686746987951806	-0.007653561038426904	0.07073864749825587
guidelines	Yes most of the time	age_bucket	age_bucket_61_to_70	0.32470258922323303	0.35065859736561056	0.3861671469740634	0.02595600814237753	0.035508549608452844
guidelines	Yes most of the time	age_bucket	age_bucket_above_70	0.27469135802469136	0.33228511530398325	0.3917525773195876	0.05759375727929189	0.05946746201560438
guidelines	Yes most of the time	sex	sex_Female	0.362303359875704	0.3450372397020824	0.37829691032403917	-0.017266120173621613	0.03325967062195678
guidelines	Yes most of the time	sex	sex_Male	0.3945890760592139	0.39825678846798523	0.4456140350877193	0.0036677124087713397	0.04735724661973406
guidelines	Yes most of the time	sex	sex_Other	0.37373737373737376	0.3	0.3125	-0.07373737373737377	0.012500000000000011
guidelines	Yes most of the time	edu	edu_PhD	0.33661417322834647	0.3235294117647059	0.34375	-0.01308476146364057	0.0202205882352941
guidelines	Yes most of the time	edu	edu_Primary_Elementary_school_or_less	0.30618892508143325	0.3333333333333333	0.26229508196721313	0.027144408251900065	-0.07103825136612019
guidelines	Yes most of the time	edu	edu_Secondary_school_High_school_diploma	0.36598832623442185	0.3424657534246575	0.3932225063938619	-0.02352257280976433	0.0507567529692044
guidelines	Yes most of the time	edu	edu_University_degree	0.3892258579409417	0.38864684777037417	0.4225852272727273	-0.000579010170567551	0.03393837950235312
guidelines	Yes most of the time	ethnicity	ethnicity_American_Hispanic	0.3563218390804598	0.3615819209039548	0.35294117647058826	0.005260081823495022	-0.008640744433366543
guidelines	Yes most of the time	ethnicity	ethnicity_East_Asian	0.4315245478036176	0.4230769230769231	0.46875	-0.008447624726694525	0.04567307692307693
guidelines	Yes most of the time	ethnicity	ethnicity_Indian_South_Asian_or_South_East_Asian	0.3975609756097561	0.40476190476190477	0.4	0.00720092915214865	-0.004761904761904745
guidelines	Yes most of the time	ethnicity	ethnicity_Mixed_ethnicity	0.4420289855072464	0.4605263157894737	0.4411764705882353	0.018497330282227276	-0.01934984520123839
guidelines	Yes most of the time	ethnicity	ethnicity_Other	0.46357615894039733	0.37681159420289856	0.38095238095238093	-0.08676456473749877	0.0041407867494823725
guidelines	Yes most of the time	ethnicity	ethnicity_Unknown	0.272	0.2638888888888889	0.18181818181818182	-0.008111111111111124	-0.08207070707070707
guidelines	Yes most of the time	ethnicity	ethnicity_White_European_or_North_American	0.3754426104483303	0.36740829825616356	0.4074074074074074	-0.00803431219216677	0.03999910915124383
guidelines	Yes most of the time	residence	residence_Abroad	0.340167046317388	0.32916666666666666	0.350253807106599	-0.011000379650721315	0.021087140439932317
guidelines	Yes most of the time	residence	residence_United_Kingdom	0.3806622516556291	0.37162886597938144	0.4093554162936437	-0.009033385676247674	0.03772655031426225
guidelines	Yes most of the time	occupation	occupation_Disabled_Not_applicable_Sheltered_employment	0.24774774774774774	0.22900763358778625	0.23255813953488372	-0.01874011415996149	0.0035505059470974654
guidelines	Yes most of the time	occupation	occupation_Homemaker	0.3149284253578732	0.3373860182370821	0.41732283464566927	0.0224575928792089	0.07993681640858719
guidelines	Yes most of the time	occupation	occupation_Retired	0.30605657869755076	0.347677400968937	0.3895216400911162	0.04162082227138625	0.04184423912217916
guidelines	Yes most of the time	occupation	occupation_Student	0.5044883303411131	0.466893039049236	0.48120300751879697	-0.03759529129187705	0.014309968469560952
guidelines	Yes most of the time	occupation	occupation_Unemployed_Looking_for_work	0.36596385542168675	0.37941176470588234	0.44339622641509435	0.013447909284195592	0.06398446170921201
guidelines	Yes most of the time	occupation	occupation_Unknown	0.3655913978494624	0.39285714285714285	0.36363636363636365	0.027265745007680475	-0.029220779220779203
guidelines	Yes most of the time	occupation	occupation_Worker	0.4029004293931783	0.3760906368016669	0.4162314182402571	-0.02680979259151145	0.040140781438590234
guidelines	Yes most of the time	has_condition	has_condition_I_have_a_neurological_condition	0.3102310231023102	0.2562929061784897	0.3220338983050847	-0.0539381169238205	0.06574099212659501
guidelines	Yes most of the time	has_condition	has_condition_I_have_a_psychiatric_condition	0.37374860956618466	0.36752899197145406	0.3585434173669468	-0.006219617594730609	-0.008985574604507274
guidelines	Yes most of the time	has_condition	has_condition_I_have_both_a_psychiatric_and_a_neurological_condition	0.24427480916030533	0.2391304347826087	0.42424242424242425	-0.005144374377696631	0.18511198945981555
guidelines	Yes most of the time	has_condition	has_condition_No	0.38177493345415414	0.37590141487905065	0.4145924841386042	-0.005873518575103487	0.03869106925955357
guidelines	Yes most of the time	drug_use_frequency	drug_use_frequency_Daily	0.4349775784753363	0.425	0.5	-0.009977578475336313	0.07500000000000001
guidelines	Yes most of the time	drug_use_frequency	drug_use_frequency_Less_than_yearly	0.44455300439667805	0.4068686868686869	0.46472019464720193	-0.037684317527991174	0.057851507778515054
guidelines	Yes most of the time	drug_use_frequency	drug_use_frequency_Monthly	0.5427807486631016	0.5129310344827587	0.5614035087719298	-0.02984971418034288	0.04847247428917112
guidelines	Yes most of the time	drug_use_frequency	drug_use_frequency_Never_used	0.3518171599850131	0.3389248181083266	0.3761238761238761	-0.01289234187668653	0.03719905801554951
guidelines	Yes most of the time	drug_use_frequency	drug_use_frequency_Unknown_use	0.3645260989010989	0.3591827257952171	0.3982521847690387	-0.005343373105881788	0.03906945897382158
guidelines	Yes most of the time	drug_use_frequency	drug_use_frequency_Weekly	0.4721030042918455	0.4230769230769231	0.47368421052631576	-0.04902608121492241	0.05060728744939269
guidelines	Yes most of the time	drug_use_frequency	drug_use_frequency_Yearly	0.5325153374233129	0.5292620865139949	0.5277777777777778	-0.0032532509093180506	-0.001484308736217077
guidelines	Yes most of the time	wellbeing_bucket	wellbeing_bucket_high_wellbeing	0.3728272734906373	0.359973285841496	0.4220032840722496	-0.012853987649141307	0.06202999823075356
guidelines	Yes most of the time	wellbeing_bucket	wellbeing_bucket_low_wellbeing	0.34551971326164876	0.3285024154589372	0.34418604651162793	-0.01701729780271155	0.015683631052690716
guidelines	Yes most of the time	wellbeing_bucket	wellbeing_bucket_medium_wellbeing	0.3935830429732869	0.3858043217286915	0.4065614617940199	-0.007778721244595388	0.020757140065328417
guidelines	Yes most of the time	online_bucket	online_bucket_between_10h_and_14h	0.36673553719008267	0.3810264385692068	0.3282828282828283	0.014290901379124143	-0.05274361028637853
guidelines	Yes most of the time	online_bucket	online_bucket_between_2h_and_4h	0.3685413808870599	0.3556858745537991	0.4059720457433291	-0.012855506333260824	0.05028617118953005
guidelines	Yes most of the time	online_bucket	online_bucket_between_4h_and_6h	0.39568527918781726	0.39365671641791045	0.4130718954248366	-0.0020285627699068165	0.01941517900692613
guidelines	Yes most of the time	online_bucket	online_bucket_between_6h_and_8h	0.4053601340033501	0.3752605976372481	0.40350877192982454	-0.030099536366101964	0.028248174292576422
guidelines	Yes most of the time	online_bucket	online_bucket_between_8h_and_10h	0.38310038119440915	0.38558256496227994	0.43641618497109824	0.0024821837678707936	0.0508336200088183
guidelines	Yes most of the time	online_bucket	online_bucket_less_than_2h	0.36064073226544624	0.3616260162601626	0.40427215189873417	0.0009852839947163683	0.04264613563857156
guidelines	Yes most of the time	online_bucket	online_bucket_more_than_14h	0.3938618925831202	0.35978835978835977	0.5161290322580645	-0.03407353279476044	0.15634067246970473
guidelines	I used to but I've given up	age_bucket	age_bucket_18_to_30	0.04744403608419646	0.0787492762015055	0.0997229916897507	0.03130524011730904	0.020973715488245198
guidelines	I used to but I've given up	age_bucket	age_bucket_31_to_40	0.021333333333333333	0.03596730245231607	0.06653620352250489	0.01463396911898274	0.030568901070188816
guidelines	I used to but I've given up	age_bucket	age_bucket_41_to_50	0.008941447937698297	0.027651858567543066	0.037037037037037035	0.01871041062984477	0.009385178469493969
guidelines	I used to but I've given up	age_bucket	age_bucket_51_to_60	0.0062176165803108805	0.02342225113858165	0.033734939759036145	0.01720463455827077	0.010312688620454494
guidelines	I used to but I've given up	age_bucket	age_bucket_61_to_70	0.0030324236062514577	0.016375934496262016	0.03890489913544669	0.013343510890010558	0.022528964639184672
guidelines	I used to but I've given up	age_bucket	age_bucket_above_70	0.0024691358024691358	0.019916142557651992	0.030927835051546393	0.017447006755182855	0.011011692493894401
guidelines	I used to but I've given up	sex	sex_Female	0.012429597980190329	0.02933576531387749	0.038055764883195176	0.01690616733368716	0.008719999569317686
guidelines	I used to but I've given up	sex	sex_Male	0.015722307299642673	0.034528997653369094	0.05263157894736842	0.01880669035372642	0.018102581293999324
guidelines	I used to but I've given up	sex	sex_Other	0.020202020202020204	0.016666666666666666	0.0	-0.0035353535353535373	-0.016666666666666666
guidelines	I used to but I've given up	edu	edu_PhD	0.00984251968503937	0.02287581699346405	0.049107142857142856	0.013033297308424681	0.026231325863678805
guidelines	I used to but I've given up	edu	edu_Primary_Elementary_school_or_less	0.013029315960912053	0.040229885057471264	0.03278688524590164	0.027200569096559213	-0.007442999811569623
guidelines	I used to but I've given up	edu	edu_Secondary_school_High_school_diploma	0.01419782300047326	0.029140722291407222	0.043478260869565216	0.014942899290933962	0.014337538578157994
guidelines	I used to but I've given up	edu	edu_University_degree	0.014365522745411013	0.03357252690927729	0.044389204545454544	0.019207004163866278	0.010816677636177253
guidelines	I used to but I've given up	ethnicity	ethnicity_American_Hispanic	0.020114942528735632	0.022598870056497175	0.0784313725490196	0.002483927527761543	0.05583250249252243
guidelines	I used to but I've given up	ethnicity	ethnicity_East_Asian	0.015503875968992248	0.052884615384615384	0.046875	0.037380739415623136	-0.006009615384615384
guidelines	I used to but I've given up	ethnicity	ethnicity_Indian_South_Asian_or_South_East_Asian	0.026829268292682926	0.05238095238095238	0.06153846153846154	0.025551684088269456	0.00915750915750916
guidelines	I used to but I've given up	ethnicity	ethnicity_Mixed_ethnicity	0.014492753623188406	0.03508771929824561	0.10294117647058823	0.020594965675057204	0.06785345717234262
guidelines	I used to but I've given up	ethnicity	ethnicity_Other	0.026490066225165563	0.057971014492753624	0.047619047619047616	0.03148094826758806	-0.010351966873706007
guidelines	I used to but I've given up	ethnicity	ethnicity_Unknown	0.008	0.013888888888888888	0.0	0.005888888888888888	-0.013888888888888888
guidelines	I used to but I've given up	ethnicity	ethnicity_White_European_or_North_American	0.013564307893446642	0.031011081522205997	0.04275262917238226	0.017446773628759356	0.011741547650176265
guidelines	I used to but I've given up	residence	residence_Abroad	0.012908124525436599	0.025	0.06091370558375635	0.012091875474563403	0.035913705583756346
guidelines	I used to but I've given up	residence	residence_United_Kingdom	0.01414569536423841	0.032	0.043419874664279316	0.01785430463576159	0.011419874664279316
guidelines	I used to but I've given up	occupation	occupation_Disabled_Not_applicable_Sheltered_employment	0.013513513513513514	0.03816793893129771	0.046511627906976744	0.024654425417784197	0.008343688975679033
guidelines	I used to but I've given up	occupation	occupation_Homemaker	0.0081799591002045	0.0364741641337386	0.007874015748031496	0.028294205033534102	-0.028600148385707104
guidelines	I used to but I've given up	occupation	occupation_Retired	0.0034175052211885323	0.018808777429467086	0.038154897494305236	0.015391272208278553	0.01934612006483815
guidelines	I used to but I've given up	occupation	occupation_Student	0.05206463195691203	0.06960950764006792	0.12781954887218044	0.017544875683155887	0.05821004123211253
guidelines	I used to but I've given up	occupation	occupation_Unemployed_Looking_for_work	0.018072289156626505	0.05	0.05660377358490566	0.031927710843373494	0.006603773584905659
guidelines	I used to but I've given up	occupation	occupation_Unknown	0.0	0.0	0.0	0.0	0.0
guidelines	I used to but I've given up	occupation	occupation_Worker	0.015312322774041967	0.03372835004557885	0.04539975893933307	0.018416027271536885	0.011671408893754218
guidelines	I used to but I've given up	has_condition	has_condition_I_have_a_neurological_condition	0.0049504950495049506	0.02517162471395881	0.03954802259887006	0.020221129664453857	0.014376397884911251
guidelines	I used to but I've given up	has_condition	has_condition_I_have_a_psychiatric_condition	0.023915461624026697	0.042818911685994644	0.05322128851540616	0.018903450061967947	0.010402376829411517
guidelines	I used to but I've given up	has_condition	has_condition_I_have_both_a_psychiatric_and_a_neurological_condition	0.015267175572519083	0.043478260869565216	0.030303030303030304	0.028211085297046135	-0.013175230566534912
guidelines	I used to but I've given up	has_condition	has_condition_No	0.013365803930452511	0.03076220903696942	0.04367984382625671	0.01739640510651691	0.012917634789287293
guidelines	I used to but I've given up	drug_use_frequency	drug_use_frequency_Daily	0.017937219730941704	0.058333333333333334	0.1111111111111111	0.040396113602391634	0.05277777777777777
guidelines	I used to but I've given up	drug_use_frequency	drug_use_frequency_Less_than_yearly	0.019540791402051783	0.03434343434343434	0.0535279805352798	0.01480264294138256	0.01918454619184546
guidelines	I used to but I've given up	drug_use_frequency	drug_use_frequency_Monthly	0.06417112299465241	0.08189655172413793	0.10526315789473684	0.017725428729485515	0.023366606170598908
guidelines	I used to but I've given up	drug_use_frequency	drug_use_frequency_Never_used	0.008992131884600974	0.02122069523039612	0.03796203796203796	0.012228563345795146	0.01674134273164184
guidelines	I used to but I've given up	drug_use_frequency	drug_use_frequency_Unknown_use	0.014938186813186814	0.03343394474111911	0.03932584269662921	0.018495757927932295	0.005891897955510102
guidelines	I used to but I've given up	drug_use_frequency	drug_use_frequency_Weekly	0.06437768240343347	0.12307692307692308	0.10526315789473684	0.05869924067348961	-0.017813765182186247
guidelines	I used to but I've given up	drug_use_frequency	drug_use_frequency_Yearly	0.022085889570552148	0.061068702290076333	0.08333333333333333	0.03898281271952418	0.022264631043256995
guidelines	I used to but I've given up	wellbeing_bucket	wellbeing_bucket_high_wellbeing	0.010076412797044252	0.024265360641139804	0.03557744937055282	0.014188947844095553	0.011312088729413017
guidelines	I used to but I've given up	wellbeing_bucket	wellbeing_bucket_low_wellbeing	0.032974910394265235	0.04071773636991028	0.053488372093023255	0.007742825975645046	0.012770635723112975
guidelines	I used to but I've given up	wellbeing_bucket	wellbeing_bucket_medium_wellbeing	0.01713124274099884	0.03481392557022809	0.049003322259136214	0.01768268282922925	0.014189396688908125
guidelines	I used to but I've given up	online_bucket	online_bucket_between_10h_and_14h	0.02066115702479339	0.03110419906687403	0.08080808080808081	0.01044304204208064	0.04970388174120678
guidelines	I used to but I've given up	online_bucket	online_bucket_between_2h_and_4h	0.010516689529035207	0.030851606323304435	0.04510800508259212	0.02033491679426923	0.014256398759287685
guidelines	I used to but I've given up	online_bucket	online_bucket_between_4h_and_6h	0.016751269035532996	0.039645522388059705	0.050980392156862744	0.02289425335252671	0.01133486976880304
guidelines	I used to but I've given up	online_bucket	online_bucket_between_6h_and_8h	0.022613065326633167	0.035441278665740095	0.05263157894736842	0.012828213339106928	0.017190300281628323
guidelines	I used to but I've given up	online_bucket	online_bucket_between_8h_and_10h	0.019695044472681066	0.039396479463537304	0.028901734104046242	0.019701434990856238	-0.010494745359491062
guidelines	I used to but I've given up	online_bucket	online_bucket_less_than_2h	0.008009153318077803	0.023089430894308944	0.03560126582278481	0.01508027757623114	0.012511834928475869
guidelines	I used to but I've given up	online_bucket	online_bucket_more_than_14h	0.023017902813299233	0.026455026455026454	0.016129032258064516	0.0034371236417272202	-0.010325994196961938
leaving_home	Yes - I am scared for my health	age_bucket	age_bucket_18_to_30	0.03174072836618777	0.02026635784597568	0.0110803324099723	-0.01147437052021209	-0.009186025436003381
leaving_home	Yes - I am scared for my health	age_bucket	age_bucket_31_to_40	0.033	0.015258855585831062	0.021526418786692758	-0.01774114441416894	0.006267563200861696
leaving_home	Yes - I am scared for my health	age_bucket	age_bucket_41_to_50	0.04153446783963081	0.017225747960108794	0.016296296296296295	-0.024308719879522014	-0.0009294516638124993
leaving_home	Yes - I am scared for my health	age_bucket	age_bucket_51_to_60	0.05761658031088083	0.02081977878985036	0.015261044176706828	-0.03679680152103047	-0.005558734613143532
leaving_home	Yes - I am scared for my health	age_bucket	age_bucket_61_to_70	0.08257522743177047	0.019579921680313278	0.01729106628242075	-0.06299530575145719	-0.0022888553978925273
leaving_home	Yes - I am scared for my health	age_bucket	age_bucket_above_70	0.09814814814814815	0.013626834381551363	0.024742268041237112	-0.08452131376659679	0.01111543365968575
leaving_home	Yes - I am scared for my health	sex	sex_Female	0.06535249563021946	0.02188782489740082	0.02110022607385079	-0.043464670732818636	-0.0007875988235500307
leaving_home	Yes - I am scared for my health	sex	sex_Male	0.045533435426237875	0.014582634931277238	0.012531328320802004	-0.030950800494960636	-0.002051306610475234
leaving_home	Yes - I am scared for my health	sex	sex_Other	0.10101010101010101	0.03333333333333333	0.0	-0.06767676767676767	-0.03333333333333333
leaving_home	Yes - I am scared for my health	edu	edu_PhD	0.06496062992125984	0.016339869281045753	0.013392857142857142	-0.04862076064021409	-0.0029470121381886105
leaving_home	Yes - I am scared for my health	edu	edu_Primary_Elementary_school_or_less	0.04234527687296417	0.011494252873563218	0.0	-0.03085102399940095	-0.011494252873563218
leaving_home	Yes - I am scared for my health	edu	edu_Secondary_school_High_school_diploma	0.058999842246411104	0.02042341220423412	0.0159846547314578	-0.03857643004217698	-0.00443875747277632
leaving_home	Yes - I am scared for my health	edu	edu_University_degree	0.053950518754988026	0.017811378780112762	0.018821022727272728	-0.036139139974875265	0.001009643947159966
leaving_home	Yes - I am scared for my health	ethnicity	ethnicity_American_Hispanic	0.04597701149425287	0.005649717514124294	0.0	-0.040327293980128576	-0.005649717514124294
leaving_home	Yes - I am scared for my health	ethnicity	ethnicity_East_Asian	0.03617571059431524	0.014423076923076924	0.0	-0.02175263367123832	-0.014423076923076924
leaving_home	Yes - I am scared for my health	ethnicity	ethnicity_Indian_South_Asian_or_South_East_Asian	0.07073170731707316	0.0380952380952381	0.07692307692307693	-0.032636469221835065	0.03882783882783883
leaving_home	Yes - I am scared for my health	ethnicity	ethnicity_Mixed_ethnicity	0.05314009661835749	0.02631578947368421	0.014705882352941176	-0.02682430714467328	-0.011609907120743033
leaving_home	Yes - I am scared for my health	ethnicity	ethnicity_Other	0.06622516556291391	0.08695652173913043	0.047619047619047616	0.02073135617621652	-0.039337474120082816
leaving_home	Yes - I am scared for my health	ethnicity	ethnicity_Unknown	0.072	0.027777777777777776	0.0	-0.04422222222222222	-0.027777777777777776
leaving_home	Yes - I am scared for my health	ethnicity	ethnicity_White_European_or_North_American	0.056054910933159015	0.017781977493342496	0.016918152720621856	-0.03827293343981652	-0.0008638247727206401
leaving_home	Yes - I am scared for my health	residence	residence_Abroad	0.05618830675778284	0.035416666666666666	0.025380710659898477	-0.02077164009111617	-0.010035956006768189
leaving_home	Yes - I am scared for my health	residence	residence_United_Kingdom	0.055894039735099335	0.017814432989690723	0.017009847806624886	-0.03807960674540861	-0.0008045851830658368
leaving_home	Yes - I am scared for my health	occupation	occupation_Disabled_Not_applicable_Sheltered_employment	0.12162162162162163	0.06870229007633588	0.06976744186046512	-0.05291933154528575	0.001065151784129234
leaving_home	Yes - I am scared for my health	occupation	occupation_Homemaker	0.065439672801636	0.0243161094224924	0.031496062992125984	-0.04112356337914359	0.007179953569633583
leaving_home	Yes - I am scared for my health	occupation	occupation_Retired	0.08448832352382761	0.018523795953263037	0.01879271070615034	-0.06596452757056458	0.00026891475288730315
leaving_home	Yes - I am scared for my health	occupation	occupation_Student	0.04039497307001795	0.02037351443123939	0.03007518796992481	-0.02002145863877856	0.00970167353868542
leaving_home	Yes - I am scared for my health	occupation	occupation_Unemployed_Looking_for_work	0.0572289156626506	0.029411764705882353	0.018867924528301886	-0.027817150956768247	-0.010543840177580466
leaving_home	Yes - I am scared for my health	occupation	occupation_Unknown	0.07526881720430108	0.03571428571428571	0.18181818181818182	-0.039554531490015366	0.14610389610389612
leaving_home	Yes - I am scared for my health	occupation	occupation_Worker	0.04334440573604472	0.01666883708816252	0.013258336681398152	-0.0266755686478822	-0.003410500406764369
leaving_home	Yes - I am scared for my health	has_condition	has_condition_I_have_a_neurological_condition	0.07425742574257425	0.041189931350114416	0.04519774011299435	-0.03306749439245984	0.004007808762879934
leaving_home	Yes - I am scared for my health	has_condition	has_condition_I_have_a_psychiatric_condition	0.06618464961067853	0.025869759143621766	0.0392156862745098	-0.04031489046705677	0.013345927130888037
leaving_home	Yes - I am scared for my health	has_condition	has_condition_I_have_both_a_psychiatric_and_a_neurological_condition	0.061068702290076333	0.021739130434782608	0.030303030303030304	-0.039329571855293725	0.008563899868247696
leaving_home	Yes - I am scared for my health	has_condition	has_condition_No	0.05419946763323328	0.016795983569146508	0.014153245485602733	-0.03740348406408677	-0.0026427380835437747
leaving_home	Yes - I am scared for my health	drug_use_frequency	drug_use_frequency_Daily	0.03587443946188341	0.016666666666666666	0.027777777777777776	-0.01920777279521674	0.01111111111111111
leaving_home	Yes - I am scared for my health	drug_use_frequency	drug_use_frequency_Less_than_yearly	0.05911089399120664	0.01818181818181818	0.021897810218978103	-0.04092907580938846	0.0037159920371599223
leaving_home	Yes - I am scared for my health	drug_use_frequency	drug_use_frequency_Monthly	0.029411764705882353	0.008620689655172414	0.0	-0.02079107505070994	-0.008620689655172414
leaving_home	Yes - I am scared for my health	drug_use_frequency	drug_use_frequency_Never_used	0.05826152116897715	0.018997574777687955	0.015984015984015984	-0.03926394639128919	-0.0030135587936719714
leaving_home	Yes - I am scared for my health	drug_use_frequency	drug_use_frequency_Unknown_use	0.055288461538461536	0.019038774088692825	0.018102372034956304	-0.03624968744976871	-0.0009364020537365216
leaving_home	Yes - I am scared for my health	drug_use_frequency	drug_use_frequency_Weekly	0.030042918454935622	0.015384615384615385	0.0	-0.014658303070320237	-0.015384615384615385
leaving_home	Yes - I am scared for my health	drug_use_frequency	drug_use_frequency_Yearly	0.046625766871165646	0.015267175572519083	0.009259259259259259	-0.031358591298646564	-0.006007916313259825
leaving_home	Yes - I am scared for my health	wellbeing_bucket	wellbeing_bucket_high_wellbeing	0.04635149886640356	0.007569011576135352	0.009852216748768473	-0.0387824872902682	0.0022832051726331213
leaving_home	Yes - I am scared for my health	wellbeing_bucket	wellbeing_bucket_low_wellbeing	0.08028673835125448	0.035196687370600416	0.023255813953488372	-0.045090050980654064	-0.011940873417112044
leaving_home	Yes - I am scared for my health	wellbeing_bucket	wellbeing_bucket_medium_wellbeing	0.06750871080139373	0.02220888355342137	0.022009966777408636	-0.04529982724797236	-0.0001989167760127336
leaving_home	Yes - I am scared for my health	online_bucket	online_bucket_between_10h_and_14h	0.05475206611570248	0.01866251944012442	0.03535353535353535	-0.03608954667557806	0.016691015913410934
leaving_home	Yes - I am scared for my health	online_bucket	online_bucket_between_2h_and_4h	0.05928974241731443	0.017083120856705762	0.01397712833545108	-0.04220662156060867	-0.003105992521254682
leaving_home	Yes - I am scared for my health	online_bucket	online_bucket_between_4h_and_6h	0.05939086294416244	0.020522388059701493	0.023529411764705882	-0.03886847488446095	0.0030070237050043892
leaving_home	Yes - I am scared for my health	online_bucket	online_bucket_between_6h_and_8h	0.04773869346733668	0.022932592077831826	0.02631578947368421	-0.024806101389504856	0.003383197395852383
leaving_home	Yes - I am scared for my health	online_bucket	online_bucket_between_8h_and_10h	0.04891994917407878	0.025984911986588432	0.008670520231213872	-0.02293503718749035	-0.01731439175537456
leaving_home	Yes - I am scared for my health	online_bucket	online_bucket_less_than_2h	0.05377574370709382	0.013333333333333334	0.012658227848101266	-0.040442410373760486	-0.0006751054852320686
leaving_home	Yes - I am scared for my health	online_bucket	online_bucket_more_than_14h	0.06905370843989769	0.026455026455026454	0.04838709677419355	-0.04259868198487124	0.021932070319167093
leaving_home	Yes - For other reasons	age_bucket	age_bucket_18_to_30	0.13564984964918142	0.039953676896352056	0.036011080332409975	-0.09569617275282936	-0.00394259656394208
leaving_home	Yes - For other reasons	age_bucket	age_bucket_31_to_40	0.14366666666666666	0.04632152588555858	0.04892367906066536	-0.09734514078110809	0.002602153175106779
leaving_home	Yes - For other reasons	age_bucket	age_bucket_41_to_50	0.1381597923276608	0.053037171350861285	0.04	-0.08512262097679951	-0.013037171350861285
leaving_home	Yes - For other reasons	age_bucket	age_bucket_51_to_60	0.11461139896373057	0.039687703318152245	0.040160642570281124	-0.07492369564557833	0.0004729392521288789
leaving_home	Yes - For other reasons	age_bucket	age_bucket_61_to_70	0.08537438768369489	0.024563901744393022	0.024495677233429394	-0.06081048593930187	-6.822451096362772e-05
leaving_home	Yes - For other reasons	age_bucket	age_bucket_above_70	0.06790123456790123	0.025157232704402517	0.0288659793814433	-0.042744001863498714	0.0037087466770407834
leaving_home	Yes - For other reasons	sex	sex_Female	0.12138279277529618	0.04286365709074327	0.04031650339110776	-0.0785191356845529	-0.0025471536996355126
leaving_home	Yes - For other reasons	sex	sex_Male	0.11015824400204186	0.03335568219912839	0.028070175438596492	-0.07680256180291346	-0.0052855067605319
leaving_home	Yes - For other reasons	sex	sex_Other	0.16161616161616163	0.08333333333333333	0.0	-0.0782828282828283	-0.08333333333333333
leaving_home	Yes - For other reasons	edu	edu_PhD	0.1515748031496063	0.032679738562091505	0.03571428571428571	-0.11889506458751481	0.003034547152194207
leaving_home	Yes - For other reasons	edu	edu_Primary_Elementary_school_or_less	0.05863192182410423	0.04597701149425287	0.01639344262295082	-0.01265491032985136	-0.029583568871302052
leaving_home	Yes - For other reasons	edu	edu_Secondary_school_High_school_diploma	0.10269758637008992	0.035118306351183064	0.034526854219948847	-0.06757928001890687	-0.0005914521312342172
leaving_home	Yes - For other reasons	edu	edu_University_degree	0.1214684756584198	0.04062019477191184	0.03551136363636364	-0.08084828088650796	-0.005108831135548199
leaving_home	Yes - For other reasons	ethnicity	ethnicity_American_Hispanic	0.12643678160919541	0.022598870056497175	0.0	-0.10383791155269824	-0.022598870056497175
leaving_home	Yes - For other reasons	ethnicity	ethnicity_East_Asian	0.14987080103359174	0.04326923076923077	0.0625	-0.10660157026436097	0.019230769230769232
leaving_home	Yes - For other reasons	ethnicity	ethnicity_Indian_South_Asian_or_South_East_Asian	0.14878048780487804	0.0761904761904762	0.015384615384615385	-0.07259001161440184	-0.06080586080586081
leaving_home	Yes - For other reasons	ethnicity	ethnicity_Mixed_ethnicity	0.1570048309178744	0.07456140350877193	0.058823529411764705	-0.08244342740910247	-0.01573787409700722
leaving_home	Yes - For other reasons	ethnicity	ethnicity_Other	0.15894039735099338	0.0	0.047619047619047616	-0.15894039735099338	0.047619047619047616
leaving_home	Yes - For other reasons	ethnicity	ethnicity_Unknown	0.112	0.05555555555555555	0.09090909090909091	-0.05644444444444445	0.03535353535353536
leaving_home	Yes - For other reasons	ethnicity	ethnicity_White_European_or_North_American	0.11325379964046413	0.03745382699080835	0.03452217649748514	-0.07579997264965578	-0.0029316504933232096
leaving_home	Yes - For other reasons	residence	residence_Abroad	0.0979498861047836	0.05	0.050761421319796954	-0.047949886104783596	0.000761421319796951
leaving_home	Yes - For other reasons	residence	residence_United_Kingdom	0.11740397350993377	0.038103092783505155	0.03424350940017905	-0.07930088072642862	-0.0038595833833261067
leaving_home	Yes - For other reasons	occupation	occupation_Disabled_Not_applicable_Sheltered_employment	0.17117117117117117	0.08396946564885496	0.06976744186046512	-0.08720170552231621	-0.014202023788389848
leaving_home	Yes - For other reasons	occupation	occupation_Homemaker	0.12883435582822086	0.07598784194528875	0.07874015748031496	-0.052846513882932114	0.002752315535026209
leaving_home	Yes - For other reasons	occupation	occupation_Retired	0.08505790772735902	0.0262182958107723	0.029043280182232345	-0.05883961191658672	0.002824984371460046
leaving_home	Yes - For other reasons	occupation	occupation_Student	0.1355475763016158	0.057724957555178265	0.045112781954887216	-0.07782261874643753	-0.01261217560029105
leaving_home	Yes - For other reasons	occupation	occupation_Unemployed_Looking_for_work	0.15963855421686746	0.052941176470588235	0.04716981132075472	-0.10669737774627922	-0.005771365149833514
leaving_home	Yes - For other reasons	occupation	occupation_Unknown	0.0967741935483871	0.03571428571428571	0.0	-0.06105990783410138	-0.03571428571428571
leaving_home	Yes - For other reasons	occupation	occupation_Worker	0.1239568986470064	0.03971871337413726	0.035355564483728404	-0.08423818527286914	-0.004363148890408855
leaving_home	Yes - For other reasons	has_condition	has_condition_I_have_a_neurological_condition	0.11551155115511551	0.034324942791762014	0.05649717514124294	-0.0811866083633535	0.022172232349480923
leaving_home	Yes - For other reasons	has_condition	has_condition_I_have_a_psychiatric_condition	0.1507230255839822	0.08296164139161463	0.0700280112044818	-0.06776138419236757	-0.012933630187132839
leaving_home	Yes - For other reasons	has_condition	has_condition_I_have_both_a_psychiatric_and_a_neurological_condition	0.183206106870229	0.09782608695652174	0.15151515151515152	-0.08538001991370726	0.053689064558629776
leaving_home	Yes - For other reasons	has_condition	has_condition_No	0.11213682958599988	0.03368324965769055	0.030014641288433383	-0.07845357992830933	-0.0036686083692571703
leaving_home	Yes - For other reasons	drug_use_frequency	drug_use_frequency_Daily	0.16591928251121077	0.06666666666666667	0.1111111111111111	-0.0992526158445441	0.04444444444444444
leaving_home	Yes - For other reasons	drug_use_frequency	drug_use_frequency_Less_than_yearly	0.1338544211040547	0.037171717171717175	0.037712895377128956	-0.09668270393233754	0.0005411782054117811
leaving_home	Yes - For other reasons	drug_use_frequency	drug_use_frequency_Monthly	0.15775401069518716	0.034482758620689655	0.03508771929824561	-0.1232712520744975	0.0006049606775559574
leaving_home	Yes - For other reasons	drug_use_frequency	drug_use_frequency_Never_used	0.1164293742974897	0.03637833468067906	0.03196803196803197	-0.08005103961681065	-0.004410302712647092
leaving_home	Yes - For other reasons	drug_use_frequency	drug_use_frequency_Unknown_use	0.10250686813186813	0.03900626886463896	0.033083645443196	-0.06350059926722917	-0.005922623421442959
leaving_home	Yes - For other reasons	drug_use_frequency	drug_use_frequency_Weekly	0.1072961373390558	0.03076923076923077	0.07894736842105263	-0.07652690656982503	0.048178137651821856
leaving_home	Yes - For other reasons	drug_use_frequency	drug_use_frequency_Yearly	0.13496932515337423	0.06615776081424936	0.05555555555555555	-0.06881156433912487	-0.010602205258693806
leaving_home	Yes - For other reasons	wellbeing_bucket	wellbeing_bucket_high_wellbeing	0.10924510874128811	0.023820124666073018	0.0180623973727422	-0.0854249840752151	-0.005757727293330819
leaving_home	Yes - For other reasons	wellbeing_bucket	wellbeing_bucket_low_wellbeing	0.14050179211469535	0.0862663906142167	0.06046511627906977	-0.05423540150047865	-0.025801274335146937
leaving_home	Yes - For other reasons	wellbeing_bucket	wellbeing_bucket_medium_wellbeing	0.12311265969802555	0.03811524609843937	0.04318936877076412	-0.08499741359958618	0.005074122672324745
leaving_home	Yes - For other reasons	online_bucket	online_bucket_between_10h_and_14h	0.12913223140495866	0.04043545878693624	0.025252525252525252	-0.08869677261802242	-0.015182933534410987
leaving_home	Yes - For other reasons	online_bucket	online_bucket_between_2h_and_4h	0.10973936899862825	0.03671596124426313	0.03811944091486658	-0.07302340775436512	0.0014034796706034539
leaving_home	Yes - For other reasons	online_bucket	online_bucket_between_4h_and_6h	0.11725888324873096	0.04337686567164179	0.0392156862745098	-0.07388201757708918	-0.004161179397131988
leaving_home	Yes - For other reasons	online_bucket	online_bucket_between_6h_and_8h	0.14154103852596314	0.05350938151494093	0.043859649122807015	-0.08803165701102221	-0.009649732392133917
leaving_home	Yes - For other reasons	online_bucket	online_bucket_between_8h_and_10h	0.1531130876747141	0.051969823973176864	0.031791907514450865	-0.10114326370153723	-0.020177916458726
leaving_home	Yes - For other reasons	online_bucket	online_bucket_less_than_2h	0.09496567505720824	0.0224390243902439	0.02610759493670886	-0.07252665066696434	0.0036685705464649596
leaving_home	Yes - For other reasons	online_bucket	online_bucket_more_than_14h	0.11253196930946291	0.07936507936507936	0.06451612903225806	-0.03316688994438355	-0.014848950332821298
leaving_home	No not anymore	age_bucket	age_bucket_18_to_30	0.25626461744069495	0.5147654892877823	0.5734072022160664	0.25850087184708737	0.05864171292828413
leaving_home	No not anymore	age_bucket	age_bucket_31_to_40	0.21	0.5051771117166213	0.48532289628180036	0.2951771117166213	-0.01985421543482091
leaving_home	No not anymore	age_bucket	age_bucket_41_to_50	0.18950100951831556	0.4669084315503173	0.45037037037037037	0.27740742203200175	-0.01653806117994694
leaving_home	No not anymore	age_bucket	age_bucket_51_to_60	0.17347150259067357	0.47104749512036437	0.45461847389558235	0.2975759925296908	-0.016429021224782014
leaving_home	No not anymore	age_bucket	age_bucket_61_to_70	0.15605318404478657	0.5268778924884301	0.5007204610951008	0.3708247084436435	-0.026157431393329267
leaving_home	No not anymore	age_bucket	age_bucket_above_70	0.14506172839506173	0.5408805031446541	0.5030927835051546	0.3958187747495924	-0.03778771963949945
leaving_home	No not anymore	sex	sex_Female	0.2018838609438726	0.5260677914576684	0.5135644310474755	0.3241839305137958	-0.012503360410192843
leaving_home	No not anymore	sex	sex_Male	0.17366003062787136	0.4696614146832048	0.44661654135338347	0.2960013840553335	-0.023044873329821358
leaving_home	No not anymore	sex	sex_Other	0.15151515151515152	0.45	0.625	0.29848484848484846	0.175
leaving_home	No not anymore	edu	edu_PhD	0.16633858267716536	0.5441176470588235	0.5267857142857143	0.3777790643816581	-0.017331932773109182
leaving_home	No not anymore	edu	edu_Primary_Elementary_school_or_less	0.21498371335504887	0.5	0.5245901639344263	0.28501628664495116	0.024590163934426257
leaving_home	No not anymore	edu	edu_Secondary_school_High_school_diploma	0.18204764158384604	0.4647571606475716	0.48081841432225064	0.28270951906372555	0.016061253674679032
leaving_home	No not anymore	edu	edu_University_degree	0.1920191540303272	0.513070220399795	0.4836647727272727	0.3210510663694678	-0.02940544767252229
leaving_home	No not anymore	ethnicity	ethnicity_American_Hispanic	0.21839080459770116	0.4971751412429379	0.49019607843137253	0.2787843366452367	-0.006979062811565351
leaving_home	No not anymore	ethnicity	ethnicity_East_Asian	0.19121447028423771	0.5	0.4375	0.3087855297157623	-0.0625
leaving_home	No not anymore	ethnicity	ethnicity_Indian_South_Asian_or_South_East_Asian	0.21707317073170732	0.4666666666666667	0.4307692307692308	0.24959349593495936	-0.03589743589743588
leaving_home	No not anymore	ethnicity	ethnicity_Mixed_ethnicity	0.21980676328502416	0.4956140350877193	0.47058823529411764	0.27580727180269515	-0.025025799793601644
leaving_home	No not anymore	ethnicity	ethnicity_Other	0.2052980132450331	0.5072463768115942	0.5714285714285714	0.30194836356656113	0.06418219461697716
leaving_home	No not anymore	ethnicity	ethnicity_Unknown	0.16	0.4722222222222222	0.45454545454545453	0.3122222222222222	-0.01767676767676768
leaving_home	No not anymore	ethnicity	ethnicity_White_European_or_North_American	0.1859781009968949	0.4997852418177133	0.4867398262459991	0.3138071408208184	-0.01304541557171418
leaving_home	No not anymore	residence	residence_Abroad	0.19817767653758542	0.45416666666666666	0.4720812182741117	0.2559889901290813	0.01791455160744504
leaving_home	No not anymore	residence	residence_United_Kingdom	0.1872317880794702	0.5007835051546392	0.48589973142345566	0.31355171707516905	-0.014883773731183547
leaving_home	No not anymore	occupation	occupation_Disabled_Not_applicable_Sheltered_employment	0.11261261261261261	0.37404580152671757	0.3488372093023256	0.26143318891410494	-0.02520859222439198
leaving_home	No not anymore	occupation	occupation_Homemaker	0.1656441717791411	0.5258358662613982	0.49606299212598426	0.36019169448225713	-0.029772874135413963
leaving_home	No not anymore	occupation	occupation_Retired	0.15511676476172395	0.5300655457395269	0.5039863325740319	0.37494878097780293	-0.026079213165494997
leaving_home	No not anymore	occupation	occupation_Student	0.26570915619389585	0.49745331069609505	0.5939849624060151	0.2317441545021992	0.09653165170992001
leaving_home	No not anymore	occupation	occupation_Unemployed_Looking_for_work	0.1566265060240964	0.47352941176470587	0.3867924528301887	0.3169029057406095	-0.08673695893451716
leaving_home	No not anymore	occupation	occupation_Unknown	0.11827956989247312	0.5	0.45454545454545453	0.3817204301075269	-0.04545454545454547
leaving_home	No not anymore	occupation	occupation_Worker	0.19938426638580573	0.4870425836697487	0.4724789071916432	0.287658317283943	-0.01456367647810547
leaving_home	No not anymore	has_condition	has_condition_I_have_a_neurological_condition	0.14686468646864687	0.43249427917620137	0.4293785310734463	0.2856295927075545	-0.003115748102755056
leaving_home	No not anymore	has_condition	has_condition_I_have_a_psychiatric_condition	0.18687430478309233	0.487957181088314	0.49299719887955185	0.3010828763052217	0.005040017791237861
leaving_home	No not anymore	has_condition	has_condition_I_have_both_a_psychiatric_and_a_neurological_condition	0.13740458015267176	0.41304347826086957	0.3939393939393939	0.2756388981081978	-0.019104084321475645
leaving_home	No not anymore	has_condition	has_condition_No	0.1898397236223594	0.5035143769968051	0.4877989263055149	0.3136746533744457	-0.01571545069129021
leaving_home	No not anymore	drug_use_frequency	drug_use_frequency_Daily	0.15695067264573992	0.5	0.5	0.3430493273542601	0.0
leaving_home	No not anymore	drug_use_frequency	drug_use_frequency_Less_than_yearly	0.18466047874938935	0.49292929292929294	0.4793187347931874	0.3082688141799036	-0.013610558136105566
leaving_home	No not anymore	drug_use_frequency	drug_use_frequency_Monthly	0.232620320855615	0.5301724137931034	0.47368421052631576	0.2975520929374884	-0.05648820326678766
leaving_home	No not anymore	drug_use_frequency	drug_use_frequency_Never_used	0.17000749344323718	0.5012126111560227	0.49000999000999	0.3312051177127855	-0.011202621146032654
leaving_home	No not anymore	drug_use_frequency	drug_use_frequency_Unknown_use	0.2125686813186813	0.4945437659623868	0.48064918851435706	0.28197508464370546	-0.013894577448029743
leaving_home	No not anymore	drug_use_frequency	drug_use_frequency_Weekly	0.27467811158798283	0.5153846153846153	0.5526315789473685	0.2407065037966325	0.037246963562753144
leaving_home	No not anymore	drug_use_frequency	drug_use_frequency_Yearly	0.2184049079754601	0.5343511450381679	0.49074074074074076	0.31594623706270786	-0.043610404297427185
leaving_home	No not anymore	wellbeing_bucket	wellbeing_bucket_high_wellbeing	0.17205474850953062	0.4804096170970614	0.4548440065681445	0.3083548685875308	-0.025565610528916927
leaving_home	No not anymore	wellbeing_bucket	wellbeing_bucket_low_wellbeing	0.18853046594982079	0.4409937888198758	0.4744186046511628	0.252463322870055	0.033424815831287036
leaving_home	No not anymore	wellbeing_bucket	wellbeing_bucket_medium_wellbeing	0.21530197444831592	0.5241596638655462	0.5103820598006644	0.30885768941723035	-0.013777604064881821
leaving_home	No not anymore	online_bucket	online_bucket_between_10h_and_14h	0.17665289256198347	0.4494556765163297	0.4292929292929293	0.27280278395434626	-0.020162747223400446
leaving_home	No not anymore	online_bucket	online_bucket_between_2h_and_4h	0.1929583904892547	0.5028046914839368	0.4834815756035578	0.30984630099468213	-0.019323115880378994
leaving_home	No not anymore	online_bucket	online_bucket_between_4h_and_6h	0.20025380710659899	0.5368470149253731	0.5098039215686274	0.3365932078187741	-0.027043093356745707
leaving_home	No not anymore	online_bucket	online_bucket_between_6h_and_8h	0.20351758793969849	0.49895760945100764	0.46271929824561403	0.29544002151130916	-0.036238311205393614
leaving_home	No not anymore	online_bucket	online_bucket_between_8h_and_10h	0.1670902160101652	0.4844928751047779	0.49421965317919075	0.31740265909461274	0.009726778074412856
leaving_home	No not anymore	online_bucket	online_bucket_less_than_2h	0.1748283752860412	0.4900813008130081	0.4865506329113924	0.31525292552696693	-0.003530667901615714
leaving_home	No not anymore	online_bucket	online_bucket_more_than_14h	0.1432225063938619	0.3968253968253968	0.5	0.25360289043153494	0.1031746031746032
leaving_home	Yes - I dont trust others to be sensible	age_bucket	age_bucket_18_to_30	0.2716338122285332	0.1459177764910249	0.09141274238227147	-0.12571603573750834	-0.05450503410875342
leaving_home	Yes - I dont trust others to be sensible	age_bucket	age_bucket_31_to_40	0.261	0.13950953678474115	0.09784735812133072	-0.12149046321525886	-0.04166217866341043
leaving_home	Yes - I dont trust others to be sensible	age_bucket	age_bucket_41_to_50	0.21286414767810788	0.1056210335448776	0.09333333333333334	-0.10724311413323027	-0.012287700211544267
leaving_home	Yes - I dont trust others to be sensible	age_bucket	age_bucket_51_to_60	0.2039378238341969	0.09173715029277814	0.07389558232931727	-0.11220067354141876	-0.01784156796346087
leaving_home	Yes - I dont trust others to be sensible	age_bucket	age_bucket_61_to_70	0.20900396547702357	0.08615165539337842	0.07997118155619597	-0.12285231008364515	-0.006180473837182454
leaving_home	Yes - I dont trust others to be sensible	age_bucket	age_bucket_above_70	0.20925925925925926	0.07966457023060797	0.07628865979381444	-0.1295946890286513	-0.0033759104367935278
leaving_home	Yes - I dont trust others to be sensible	sex	sex_Female	0.24587298504563992	0.11263109895120839	0.08477769404672193	-0.13324188609443155	-0.027853404904486456
leaving_home	Yes - I dont trust others to be sensible	sex	sex_Male	0.20275650842266463	0.09822326516929265	0.07919799498746867	-0.10453324325337197	-0.019025270181823983
leaving_home	Yes - I dont trust others to be sensible	sex	sex_Other	0.35353535353535354	0.23333333333333334	0.1875	-0.1202020202020202	-0.04583333333333334
leaving_home	Yes - I dont trust others to be sensible	edu	edu_PhD	0.22440944881889763	0.12091503267973856	0.08928571428571429	-0.10349441613915907	-0.031629318394024275
leaving_home	Yes - I dont trust others to be sensible	edu	edu_Primary_Elementary_school_or_less	0.19218241042345277	0.06896551724137931	0.06557377049180328	-0.12321689318207346	-0.0033917467495760273
leaving_home	Yes - I dont trust others to be sensible	edu	edu_Secondary_school_High_school_diploma	0.22606089288531314	0.10933997509339975	0.08439897698209718	-0.11672091779191339	-0.02494099811130257
leaving_home	Yes - I dont trust others to be sensible	edu	edu_University_degree	0.22609736632083	0.10456176319835982	0.08167613636363637	-0.12153560312247018	-0.02288562683472345
leaving_home	Yes - I dont trust others to be sensible	ethnicity	ethnicity_American_Hispanic	0.20977011494252873	0.12994350282485875	0.09803921568627451	-0.07982661211766998	-0.031904287138584245
leaving_home	Yes - I dont trust others to be sensible	ethnicity	ethnicity_East_Asian	0.26098191214470284	0.14423076923076922	0.1875	-0.11675114291393363	0.04326923076923078
leaving_home	Yes - I dont trust others to be sensible	ethnicity	ethnicity_Indian_South_Asian_or_South_East_Asian	0.23414634146341465	0.18095238095238095	0.12307692307692308	-0.0531939605110337	-0.057875457875457864
leaving_home	Yes - I dont trust others to be sensible	ethnicity	ethnicity_Mixed_ethnicity	0.21014492753623187	0.12719298245614036	0.10294117647058823	-0.08295194508009152	-0.024251805985552127
leaving_home	Yes - I dont trust others to be sensible	ethnicity	ethnicity_Other	0.24503311258278146	0.17391304347826086	0.14285714285714285	-0.0711200691045206	-0.031055900621118016
leaving_home	Yes - I dont trust others to be sensible	ethnicity	ethnicity_Unknown	0.256	0.09722222222222222	0.045454545454545456	-0.1587777777777778	-0.05176767676767677
leaving_home	Yes - I dont trust others to be sensible	ethnicity	ethnicity_White_European_or_North_American	0.2248188701857602	0.10325573404346705	0.0800182898948331	-0.12156313614229314	-0.02323744414863395
leaving_home	Yes - I dont trust others to be sensible	residence	residence_Abroad	0.21716021260440393	0.13541666666666666	0.10152284263959391	-0.08174354593773728	-0.03389382402707275
leaving_home	Yes - I dont trust others to be sensible	residence	residence_United_Kingdom	0.2260662251655629	0.10523711340206185	0.0819158460161146	-0.12082911176350106	-0.023321267385947253
leaving_home	Yes - I dont trust others to be sensible	occupation	occupation_Disabled_Not_applicable_Sheltered_employment	0.2702702702702703	0.17557251908396945	0.32558139534883723	-0.09469775118630083	0.15000887626486778
leaving_home	Yes - I dont trust others to be sensible	occupation	occupation_Homemaker	0.28016359918200406	0.12158054711246201	0.07086614173228346	-0.15858305206954204	-0.050714405380178545
leaving_home	Yes - I dont trust others to be sensible	occupation	occupation_Retired	0.2099867097019176	0.0834995725277857	0.07232346241457858	-0.1264871371741319	-0.011176110113207113
leaving_home	Yes - I dont trust others to be sensible	occupation	occupation_Student	0.25763016157989227	0.14431239388794567	0.10526315789473684	-0.1133177676919466	-0.039049235993208836
leaving_home	Yes - I dont trust others to be sensible	occupation	occupation_Unemployed_Looking_for_work	0.2319277108433735	0.1411764705882353	0.14150943396226415	-0.0907512402551382	0.0003329633740288551
leaving_home	Yes - I dont trust others to be sensible	occupation	occupation_Unknown	0.25806451612903225	0.03571428571428571	0.0	-0.22235023041474655	-0.03571428571428571
leaving_home	Yes - I dont trust others to be sensible	occupation	occupation_Worker	0.22563396256987767	0.1108217215783305	0.0831659300924066	-0.11481224099154716	-0.02765579148592391
leaving_home	Yes - I dont trust others to be sensible	has_condition	has_condition_I_have_a_neurological_condition	0.2722772277227723	0.15789473684210525	0.12429378531073447	-0.11438249088066704	-0.033600951531370785
leaving_home	Yes - I dont trust others to be sensible	has_condition	has_condition_I_have_a_psychiatric_condition	0.29977753058954393	0.18108831400535236	0.15966386554621848	-0.11868921658419157	-0.021424448459133882
leaving_home	Yes - I dont trust others to be sensible	has_condition	has_condition_I_have_both_a_psychiatric_and_a_neurological_condition	0.32061068702290074	0.2717391304347826	0.18181818181818182	-0.04887155658811815	-0.08992094861660077
leaving_home	Yes - I dont trust others to be sensible	has_condition	has_condition_No	0.21560854052217251	0.09529895025102693	0.07345046364080039	-0.12030959027114559	-0.021848486610226536
leaving_home	Yes - I dont trust others to be sensible	drug_use_frequency	drug_use_frequency_Daily	0.22869955156950672	0.14166666666666666	0.1111111111111111	-0.08703288490284006	-0.030555555555555558
leaving_home	Yes - I dont trust others to be sensible	drug_use_frequency	drug_use_frequency_Less_than_yearly	0.22813873961895456	0.12080808080808081	0.08759124087591241	-0.10733065881087375	-0.033216839932168396
leaving_home	Yes - I dont trust others to be sensible	drug_use_frequency	drug_use_frequency_Monthly	0.20588235294117646	0.09482758620689655	0.08771929824561403	-0.11105476673427991	-0.007108287961282517
leaving_home	Yes - I dont trust others to be sensible	drug_use_frequency	drug_use_frequency_Never_used	0.2368864743349569	0.10064672594987874	0.07692307692307693	-0.13623974838507819	-0.02372364902680181
leaving_home	Yes - I dont trust others to be sensible	drug_use_frequency	drug_use_frequency_Unknown_use	0.2084478021978022	0.10633851869050383	0.0867665418227216	-0.10210928350729838	-0.019571976867782226
leaving_home	Yes - I dont trust others to be sensible	drug_use_frequency	drug_use_frequency_Weekly	0.15021459227467812	0.09230769230769231	0.05263157894736842	-0.05790689996698581	-0.039676113360323895
leaving_home	Yes - I dont trust others to be sensible	drug_use_frequency	drug_use_frequency_Yearly	0.22085889570552147	0.089058524173028	0.09259259259259259	-0.13180037153249347	0.0035340684195645927
leaving_home	Yes - I dont trust others to be sensible	wellbeing_bucket	wellbeing_bucket_high_wellbeing	0.1891006801578638	0.06567230632235084	0.05747126436781609	-0.12342837383551296	-0.008201041954534749
leaving_home	Yes - I dont trust others to be sensible	wellbeing_bucket	wellbeing_bucket_low_wellbeing	0.33620071684587816	0.20496894409937888	0.18372093023255814	-0.13123177274649928	-0.021248013866820736
leaving_home	Yes - I dont trust others to be sensible	wellbeing_bucket	wellbeing_bucket_medium_wellbeing	0.2659698025551684	0.11239495798319328	0.08388704318936877	-0.15357484457197512	-0.028507914793824515
leaving_home	Yes - I dont trust others to be sensible	online_bucket	online_bucket_between_10h_and_14h	0.3212809917355372	0.20373250388802489	0.1717171717171717	-0.11754848784751232	-0.03201533217085317
leaving_home	Yes - I dont trust others to be sensible	online_bucket	online_bucket_between_2h_and_4h	0.2089620484682213	0.09306476287608363	0.0724269377382465	-0.11589728559213767	-0.02063782513783713
leaving_home	Yes - I dont trust others to be sensible	online_bucket	online_bucket_between_4h_and_6h	0.24187817258883249	0.10587686567164178	0.07973856209150326	-0.1360013069171907	-0.026138303580138522
leaving_home	Yes - I dont trust others to be sensible	online_bucket	online_bucket_between_6h_and_8h	0.25	0.12300208478109799	0.11842105263157894	-0.12699791521890202	-0.004581032149519049
leaving_home	Yes - I dont trust others to be sensible	online_bucket	online_bucket_between_8h_and_10h	0.28081321473951715	0.15171835708298406	0.13005780346820808	-0.12909485765653309	-0.02166055361477598
leaving_home	Yes - I dont trust others to be sensible	online_bucket	online_bucket_less_than_2h	0.1745995423340961	0.07284552845528455	0.05775316455696203	-0.10175401387881156	-0.015092363898322525
leaving_home	Yes - I dont trust others to be sensible	online_bucket	online_bucket_more_than_14h	0.2966751918158568	0.19047619047619047	0.08064516129032258	-0.10619900133966631	-0.10983102918586789
leaving_home	Yes - I am shielding	age_bucket	age_bucket_18_to_30	0.02372201804209823	0.010422698320787493	0.008310249307479225	-0.013299319721310736	-0.0021124490133082683
leaving_home	Yes - I am shielding	age_bucket	age_bucket_31_to_40	0.027333333333333334	0.013079019073569483	0.005870841487279843	-0.014254314259763852	-0.00720817758628964
leaving_home	Yes - I am shielding	age_bucket	age_bucket_41_to_50	0.032016152293048744	0.014052583862194016	0.014814814814814815	-0.017963568430854726	0.0007622309526207991
leaving_home	Yes - I am shielding	age_bucket	age_bucket_51_to_60	0.039585492227979274	0.01951854261548471	0.017670682730923693	-0.020066949612494563	-0.0018478598845610185
leaving_home	Yes - I am shielding	age_bucket	age_bucket_61_to_70	0.057849311873104735	0.02029191883232467	0.012968299711815562	-0.03755739304078007	-0.007323619120509108
leaving_home	Yes - I am shielding	age_bucket	age_bucket_above_70	0.1271604938271605	0.0440251572327044	0.03917525773195876	-0.0831353365944561	-0.004849899500745637
leaving_home	Yes - I am shielding	sex	sex_Female	0.044571761507088754	0.019911840705274356	0.015071590052750565	-0.024659920801814398	-0.004840250652523791
leaving_home	Yes - I am shielding	sex	sex_Male	0.04563552833078101	0.016426416359369762	0.017543859649122806	-0.029209111971411246	0.0011174432897530437
leaving_home	Yes - I am shielding	sex	sex_Other	0.030303030303030304	0.05	0.0	0.0196969696969697	-0.05
leaving_home	Yes - I am shielding	edu	edu_PhD	0.06496062992125984	0.026143790849673203	0.026785714285714284	-0.03881683907158663	0.0006419234360410808
leaving_home	Yes - I am shielding	edu	edu_Primary_Elementary_school_or_less	0.07166123778501629	0.017241379310344827	0.03278688524590164	-0.05441985847467146	0.015545505935556814
leaving_home	Yes - I am shielding	edu	edu_Secondary_school_High_school_diploma	0.049061366146079824	0.024657534246575342	0.017902813299232736	-0.024403831899504482	-0.006754720947342606
leaving_home	Yes - I am shielding	edu	edu_University_degree	0.040702314445331206	0.01460789338800615	0.013849431818181818	-0.026094421057325054	-0.000758461569824332
leaving_home	Yes - I am shielding	ethnicity	ethnicity_American_Hispanic	0.07183908045977011	0.01694915254237288	0.0392156862745098	-0.05488992791739723	0.022266533732136922
leaving_home	Yes - I am shielding	ethnicity	ethnicity_East_Asian	0.04909560723514212	0.004807692307692308	0.015625	-0.04428791492744981	0.010817307692307692
leaving_home	Yes - I am shielding	ethnicity	ethnicity_Indian_South_Asian_or_South_East_Asian	0.05121951219512195	0.03333333333333333	0.046153846153846156	-0.017886178861788615	0.012820512820512824
leaving_home	Yes - I am shielding	ethnicity	ethnicity_Mixed_ethnicity	0.043478260869565216	0.021929824561403508	0.0	-0.02154843630816171	-0.021929824561403508
leaving_home	Yes - I am shielding	ethnicity	ethnicity_Other	0.052980132450331126	0.014492753623188406	0.0	-0.03848737882714272	-0.014492753623188406
leaving_home	Yes - I am shielding	ethnicity	ethnicity_Unknown	0.056	0.027777777777777776	0.045454545454545456	-0.028222222222222225	0.01767676767676768
leaving_home	Yes - I am shielding	ethnicity	ethnicity_White_European_or_North_American	0.04417933213488043	0.018297397130830683	0.015546410608139003	-0.025881935004049745	-0.0027509865226916803
leaving_home	Yes - I am shielding	residence	residence_Abroad	0.10858010630220197	0.029166666666666667	0.02030456852791878	-0.0794134396355353	-0.008862098138747887
leaving_home	Yes - I am shielding	residence	residence_United_Kingdom	0.04058278145695364	0.01797938144329897	0.015890778871978515	-0.02260340001365467	-0.0020886025713204547
leaving_home	Yes - I am shielding	occupation	occupation_Disabled_Not_applicable_Sheltered_employment	0.18468468468468469	0.1450381679389313	0.09302325581395349	-0.039646516745753396	-0.0520149121249778
leaving_home	Yes - I am shielding	occupation	occupation_Homemaker	0.065439672801636	0.0182370820668693	0.031496062992125984	-0.047202590734766695	0.013258980925256684
leaving_home	Yes - I am shielding	occupation	occupation_Retired	0.07803303588380482	0.025933314334568254	0.02050113895216401	-0.05209972154923657	-0.005432175382404245
leaving_home	Yes - I am shielding	occupation	occupation_Student	0.03321364452423698	0.015280135823429542	0.007518796992481203	-0.01793350870080744	-0.007761338830948339
leaving_home	Yes - I am shielding	occupation	occupation_Unemployed_Looking_for_work	0.06626506024096386	0.029411764705882353	0.02830188679245283	-0.03685329553508151	-0.0011098779134295217
leaving_home	Yes - I am shielding	occupation	occupation_Unknown	0.10752688172043011	0.0	0.09090909090909091	-0.10752688172043011	0.09090909090909091
leaving_home	Yes - I am shielding	occupation	occupation_Worker	0.027059871992222314	0.012631853105873161	0.010445962233828847	-0.014428018886349153	-0.0021858908720443146
leaving_home	Yes - I am shielding	has_condition	has_condition_I_have_a_neurological_condition	0.11386138613861387	0.057208237986270026	0.05084745762711865	-0.05665314815234384	-0.006360780359151379
leaving_home	Yes - I am shielding	has_condition	has_condition_I_have_a_psychiatric_condition	0.04282536151279199	0.020517395182872437	0.011204481792717087	-0.022307966329919552	-0.00931291339015535
leaving_home	Yes - I am shielding	has_condition	has_condition_I_have_both_a_psychiatric_and_a_neurological_condition	0.12213740458015267	0.06521739130434782	0.06060606060606061	-0.05692001327580484	-0.0046113306982872165
leaving_home	Yes - I am shielding	has_condition	has_condition_No	0.04230616752562723	0.016248288452761297	0.014641288433382138	-0.02605787907286593	-0.0016070000193791588
leaving_home	Yes - I am shielding	drug_use_frequency	drug_use_frequency_Daily	0.06726457399103139	0.016666666666666666	0.0	-0.05059790732436473	-0.016666666666666666
leaving_home	Yes - I am shielding	drug_use_frequency	drug_use_frequency_Less_than_yearly	0.04103566194430874	0.01696969696969697	0.015815085158150853	-0.024065964974611772	-0.0011546118115461183
leaving_home	Yes - I am shielding	drug_use_frequency	drug_use_frequency_Monthly	0.0427807486631016	0.01293103448275862	0.017543859649122806	-0.029849714180342983	0.0046128251663641855
leaving_home	Yes - I am shielding	drug_use_frequency	drug_use_frequency_Never_used	0.04917572124391158	0.018795472918350847	0.014985014985014986	-0.03038024832556073	-0.0038104579333358615
leaving_home	Yes - I am shielding	drug_use_frequency	drug_use_frequency_Unknown_use	0.039663461538461536	0.01927095426050615	0.016853932584269662	-0.020392507277955385	-0.0024170216762364888
leaving_home	Yes - I am shielding	drug_use_frequency	drug_use_frequency_Weekly	0.04721030042918455	0.046153846153846156	0.0	-0.0010564542753383963	-0.046153846153846156
leaving_home	Yes - I am shielding	drug_use_frequency	drug_use_frequency_Yearly	0.033128834355828224	0.007633587786259542	0.037037037037037035	-0.025495246569568683	0.029403449250777494
leaving_home	Yes - I am shielding	wellbeing_bucket	wellbeing_bucket_high_wellbeing	0.04433621630699471	0.01402493321460374	0.013683634373289545	-0.03031128309239097	-0.00034129884131419395
leaving_home	Yes - I am shielding	wellbeing_bucket	wellbeing_bucket_low_wellbeing	0.047311827956989246	0.028985507246376812	0.027906976744186046	-0.018326320710612434	-0.0010785305021907658
leaving_home	Yes - I am shielding	wellbeing_bucket	wellbeing_bucket_medium_wellbeing	0.04573170731707317	0.019057623049219687	0.015780730897009966	-0.026674084267853483	-0.0032768921522097205
leaving_home	Yes - I am shielding	online_bucket	online_bucket_between_10h_and_14h	0.05991735537190083	0.027993779160186624	0.04040404040404041	-0.031923576211714204	0.012410261243853783
leaving_home	Yes - I am shielding	online_bucket	online_bucket_between_2h_and_4h	0.04420057918000305	0.01988781234064253	0.018424396442185513	-0.02431276683936052	-0.0014634158984570163
leaving_home	Yes - I am shielding	online_bucket	online_bucket_between_4h_and_6h	0.04263959390862944	0.01585820895522388	0.01568627450980392	-0.026781384953405558	-0.00017193444541995992
leaving_home	Yes - I am shielding	online_bucket	online_bucket_between_6h_and_8h	0.04061976549413735	0.01667824878387769	0.006578947368421052	-0.02394151671025966	-0.01009930141545664
leaving_home	Yes - I am shielding	online_bucket	online_bucket_between_8h_and_10h	0.053367217280813214	0.02347024308466052	0.023121387283236993	-0.029896974196152695	-0.00034885580142352685
leaving_home	Yes - I am shielding	online_bucket	online_bucket_less_than_2h	0.044393592677345536	0.013333333333333334	0.010284810126582278	-0.0310602593440122	-0.0030485232067510564
leaving_home	Yes - I am shielding	online_bucket	online_bucket_more_than_14h	0.04603580562659847	0.047619047619047616	0.03225806451612903	0.0015832419924491498	-0.015360983102918585
nhs	No I dont want to be tracked	age_bucket	age_bucket_18_to_30	0.17086217747010699	0.13012575177692728	0.18848167539267016	-0.0407364256931797	0.05835592361574288
nhs	No I dont want to be tracked	age_bucket	age_bucket_31_to_40	0.19307086614173227	0.13465553235908143	0.21150278293135436	-0.05841533378265085	0.07684725057227293
nhs	No I dont want to be tracked	age_bucket	age_bucket_41_to_50	0.17394934595045922	0.11482622085349758	0.1847041847041847	-0.05912312509696163	0.06987796385068712
nhs	No I dont want to be tracked	age_bucket	age_bucket_51_to_60	0.15931520644511582	0.1023447401774398	0.17327117327117328	-0.05697046626767602	0.07092643309373348
nhs	No I dont want to be tracked	age_bucket	age_bucket_61_to_70	0.11752577319587629	0.08523325149070501	0.1332388377037562	-0.03229252170517127	0.04800558621305118
nhs	No I dont want to be tracked	age_bucket	age_bucket_above_70	0.08875379939209727	0.0811088295687885	0.1565040650406504	-0.00764496982330877	0.0753952354718619
nhs	No I dont want to be tracked	sex	sex_Female	0.1598796200507853	0.11193257430134555	0.18672501823486506	-0.04794704574943974	0.07479244393351951
nhs	No I dont want to be tracked	sex	sex_Male	0.1487919858573954	0.10369410239792612	0.1412512218963832	-0.04509788345946927	0.03755711949845708
nhs	No I dont want to be tracked	sex	sex_Other	0.1509433962264151	0.078125	0.0625	-0.07281839622641509	-0.015625
nhs	No I dont want to be tracked	edu	edu_PhD	0.15844402277039848	0.11181102362204724	0.12334801762114538	-0.04663299914835124	0.011536993999098133
nhs	No I dont want to be tracked	edu	edu_Primary_Elementary_school_or_less	0.1550632911392405	0.12222222222222222	0.16923076923076924	-0.03284106891701828	0.04700854700854702
nhs	No I dont want to be tracked	edu	edu_Secondary_school_High_school_diploma	0.1532135242156564	0.0986905916585839	0.16770186335403728	-0.054522932557072495	0.06901127169545337
nhs	No I dont want to be tracked	edu	edu_University_degree	0.15471698113207547	0.1119106699751861	0.1698828394210889	-0.04280631115688936	0.05797216944590279
nhs	No I dont want to be tracked	ethnicity	ethnicity_American_Hispanic	0.181058495821727	0.12834224598930483	0.17647058823529413	-0.05271624983242218	0.0481283422459893
nhs	No I dont want to be tracked	ethnicity	ethnicity_East_Asian	0.17206982543640897	0.13023255813953488	0.2	-0.04183726729687409	0.06976744186046513
nhs	No I dont want to be tracked	ethnicity	ethnicity_Indian_South_Asian_or_South_East_Asian	0.15242494226327943	0.16	0.18840579710144928	0.00757505773672057	0.028405797101449276
nhs	No I dont want to be tracked	ethnicity	ethnicity_Mixed_ethnicity	0.1736111111111111	0.09745762711864407	0.10144927536231885	-0.07615348399246703	0.003991648243674775
nhs	No I dont want to be tracked	ethnicity	ethnicity_Other	0.18181818181818182	0.1111111111111111	0.2727272727272727	-0.07070707070707072	0.1616161616161616
nhs	No I dont want to be tracked	ethnicity	ethnicity_Unknown	0.11904761904761904	0.12	0.08695652173913043	0.0009523809523809545	-0.03304347826086956
nhs	No I dont want to be tracked	ethnicity	ethnicity_White_European_or_North_American	0.15317021836358852	0.10626407540245225	0.16692563817980022	-0.046906142961136266	0.060661562777347966
nhs	No I dont want to be tracked	residence	residence_Abroad	0.1411764705882353	0.10685483870967742	0.12871287128712872	-0.03432163187855787	0.021858032577451295
nhs	No I dont want to be tracked	residence	residence_United_Kingdom	0.15536015541127754	0.10789410541470047	0.16862233811386354	-0.04746604999657707	0.06072823269916307
nhs	No I dont want to be tracked	occupation	occupation_Disabled_Not_applicable_Sheltered_employment	0.15879828326180256	0.072992700729927	0.06521739130434782	-0.08580558253187556	-0.007775309425579177
nhs	No I dont want to be tracked	occupation	occupation_Homemaker	0.18359375	0.09467455621301775	0.20610687022900764	-0.08891919378698225	0.1114323140159899
nhs	No I dont want to be tracked	occupation	occupation_Retired	0.1077698916697796	0.08235294117647059	0.14038031319910516	-0.025416950493309012	0.05802737202263457
nhs	No I dont want to be tracked	occupation	occupation_Student	0.16115351993214588	0.11003236245954692	0.15328467153284672	-0.05112115747259896	0.0432523090732998
nhs	No I dont want to be tracked	occupation	occupation_Unemployed_Looking_for_work	0.18285714285714286	0.15159574468085107	0.15315315315315314	-0.03126139817629178	0.0015574084723020687
nhs	No I dont want to be tracked	occupation	occupation_Unknown	0.20588235294117646	0.06896551724137931	0.25	-0.13691683569979715	0.1810344827586207
nhs	No I dont want to be tracked	occupation	occupation_Worker	0.17008021182150923	0.11839616693985626	0.18611865063978286	-0.05168404488165297	0.0677224836999266
nhs	No I dont want to be tracked	has_condition	has_condition_I_have_a_neurological_condition	0.10771704180064309	0.07555555555555556	0.1358695652173913	-0.03216148624508754	0.06031400966183574
nhs	No I dont want to be tracked	has_condition	has_condition_I_have_a_psychiatric_condition	0.14179894179894179	0.09693877551020408	0.17297297297297298	-0.04486016628873771	0.0760341974627689
nhs	No I dont want to be tracked	has_condition	has_condition_I_have_both_a_psychiatric_and_a_neurological_condition	0.15037593984962405	0.10309278350515463	0.08823529411764706	-0.04728315634446942	-0.01485748938750757
nhs	No I dont want to be tracked	has_condition	has_condition_No	0.1573648500766032	0.11032280950691735	0.16840607210626185	-0.04704204056968585	0.0580832625993445
nhs	No I dont want to be tracked	drug_use_frequency	drug_use_frequency_Daily	0.17886178861788618	0.15503875968992248	0.17073170731707318	-0.023823028927963702	0.015692947627150705
nhs	No I dont want to be tracked	drug_use_frequency	drug_use_frequency_Less_than_yearly	0.15956948993916706	0.10129057489245209	0.1630952380952381	-0.058278915046714966	0.061804663202786006
nhs	No I dont want to be tracked	drug_use_frequency	drug_use_frequency_Monthly	0.1700507614213198	0.17338709677419356	0.12903225806451613	0.003336335352873754	-0.044354838709677435
nhs	No I dont want to be tracked	drug_use_frequency	drug_use_frequency_Never_used	0.1509399691217873	0.10671392006300452	0.16122747199220652	-0.04422604905878279	0.054513551929202
nhs	No I dont want to be tracked	drug_use_frequency	drug_use_frequency_Unknown_use	0.15347602455616394	0.1071509136025265	0.17462235649546828	-0.046325110953637436	0.06747144289294178
nhs	No I dont want to be tracked	drug_use_frequency	drug_use_frequency_Weekly	0.248	0.14184397163120568	0.325	-0.10615602836879431	0.18315602836879433
nhs	No I dont want to be tracked	drug_use_frequency	drug_use_frequency_Yearly	0.15186915887850466	0.10436893203883495	0.1504424778761062	-0.047500226839669715	0.04607354583727126
nhs	No I dont want to be tracked	wellbeing_bucket	wellbeing_bucket_high_wellbeing	0.15400929929031731	0.09845012006112203	0.15161290322580645	-0.05555917922919529	0.053162783164684424
nhs	No I dont want to be tracked	wellbeing_bucket	wellbeing_bucket_low_wellbeing	0.15290102389078497	0.11396574440052701	0.18930957683741648	-0.03893527949025796	0.07534383243688947
nhs	No I dont want to be tracked	wellbeing_bucket	wellbeing_bucket_medium_wellbeing	0.1554814506044185	0.1127536231884058	0.1743486973947896	-0.042727827416012706	0.061595074206383785
nhs	No I dont want to be tracked	online_bucket	online_bucket_between_10h_and_14h	0.14708785784797632	0.09333333333333334	0.16908212560386474	-0.05375452451464298	0.0757487922705314
nhs	No I dont want to be tracked	online_bucket	online_bucket_between_2h_and_4h	0.1607037256061502	0.1130952380952381	0.17879161528976573	-0.04760848751091211	0.06569637719452763
nhs	No I dont want to be tracked	online_bucket	online_bucket_between_4h_and_6h	0.14888943129118867	0.10139702568724651	0.1620253164556962	-0.04749240560394216	0.060628290768449694
nhs	No I dont want to be tracked	online_bucket	online_bucket_between_6h_and_8h	0.14509018036072144	0.11162790697674418	0.16666666666666666	-0.033462273383977253	0.05503875968992247
nhs	No I dont want to be tracked	online_bucket	online_bucket_between_8h_and_10h	0.1431159420289855	0.09546925566343042	0.12359550561797752	-0.04764668636555508	0.0281262499545471
nhs	No I dont want to be tracked	online_bucket	online_bucket_less_than_2h	0.15942028985507245	0.11104020421186982	0.16718266253869968	-0.04838008564320263	0.05614245832682986
nhs	No I dont want to be tracked	online_bucket	online_bucket_more_than_14h	0.17274939172749393	0.12121212121212122	0.15873015873015872	-0.05153727051537271	0.037518037518037506
nhs	No I dont trust what the government will do with that data	age_bucket	age_bucket_18_to_30	0.11076148521082442	0.09021323127392017	0.12041884816753927	-0.02054825393690425	0.0302056168936191
nhs	No I dont trust what the government will do with that data	age_bucket	age_bucket_31_to_40	0.11590551181102363	0.08977035490605428	0.1038961038961039	-0.026135156904969342	0.01412574899004962
nhs	No I dont trust what the government will do with that data	age_bucket	age_bucket_41_to_50	0.10075146117450598	0.08095028596568411	0.07503607503607504	-0.019801175208821867	-0.005914210929609073
nhs	No I dont trust what the government will do with that data	age_bucket	age_bucket_51_to_60	0.09425981873111783	0.07699619771863118	0.07536907536907538	-0.017263621012486643	-0.0016271223495558096
nhs	No I dont trust what the government will do with that data	age_bucket	age_bucket_61_to_70	0.07262313860252005	0.044896527534198524	0.05244507441530829	-0.027726611068321527	0.007548546881109765
nhs	No I dont trust what the government will do with that data	age_bucket	age_bucket_above_70	0.057750759878419454	0.043121149897330596	0.03048780487804878	-0.014629609981088858	-0.012633345019281816
nhs	No I dont trust what the government will do with that data	sex	sex_Female	0.08492429229756418	0.0638769776726305	0.06965718453683442	-0.021047314624933686	0.005780206864203927
nhs	No I dont trust what the government will do with that data	sex	sex_Male	0.10204282066391672	0.08020090732339598	0.07233626588465299	-0.02184191334052074	-0.007864641438742992
nhs	No I dont trust what the government will do with that data	sex	sex_Other	0.18867924528301888	0.109375	0.0625	-0.07930424528301888	-0.046875
nhs	No I dont trust what the government will do with that data	edu	edu_PhD	0.09867172675521822	0.08031496062992126	0.07048458149779736	-0.018356766125296964	-0.009830379132123895
nhs	No I dont trust what the government will do with that data	edu	edu_Primary_Elementary_school_or_less	0.07911392405063292	0.06111111111111111	0.07692307692307693	-0.018002812939521808	0.015811965811965818
nhs	No I dont trust what the government will do with that data	edu	edu_Secondary_school_High_school_diploma	0.0909229363387146	0.06886517943743937	0.07080745341614907	-0.02205775690127522	0.001942273978709691
nhs	No I dont trust what the government will do with that data	edu	edu_University_degree	0.09518675394686177	0.07295285359801489	0.07064093728463129	-0.022233900348846883	-0.002311916313383594
nhs	No I dont trust what the government will do with that data	ethnicity	ethnicity_American_Hispanic	0.08356545961002786	0.0962566844919786	0.058823529411764705	0.01269122488195075	-0.0374331550802139
nhs	No I dont trust what the government will do with that data	ethnicity	ethnicity_East_Asian	0.09226932668329177	0.09302325581395349	0.046153846153846156	0.000753929130661718	-0.04686940966010733
nhs	No I dont trust what the government will do with that data	ethnicity	ethnicity_Indian_South_Asian_or_South_East_Asian	0.14318706697459585	0.12444444444444444	0.11594202898550725	-0.01874262253015141	-0.008502415458937193
nhs	No I dont trust what the government will do with that data	ethnicity	ethnicity_Mixed_ethnicity	0.13657407407407407	0.1016949152542373	0.14492753623188406	-0.034879158819836775	0.04323262097764677
nhs	No I dont trust what the government will do with that data	ethnicity	ethnicity_Other	0.15757575757575756	0.18055555555555555	0.09090909090909091	0.02297979797979799	-0.08964646464646464
nhs	No I dont trust what the government will do with that data	ethnicity	ethnicity_Unknown	0.1349206349206349	0.09333333333333334	0.043478260869565216	-0.041587301587301576	-0.04985507246376812
nhs	No I dont trust what the government will do with that data	ethnicity	ethnicity_White_European_or_North_American	0.09108129439621153	0.06872966886312452	0.06947835738068812	-0.022351625533087005	0.0007486885175636004
nhs	No I dont trust what the government will do with that data	residence	residence_Abroad	0.08088235294117647	0.08064516129032258	0.0594059405940594	-0.00023719165085389626	-0.021239220696263175
nhs	No I dont trust what the government will do with that data	residence	residence_United_Kingdom	0.09467818618680027	0.07150283931856355	0.07127335940895263	-0.023175346868236718	-0.00022947990961091902
nhs	No I dont trust what the government will do with that data	occupation	occupation_Disabled_Not_applicable_Sheltered_employment	0.09012875536480687	0.11678832116788321	0.17391304347826086	0.026659565803076338	0.05712472231037766
nhs	No I dont trust what the government will do with that data	occupation	occupation_Homemaker	0.103515625	0.06804733727810651	0.09923664122137404	-0.03546828772189349	0.031189303943267535
nhs	No I dont trust what the government will do with that data	occupation	occupation_Retired	0.06387747478520732	0.0453781512605042	0.04530201342281879	-0.01849932352470312	-7.613783768541105e-05
nhs	No I dont trust what the government will do with that data	occupation	occupation_Student	0.10178117048346055	0.10032362459546926	0.08759124087591241	-0.0014575458879912961	-0.012732383719556845
nhs	No I dont trust what the government will do with that data	occupation	occupation_Unemployed_Looking_for_work	0.12714285714285714	0.14095744680851063	0.10810810810810811	0.013814589665653493	-0.03284933870040252
nhs	No I dont trust what the government will do with that data	occupation	occupation_Unknown	0.1568627450980392	0.13793103448275862	0.25	-0.018931710615280595	0.11206896551724138
nhs	No I dont trust what the government will do with that data	occupation	occupation_Worker	0.10287360797445681	0.0774177279031648	0.08181465684373788	-0.025455880071292014	0.004396928940573086
nhs	No I dont trust what the government will do with that data	has_condition	has_condition_I_have_a_neurological_condition	0.09807073954983923	0.07111111111111111	0.10326086956521739	-0.026959628438728123	0.03214975845410628
nhs	No I dont trust what the government will do with that data	has_condition	has_condition_I_have_a_psychiatric_condition	0.10634920634920635	0.10629251700680271	0.0972972972972973	-5.668934240363188e-05	-0.008995219709505411
nhs	No I dont trust what the government will do with that data	has_condition	has_condition_I_have_both_a_psychiatric_and_a_neurological_condition	0.12781954887218044	0.14432989690721648	0.11764705882352941	0.016510348035036038	-0.02668283808368707
nhs	No I dont trust what the government will do with that data	has_condition	has_condition_No	0.09208798424162837	0.06766583894998227	0.06665085388994307	-0.024422145291646102	-0.0010149850600391919
nhs	No I dont trust what the government will do with that data	drug_use_frequency	drug_use_frequency_Daily	0.13821138211382114	0.14728682170542637	0.21951219512195122	0.009075439591605228	0.07222537341652485
nhs	No I dont trust what the government will do with that data	drug_use_frequency	drug_use_frequency_Less_than_yearly	0.11230697239120262	0.087211576065702	0.07261904761904762	-0.02509539632550062	-0.014592528446654374
nhs	No I dont trust what the government will do with that data	drug_use_frequency	drug_use_frequency_Monthly	0.12436548223350254	0.12096774193548387	0.12903225806451613	-0.0033977402980186616	0.008064516129032251
nhs	No I dont trust what the government will do with that data	drug_use_frequency	drug_use_frequency_Never_used	0.0805558078285351	0.05670407560543414	0.06137359961032635	-0.023851732223100955	0.004669524004892213
nhs	No I dont trust what the government will do with that data	drug_use_frequency	drug_use_frequency_Unknown_use	0.10303633648581384	0.07128355515452289	0.07371601208459215	-0.03175278133129095	0.0024324569300692572
nhs	No I dont trust what the government will do with that data	drug_use_frequency	drug_use_frequency_Weekly	0.128	0.10638297872340426	0.075	-0.021617021276595746	-0.03138297872340426
nhs	No I dont trust what the government will do with that data	drug_use_frequency	drug_use_frequency_Yearly	0.11565420560747663	0.10436893203883495	0.09734513274336283	-0.011285273568641688	-0.007023799295472116
nhs	No I dont trust what the government will do with that data	wellbeing_bucket	wellbeing_bucket_high_wellbeing	0.0825515947467167	0.05108055009823183	0.0521505376344086	-0.03147104464848487	0.001069987536176771
nhs	No I dont trust what the government will do with that data	wellbeing_bucket	wellbeing_bucket_low_wellbeing	0.12901023890784982	0.09749670619235837	0.0935412026726058	-0.031513532715491455	-0.003955503519752573
nhs	No I dont trust what the government will do with that data	wellbeing_bucket	wellbeing_bucket_medium_wellbeing	0.10573850215367514	0.08	0.08056112224448898	-0.02573850215367514	0.0005611222444889818
nhs	No I dont trust what the government will do with that data	online_bucket	online_bucket_between_10h_and_14h	0.1125370187561698	0.0962962962962963	0.0966183574879227	-0.0162407224598735	0.00032206119162640767
nhs	No I dont trust what the government will do with that data	online_bucket	online_bucket_between_2h_and_4h	0.0898876404494382	0.06299603174603174	0.06720098643649815	-0.026891608703406455	0.004204954690466403
nhs	No I dont trust what the government will do with that data	online_bucket	online_bucket_between_4h_and_6h	0.0998291432755675	0.07931500675980171	0.07848101265822785	-0.02051413651576578	-0.000833994101573865
nhs	No I dont trust what the government will do with that data	online_bucket	online_bucket_between_6h_and_8h	0.1094188376753507	0.09435215946843854	0.07805907172995781	-0.015066678206912154	-0.016293087738480733
nhs	No I dont trust what the government will do with that data	online_bucket	online_bucket_between_8h_and_10h	0.11654589371980677	0.09466019417475728	0.09831460674157304	-0.021885699545049486	0.0036544125668157568
nhs	No I dont trust what the government will do with that data	online_bucket	online_bucket_less_than_2h	0.07157190635451505	0.05137204850031908	0.0565015479876161	-0.020199857854195966	0.005129499487297018
nhs	No I dont trust what the government will do with that data	online_bucket	online_bucket_more_than_14h	0.1070559610705596	0.09595959595959595	0.06349206349206349	-0.011096365110963652	-0.032467532467532464
nhs	No it doesnt work on my phone	age_bucket	age_bucket_18_to_30	0.13310258023914412	0.06451612903225806	0.06544502617801047	-0.06858645120688606	0.0009288971457524081
nhs	No it doesnt work on my phone	age_bucket	age_bucket_31_to_40	0.11559055118110237	0.05793319415448852	0.06493506493506493	-0.05765735702661385	0.007001870780576409
nhs	No it doesnt work on my phone	age_bucket	age_bucket_41_to_50	0.132201502922349	0.07259128904531456	0.05772005772005772	-0.05961021387703444	-0.014871231325256841
nhs	No it doesnt work on my phone	age_bucket	age_bucket_51_to_60	0.1730110775427996	0.10804816223067173	0.09013209013209013	-0.06496291531212786	-0.017916072098581606
nhs	No it doesnt work on my phone	age_bucket	age_bucket_61_to_70	0.22359679266895763	0.14731673097158893	0.11268603827072998	-0.0762800616973687	-0.034630692700858945
nhs	No it doesnt work on my phone	age_bucket	age_bucket_above_70	0.33009118541033433	0.24127310061601642	0.20528455284552846	-0.08881808479431791	-0.03598854777048796
nhs	No it doesnt work on my phone	sex	sex_Female	0.17756042509169567	0.12095224013011976	0.11232676878191102	-0.05660818496157591	-0.00862547134820875
nhs	No it doesnt work on my phone	sex	sex_Male	0.17079159300726773	0.0917044718081659	0.08162267839687194	-0.07908712119910183	-0.010081793411293963
nhs	No it doesnt work on my phone	sex	sex_Other	0.1509433962264151	0.09375	0.0625	-0.05719339622641509	-0.03125
nhs	No it doesnt work on my phone	edu	edu_PhD	0.20398481973434535	0.13385826771653545	0.14977973568281938	-0.0701265520178099	0.015921467966283936
nhs	No it doesnt work on my phone	edu	edu_Primary_Elementary_school_or_less	0.24367088607594936	0.12777777777777777	0.1076923076923077	-0.1158931082981716	-0.02008547008547007
nhs	No it doesnt work on my phone	edu	edu_Secondary_school_High_school_diploma	0.18489186719463904	0.11663433559650825	0.10124223602484472	-0.06825753159813079	-0.015392099571663528
nhs	No it doesnt work on my phone	edu	edu_University_degree	0.16457450904890258	0.09937965260545906	0.09372846312887664	-0.06519485644344353	-0.005651189476582413
nhs	No it doesnt work on my phone	ethnicity	ethnicity_American_Hispanic	0.1532033426183844	0.0748663101604278	0.058823529411764705	-0.07833703245795659	-0.016042780748663096
nhs	No it doesnt work on my phone	ethnicity	ethnicity_East_Asian	0.14962593516209477	0.06046511627906977	0.09230769230769231	-0.089160818883025	0.031842576028622546
nhs	No it doesnt work on my phone	ethnicity	ethnicity_Indian_South_Asian_or_South_East_Asian	0.21016166281755197	0.09333333333333334	0.08695652173913043	-0.11682832948421863	-0.006376811594202905
nhs	No it doesnt work on my phone	ethnicity	ethnicity_Mixed_ethnicity	0.1597222222222222	0.0847457627118644	0.07246376811594203	-0.0749764595103578	-0.012281994595922371
nhs	No it doesnt work on my phone	ethnicity	ethnicity_Other	0.15757575757575756	0.05555555555555555	0.045454545454545456	-0.10202020202020201	-0.010101010101010097
nhs	No it doesnt work on my phone	ethnicity	ethnicity_Unknown	0.15873015873015872	0.13333333333333333	0.08695652173913043	-0.02539682539682539	-0.0463768115942029
nhs	No it doesnt work on my phone	ethnicity	ethnicity_White_European_or_North_American	0.174796106287819	0.10910000834097923	0.10055493895671476	-0.06569609794683977	-0.00854506938426447
nhs	No it doesnt work on my phone	residence	residence_Abroad	0.38088235294117645	0.1532258064516129	0.12376237623762376	-0.22765654648956354	-0.029463430213989145
nhs	No it doesnt work on my phone	residence	residence_United_Kingdom	0.15975665865753286	0.10509477725345917	0.09800086918730987	-0.05466188140407369	-0.007093908066149304
nhs	No it doesnt work on my phone	occupation	occupation_Disabled_Not_applicable_Sheltered_employment	0.27896995708154504	0.19708029197080293	0.21739130434782608	-0.08188966511074211	0.020311012377023152
nhs	No it doesnt work on my phone	occupation	occupation_Homemaker	0.189453125	0.10946745562130178	0.09923664122137404	-0.07998566937869822	-0.010230814399927735
nhs	No it doesnt work on my phone	occupation	occupation_Retired	0.24747852073216287	0.16638655462184873	0.12416107382550336	-0.08109196611031413	-0.042225480796345374
nhs	No it doesnt work on my phone	occupation	occupation_Student	0.15012722646310434	0.0970873786407767	0.145985401459854	-0.05303984782232764	0.048898022819077305
nhs	No it doesnt work on my phone	occupation	occupation_Unemployed_Looking_for_work	0.23	0.14627659574468085	0.12612612612612611	-0.08372340425531916	-0.02015046961855474
nhs	No it doesnt work on my phone	occupation	occupation_Unknown	0.22549019607843138	0.1724137931034483	0.08333333333333333	-0.05307640297498309	-0.08908045977011496
nhs	No it doesnt work on my phone	occupation	occupation_Worker	0.13978662097967448	0.07716555289370823	0.07599844901124467	-0.06262106808596625	-0.0011671038824635632
nhs	No it doesnt work on my phone	has_condition	has_condition_I_have_a_neurological_condition	0.2266881028938907	0.15555555555555556	0.125	-0.07113254733833513	-0.030555555555555558
nhs	No it doesnt work on my phone	has_condition	has_condition_I_have_a_psychiatric_condition	0.17354497354497356	0.0824829931972789	0.07027027027027027	-0.09106198034769465	-0.012212722927008632
nhs	No it doesnt work on my phone	has_condition	has_condition_I_have_both_a_psychiatric_and_a_neurological_condition	0.22556390977443608	0.061855670103092786	0.20588235294117646	-0.1637082396713433	0.14402668283808367
nhs	No it doesnt work on my phone	has_condition	has_condition_No	0.17202889034799737	0.10792834338417878	0.09962049335863378	-0.06410054696381859	-0.008307850025545002
nhs	No it doesnt work on my phone	drug_use_frequency	drug_use_frequency_Daily	0.23983739837398374	0.10852713178294573	0.12195121951219512	-0.131310266591038	0.013424087729249384
nhs	No it doesnt work on my phone	drug_use_frequency	drug_use_frequency_Less_than_yearly	0.1544220870379036	0.08564724286272976	0.0761904761904762	-0.06877484417517385	-0.009456766672253564
nhs	No it doesnt work on my phone	drug_use_frequency	drug_use_frequency_Monthly	0.1548223350253807	0.05241935483870968	0.06451612903225806	-0.10240298018667102	0.012096774193548383
nhs	No it doesnt work on my phone	drug_use_frequency	drug_use_frequency_Never_used	0.18545091272364	0.12482772199251821	0.1130053580126644	-0.060623190731121795	-0.011822363979853812
nhs	No it doesnt work on my phone	drug_use_frequency	drug_use_frequency_Unknown_use	0.16542226646756264	0.10466952402436273	0.09848942598187312	-0.060752742443199906	-0.006180098042489618
nhs	No it doesnt work on my phone	drug_use_frequency	drug_use_frequency_Weekly	0.164	0.14184397163120568	0.05	-0.022156028368794323	-0.09184397163120568
nhs	No it doesnt work on my phone	drug_use_frequency	drug_use_frequency_Yearly	0.13200934579439252	0.06310679611650485	0.05309734513274336	-0.06890254967788767	-0.010009450983761492
nhs	No it doesnt work on my phone	wellbeing_bucket	wellbeing_bucket_high_wellbeing	0.18255975201892488	0.1176598995852434	0.10967741935483871	-0.06489985243368149	-0.007982480230404682
nhs	No it doesnt work on my phone	wellbeing_bucket	wellbeing_bucket_low_wellbeing	0.1645051194539249	0.09486166007905138	0.06904231625835189	-0.06964345937487353	-0.02581934382069949
nhs	No it doesnt work on my phone	wellbeing_bucket	wellbeing_bucket_medium_wellbeing	0.1617340558566069	0.10246376811594203	0.09659318637274548	-0.05927028774066488	-0.005870581743196546
nhs	No it doesnt work on my phone	online_bucket	online_bucket_between_10h_and_14h	0.13919052319842054	0.07407407407407407	0.08695652173913043	-0.06511644912434647	0.012882447665056362
nhs	No it doesnt work on my phone	online_bucket	online_bucket_between_2h_and_4h	0.17593140153755174	0.11210317460317461	0.09186189889025893	-0.06382822693437713	-0.020241275712915674
nhs	No it doesnt work on my phone	online_bucket	online_bucket_between_4h_and_6h	0.15865267268733219	0.08922938260477693	0.08860759493670886	-0.06942329008255525	-0.0006217876680680717
nhs	No it doesnt work on my phone	online_bucket	online_bucket_between_6h_and_8h	0.13907815631262524	0.07774086378737542	0.09282700421940929	-0.06133729252524982	0.015086140432033865
nhs	No it doesnt work on my phone	online_bucket	online_bucket_between_8h_and_10h	0.13949275362318841	0.07281553398058252	0.07303370786516854	-0.0666772196426059	0.0002181738845860176
nhs	No it doesnt work on my phone	online_bucket	online_bucket_less_than_2h	0.2269788182831661	0.14932992980216975	0.12925696594427244	-0.07764888848099635	-0.020072963857897308
nhs	No it doesnt work on my phone	online_bucket	online_bucket_more_than_14h	0.16058394160583941	0.07575757575757576	0.031746031746031744	-0.08482636584826365	-0.044011544011544015
