# Supplementary material for: Mapping the sociodemographic distribution and self-reported justifications for non-compliance with COVID-19 guidelines in the United Kingdom
Source: PubMed Central journal article supplement (PMC10395087; doi:10.3389/fpsyg.2023.1183789), 2023-07-19
Supplement: Table_1.pdf [file Table_1.pdf]

## *Supplementary Material*

# **Mapping the sociodemographic distribution and self-reported justifications for non-compliance with COVID-19 guidelines in the UK**

Maria Bălăeț\*, Danielle L. Kurtin, Dragos C. Gruia, Annalaura Lerede, Darije Custovic, William Trender, Amy E. Jolly, Peter J. Hellyer, Adam Hampshire

\*Corresponding author. Email: m.balaet17@imperial.ac.uk

### **This file includes:**

Supplementary Text – Full questionnaire items, Further topic modelling explanations

Figs. S1 to S9

Table S1 , S6, S7

### **Other Supplementary Materials for this manuscript include the following separate files:**

Table S5

### **Supplementary Text**

[Full questionnaire items](#)

### **Part 1 – Demographics**

1. How old are you?

From 0 to 100

2. What sex have you been assigned?

a. Male

- b. Female
- c. Other
- 3. To ensure we have a representative sample of the population, please indicate your ethnicity:
  - a. White or North American
  - b. East Asian
  - c. Indian/S/SE Asian
  - d. Mixed ethnicity
  - e. Other
  - f. Unknown
- 4. What is your residence?
  - a. United Kingdom
  - b. Abroad
- 5. What is your level of education?
  - a. Primary/elementary school or less
  - b. Secondary school/High school diploma
  - c. University Degree
  - d. PhD
- 6. What is your occupational status?
  - a. Worker
  - b. Student
  - c. Homemaker
  - d. Retired
  - e. Unemployed/looking for work
  - f. Disabled/unapplicable/sheltered employment
  - g. Unknown

## **Part 2 – Mental health and wellbeing**

These items were scored on a continuous scale from 0 to 6 and 0 to 7 respectively. The scores were grouped in three categories for analysis purposes: high wellbeing (below 20), medium wellbeing (between 20 and 40) and low wellbeing (above 40).

### The GAD-7 Questionnaire items of choice

- 1. Are you feeling nervous, anxious or on edge?
  - a. Never,
  - b. Almost never
  - c. Once or twice a week
  - d. Several times a week
  - e. Daily
  - f. Hourly
  - g. More Often
- 2. Are you not being able to stop or control worrying?
  - a. Never

- b. Almost never
- c. Once or twice a week
- d. Several times a week
- e. Daily
- f. Hourly
- g. More Often

3. Are you worrying too much about different things?

- a. Never
- b. Almost never
- c. Once or twice a week
- d. Several times a week
- e. Daily
- f. Hourly
- g. More Often

4. Are you having trouble relaxing?

- a. Never
- b. Almost never
- c. Once or twice a week
- d. Several times a week
- e. Daily
- f. Hourly
- g. More Often

5. Are you being so restless that it is hard to sit still?

- a. Never
- b. Almost never
- c. Once or twice a week
- d. Several times a week
- e. Daily
- f. Hourly
- g. More Often

6. Are you becoming easily annoyed or irritable?

- a. Never
- b. Almost never
- c. Once or twice a week
- d. Several times a week
- e. Daily
- f. Hourly
- g. More Often

7. Are you feeling afraid as if something awful might happen?

- a. Never
- b. Almost never
- c. Once or twice a week
- d. Several times a week
- e. Daily
- f. Hourly

- g. More Often

The PHQ Questionnaire items of choice

1. How often do you have little interest or pleasure in doing things?
  - a. Never
  - b. Almost never
  - c. Once or twice a week
  - d. Several times a week
  - e. Daily
  - f. Hourly
  - g. More Often
2. How often are you feeling down or depressed?
  - a. Never
  - b. Almost never
  - c. Once or twice a week
  - d. Several times a week
  - e. Daily
  - f. Hourly
  - g. More Often
3. How often are you feeling tired or having little energy?
  - a. Never
  - b. Almost never
  - c. Once or twice a week
  - d. Several times a week
  - e. Daily
  - f. Hourly
  - g. More Often
4. How often do you have trouble concentrating on things, such as reading the newspaper or watching television?
  - a. Never
  - b. Almost never
  - c. Once or twice a week
  - d. Several times a week
  - e. Daily
  - f. Hourly
  - g. More Often
5. How often are you not being able to get to sleep or stay asleep?
  - a. Never
  - b. Almost never
  - c. Once or twice a week
  - d. Several times a week
  - e. Daily
  - f. Hourly
  - g. More Often

#### Part 4 – Additional Questions

1. On average, how many hours a day do you spend online?

Choice from 0 to 24

2. Have you been diagnosed with a neurological or psychiatric condition?

- a. No
- b. I have a neurological condition
- c. I have a psychiatric condition
- d. I have both a neurological and a psychiatric condition

3. How often did you use to take recreational drugs prior to the pandemic?

- a. Never
- b. Less than yearly
- c. Yearly
- d. Monthly
- e. Weekly
- f. Daily
- g. Skip this question (unknown use)

#### Part 5 – Questions about opinion and compliance during the COVID-19 pandemic

##### Compliance questions

Compliance questions were scored on a continuous scale from 0 to 2. The total scores represented the compliance score. The vaccine questions was initially asked when vaccines were just starting to be rolled out.

1. Do you wear a mask in enclosed public spaces?

- a. Yes = 0
- b. Yes, but only because I have to = 0
- c. No, I am exempt = 0 (because this is still complying)
- d. No, I don't think it makes a difference = 2

2. Do you avoid leaving the house due to Covid?

- a. Yes, I am scared for my health = 0
- b. Yes, I am shielding = 0
- c. Yes, I don't trust others to be sensible = 0
- d. Yes, for other reasons = 0
- e. No, not anymore = 1
- f. No = 2

3. Have you followed the government guidelines about social distancing?

- a. Yes = 0
- b. Yes, most of the time = 1
- c. I used to but I have given up = 1
- d. No = 2

4. Do you use the NHS Covid-19 app?

- a. Yes = 0
  - b. No, it doesn't work on my phone = 0
  - c. No, I don't want to be tracked = 1
  - d. No, I don't trust what the government will do with that data = 1
5. When a vaccine is developed, would you get it?
- a. Yes = 0
  - b. No = 2

#### Questions about counterfactual compliance

1. When a vaccine is developed, would you get it?
- a. Yes = 0
  - b. No - Free text = 1

#### Questions about opinions

For some of the answers participants were also asked to provide their reasoning in free text form.

2. Do you feel that there are ulterior motives behind the government's response to Covid?
- a. Yes – Free text = 1
  - b. No = 0
3. Do you think that the media is hiding things from the public?
- a. Yes– Free text= 1
  - b. No= 0
4. Do you think that Covid is a naturally occurring phenomenon?
- a. Yes= 0
  - b. No – Free text= 1
5. Do you feel that current lockdown restrictions are justified?
- a. Yes = 0
  - b. Yes, but more needs to be done – Free text= 1
  - c. No – Free text= 1

#### Question about information sources

1. What are your primary sources of information about the pandemic?
- a. Word of mouth
  - b. TV News
  - c. Radio
  - d. Newspapers
  - e. Social media
  - f. Podcasts
  - g. Internet news sites
  - h. Governmental communications

### Further topic modelling explanations - Coherence

We estimated the average coherence per number of topics, ranging from 1-30 for each question (Figure S3). Coherence measures assess whether topics are more or less internally consistent; therefore, the number of topics with the highest coherence (range from 4-7) was chosen for each question as the optimal number of topics.

Then, LDA was applied using the optimal number of topics illustrated as the peaks in Figure S3 for each question.

The probabilistic graphical model of LDA is represented in Figure S4 (adopted from Syed and Spruit 2017). The topic mixtures per opinion were obtained and the top 20 opinions and words per topic were ranked based on this. Finally, the top 20 opinions associated with each topic were used to interpret and label each topic.

### Predicting individual answers to opinion and compliance questions from sociodemographic and lifestyle factors.

We performed binomial and multinomial logistic regression on the data using Python statmodels library (Seabold *et al.*, 2010) in order to identify questionnaire variables predictive of people more likely to answer a question in a distrustful/noncompliant way. The questionnaire variables investigated include sociodemographic features (age, gender, occupation, education, ethnicity and country of residence), levels of substance use, neuropsychiatric status, wellbeing and number of hours spend online per day and primary source of news about the pandemic. All empty values were dropped, and dummy variables were computed for all categorical data including the predictors and the dependent variables. The predictor categories with the highest number of participants acted as reference categories and were removed from the models. We also checked for highly correlated variables and found that questions such as those asking about mask wearing and about socially distancing had very low numbers of responses in certain categories, so those were collapsed together and the questions entered binomial rather than multinomial regression models. For each model odds ratios were calculated to reflect odds compared to the removed highest scoring dummy. Effect size (Cohen's *d*) was calculated by dividing the beta coefficients calculated in the linear regression by the square root of the *N* times the standard errors. Figure S2 illustrates the results.

**Fig. S1.**

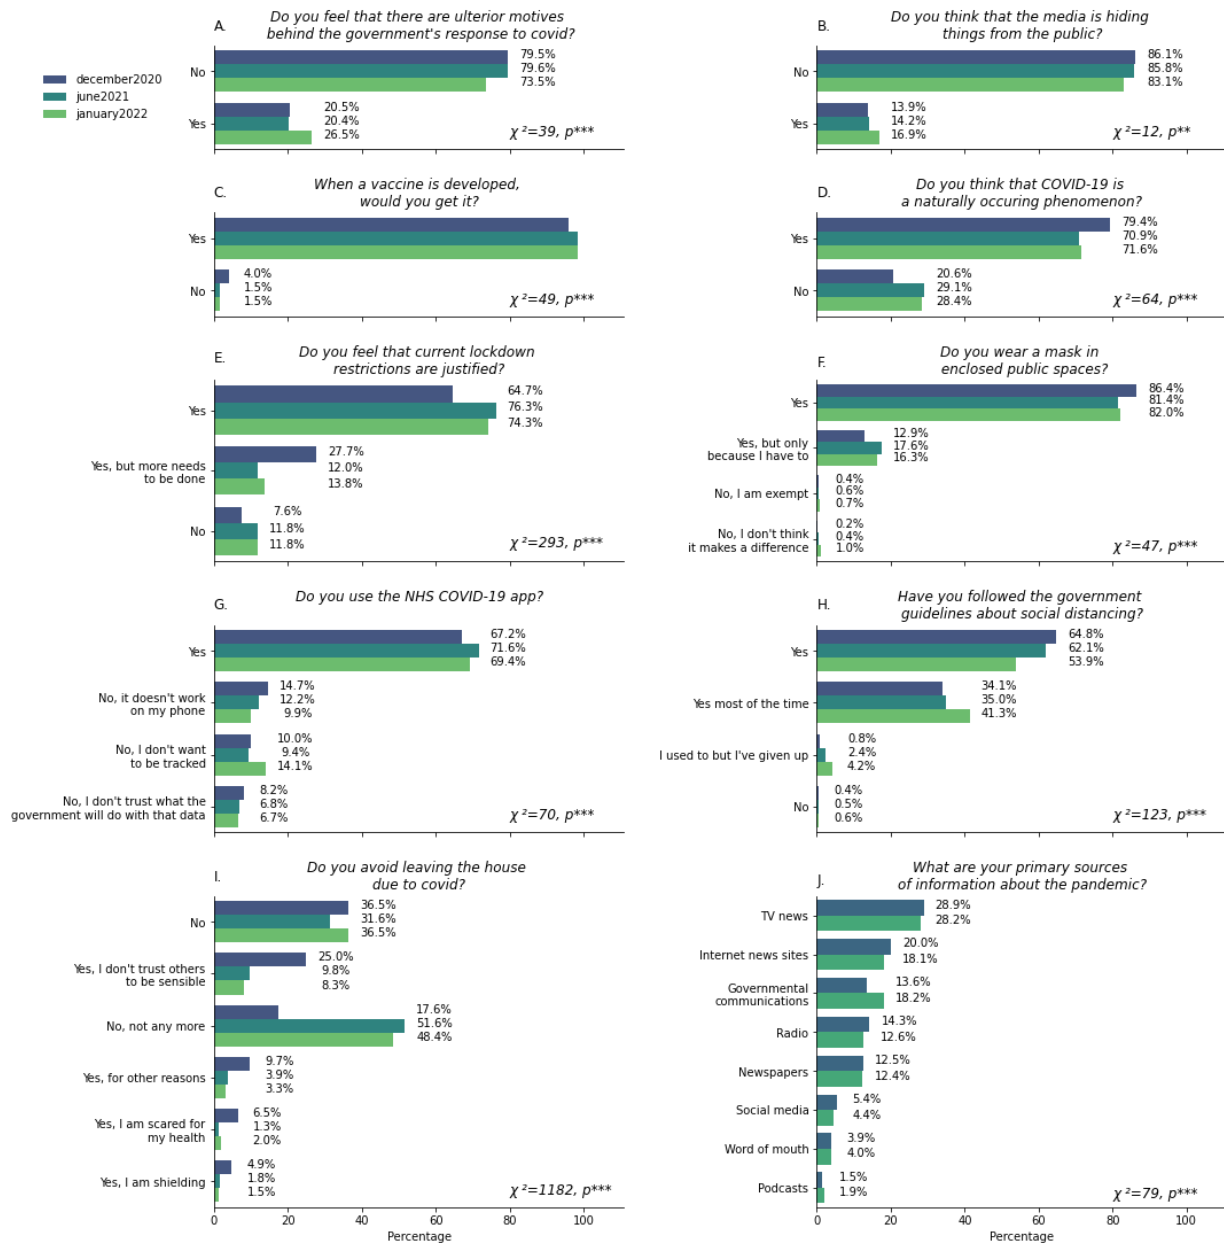

**Longitudinal distribution of beliefs, compliance and media sources.** The data presented only refers to the N=2797 respondents **who completed all three timepoints**. Panels A-E illustrate the proportions of various responses to belief-class questions. Panels F-I illustrate responses received to questions regarding compliance to measures that attempt to reduce COVID-19 transmission. Figure 1J illustrates the distribution of primary sources about the pandemic that people use. All x-axes show percentages. Each panel contains  $\chi^2$  and p values of tests for dissimilarity between the December 2020, June 2021 and January 2022 data. Answers are displayed in cascade order based on the most prevalent answers given in December 2020. Information regarding sources of



information about the pandemic was not collected in January 2022. Significance is denoted as \*, \*\*, and \*\*\* for  $p < 0.05$ ,  $p < 0.01$ , and  $p < 0.001$ , respectively.

**Fig. S2.**

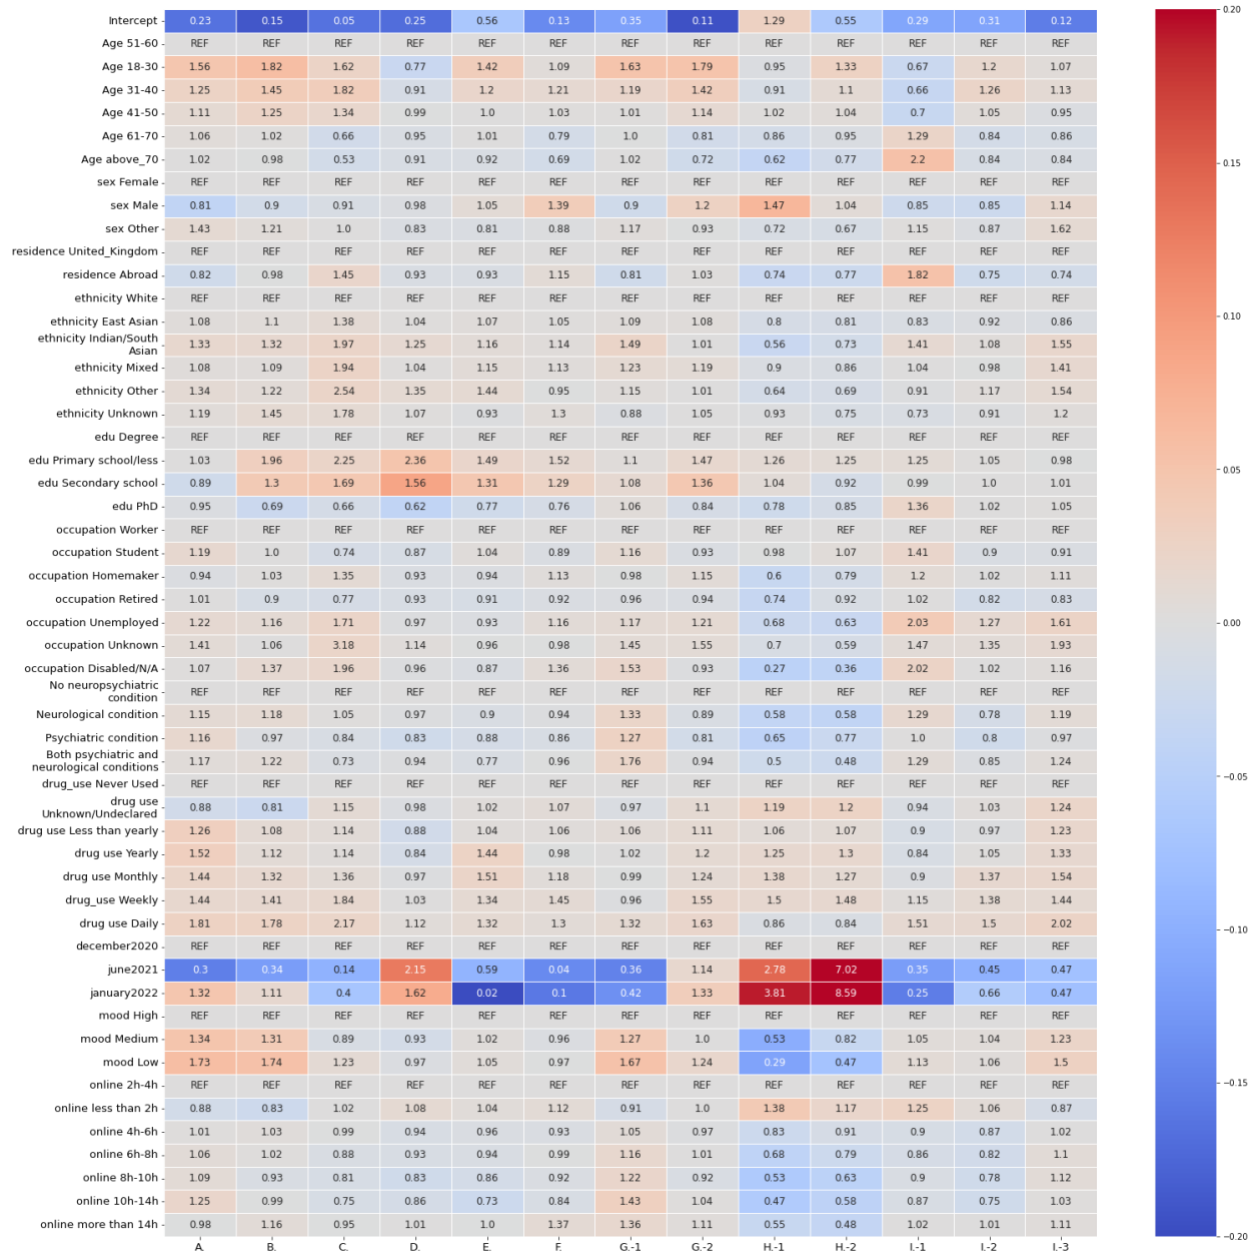

**Figure S2. Odds and effect size of holding divergent opinions or being non-compliant associated with each predictor.** The intensity represents Cohen's d effect size ( $d = 0.2$  be considered a 'small' effect size,  $0.5$  represents a 'medium' effect size and  $0.8$  a 'large' effect size) and the annotations represent odds ratios relative to the 'REF' labelled predictors. A. -Assuming gov has ulterior motives, B.- Thinking the media is hiding things, C-Refuses vaccination, D.- Thinks the virus has

unnatural origins, E.- Seldom social distances', F.- Seldom wears a mask, G.- Considers restrictions unjustified, G.-Considers more restrictions are needed, H. - Does not avoid leaving the house, H.- Does not avoid leaving the house anymore, I.- The Track&Trace app does not work on their phone, I.- Does not want to be tracked, I. - Does not trust how the government will use Track&Trace data.

**Fig. S3.**

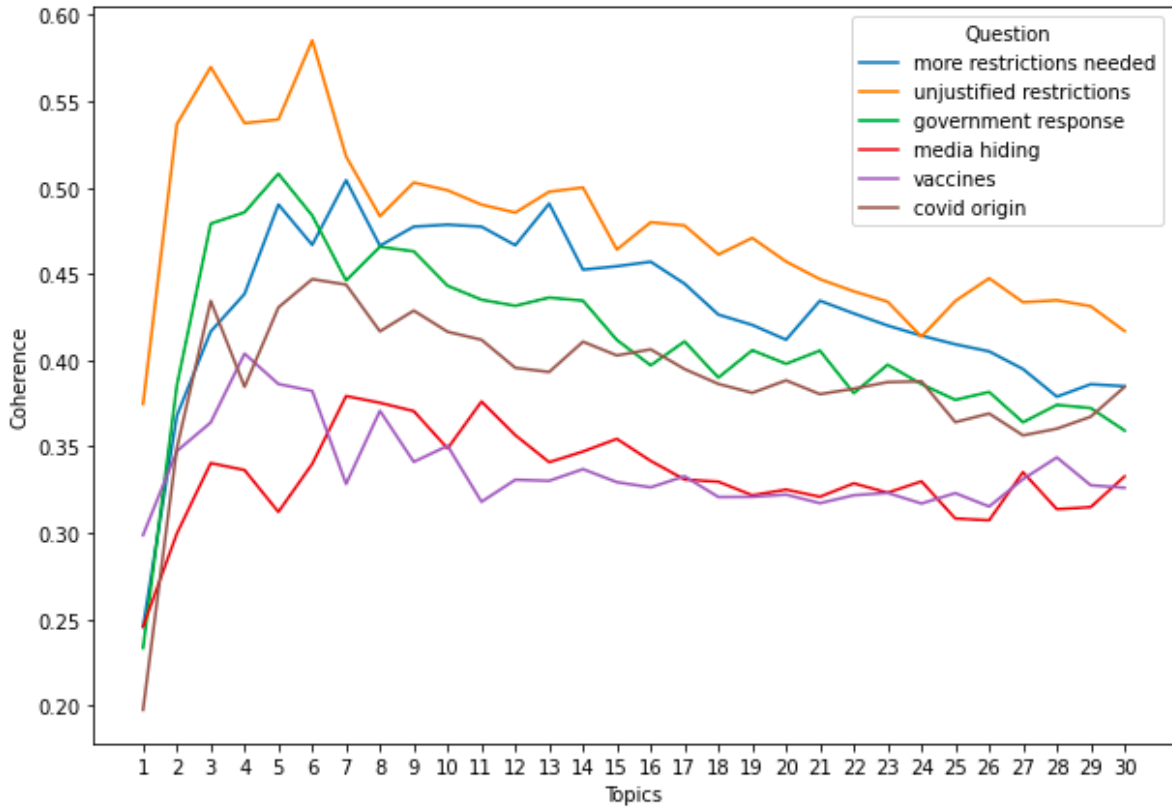

**Topic modelling evaluation.** In this figure we show the average coherence value for these questions per number of topics. Optimal topic numbers have been chosen based on the corresponding highest coherence value.

Fig. S4.

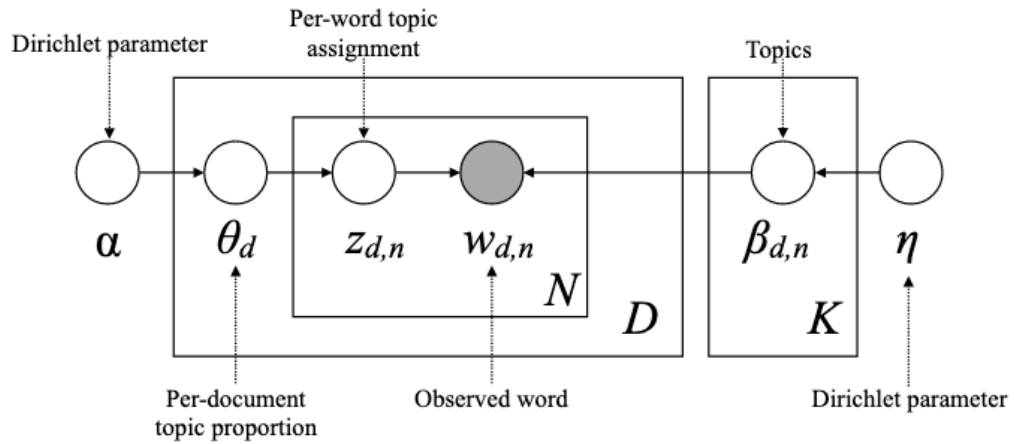

**LDA represented as a graphical model.** The nodes denote random variables. The edges represent the dependencies between random variables. The white nodes represent the hidden variables. The grey node represents the observed random variable. The boxes (plates) indicate replication. The figure has been adopted from Syed and Spruit 2017.

**Fig. S5.**

| Question 1: Why do you think restrictions are not justified? |           |         |          |            |         |             | Question 2: Why do you think more should be done? |            |          |             |          |            |
|--------------------------------------------------------------|-----------|---------|----------|------------|---------|-------------|---------------------------------------------------|------------|----------|-------------|----------|------------|
| Topic 1                                                      | Topic 2   | Topic 3 | Topic 4  | Topic 5    | Topic 6 | Topic 7     | Topic 1                                           | Topic 2    | Topic 3  | Topic 4     | Topic 5  | Topic 6    |
| Need                                                         | Case      | People  | Lockdown | Government | People  | Virus       | Health                                            | Government | Lockdown | People      | People   | Vulnerable |
| People                                                       | Rate      | Rule    | School   | Late       | Many    | Spread      | Lockdown                                          | Make       | Tier     | School      | Life     | Protect    |
| Virus                                                        | Still     | Take    | Need     | Pandemic   | Rule    | Restriction | Mental                                            | Rule       | Work     | Open        | COVID-19 | People     |
| Health                                                       | Infection | Need    | Close    | Make       | Mask    | Control     | Impact                                            | Don't      | Area     | Close       | Economy  | Risk       |
| Life                                                         | Rise      | Follow  | Work     | Seem       | Still   | Country     | Damage                                            | Think      | Case     | Restriction | Dear     | Need       |

  

| Question 3: Why do you think the government has ulterior motives? |            |         |            |            | Question 4: Why do you think the media is hiding things? |         |         |            |             |           |          |
|-------------------------------------------------------------------|------------|---------|------------|------------|----------------------------------------------------------|---------|---------|------------|-------------|-----------|----------|
| Topic 1                                                           | Topic 2    | Topic 3 | Topic 4    | Topic 5    | Topic 1                                                  | Topic 2 | Topic 3 | Topic 4    | Topic 5     | Topic 6   | Topic 7  |
| Want                                                              | Government | Economy | Brexit     | Contract   | Don't                                                    | Make    | Panic   | Medium     | Medium      | Medium    | COVID-19 |
| Don't                                                             | Decision   | Health  | Control    | Money      | Think                                                    | News    | Never   | Always     | Information | News      | People   |
| Lockdown                                                          | Political  | People  | Government | Friend     | Medium                                                   | Medium  | Medium  | Government | Truth       | Bias      | Death    |
| People                                                            | Make       | Try     | Virus      | Give       | Believe                                                  | Thing   | People  | Agenda     | Government  | Reporting | Number   |
| Government                                                        | Always     | Life    | COVID-19   | Government | Want                                                     | Self    | Story   | Control    | Want        | Fact      | Case     |

  

| Question 5: Why would you refuse COVID-19 vaccination? |         |          |         | Question 6: What do you think the real origins of COVID-19 are? |         |         |         |            |            |
|--------------------------------------------------------|---------|----------|---------|-----------------------------------------------------------------|---------|---------|---------|------------|------------|
| Topic 1                                                | Topic 2 | Topic 3  | Topic 4 | Topic 1                                                         | Topic 2 | Topic 3 | Topic 4 | Topic 5    | Topic 6    |
| Vaccine                                                | Don't   | Risk     | Effect  | Health                                                          | Make    | Animal  | China   | Chinese    | Virus      |
| Test                                                   | Vaccine | Vaccine  | Long    | Animal                                                          | Don't   | Eat     | Market  | Laboratory | Experiment |
| Rush                                                   | Know    | Need     | Term    | Natural                                                         | Know    | Market  | Poor    | Escape     | Go         |
| Wait                                                   | Need    | Virus    | Enough  | Virus                                                           | Think   | People  | Hygiene | Release    | Think      |
| Sure                                                   | Take    | COVID-19 | Side    | Sure                                                            | Come    | Human   | Food    | Virus      | Wrong      |

**Top 5 words per topic.** Top 5 words are presented for each of the free text questions assessed.

Fig S6.

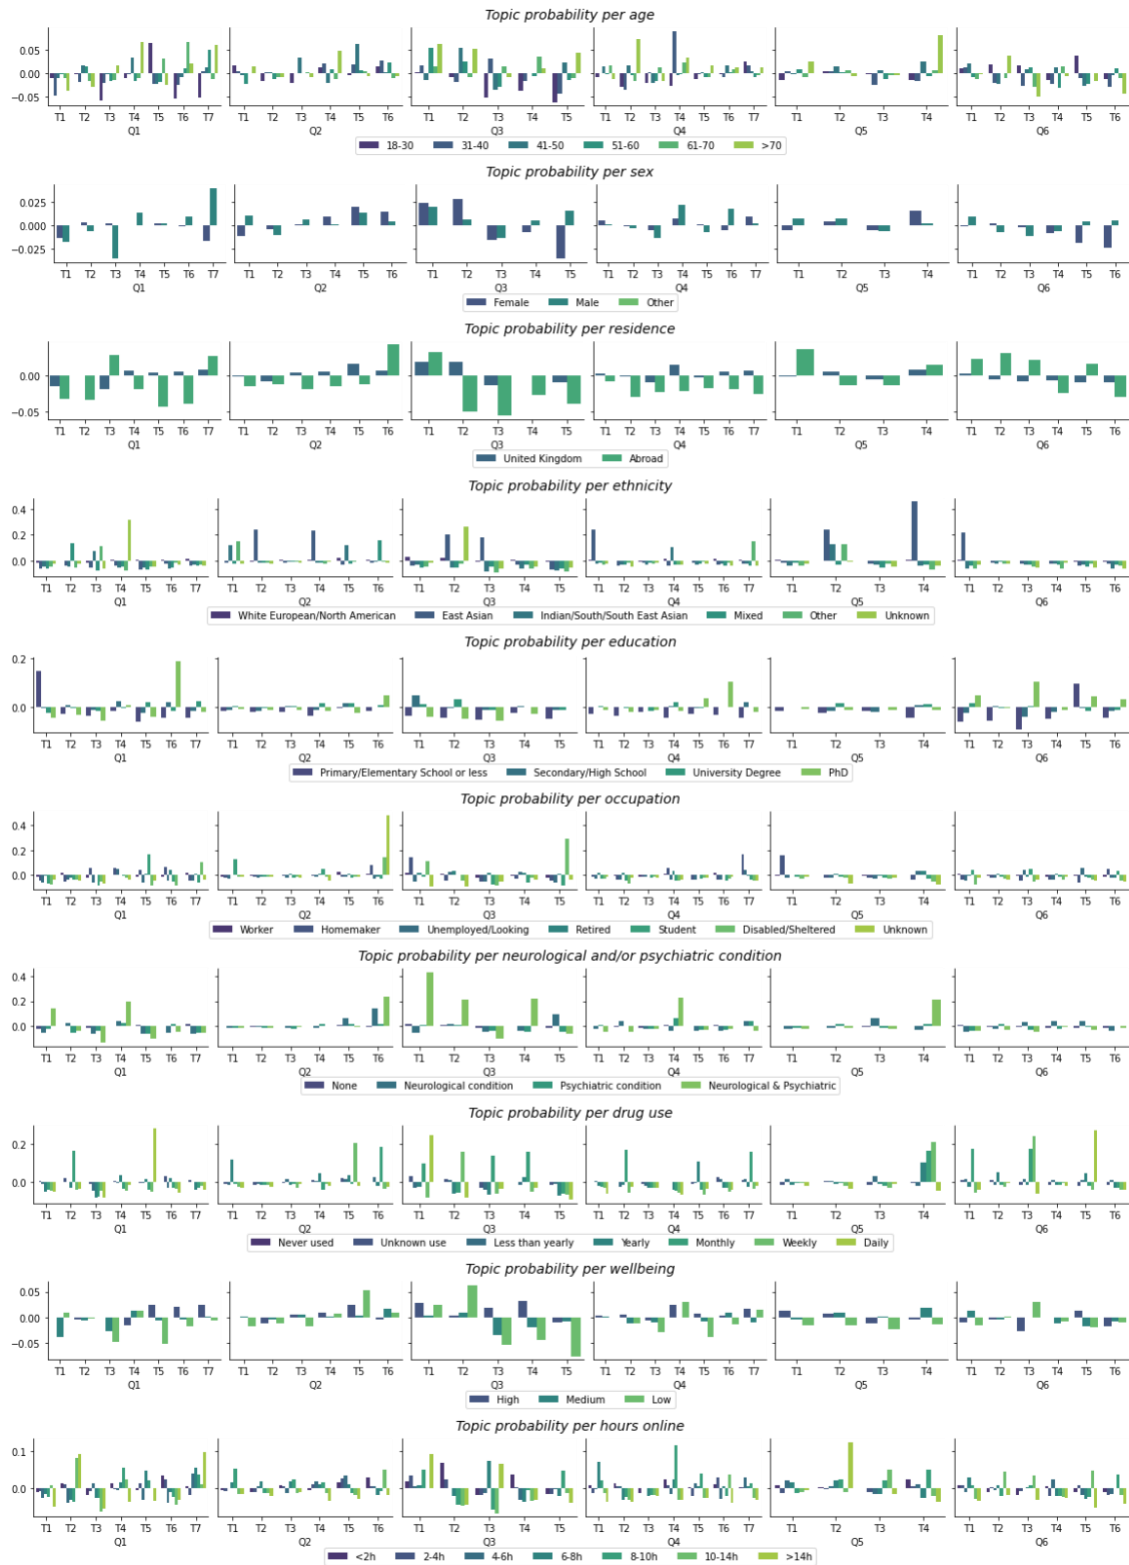

Probability changes of different topics in different sociodemographics from December 2020 to June 2021

Fig S7.

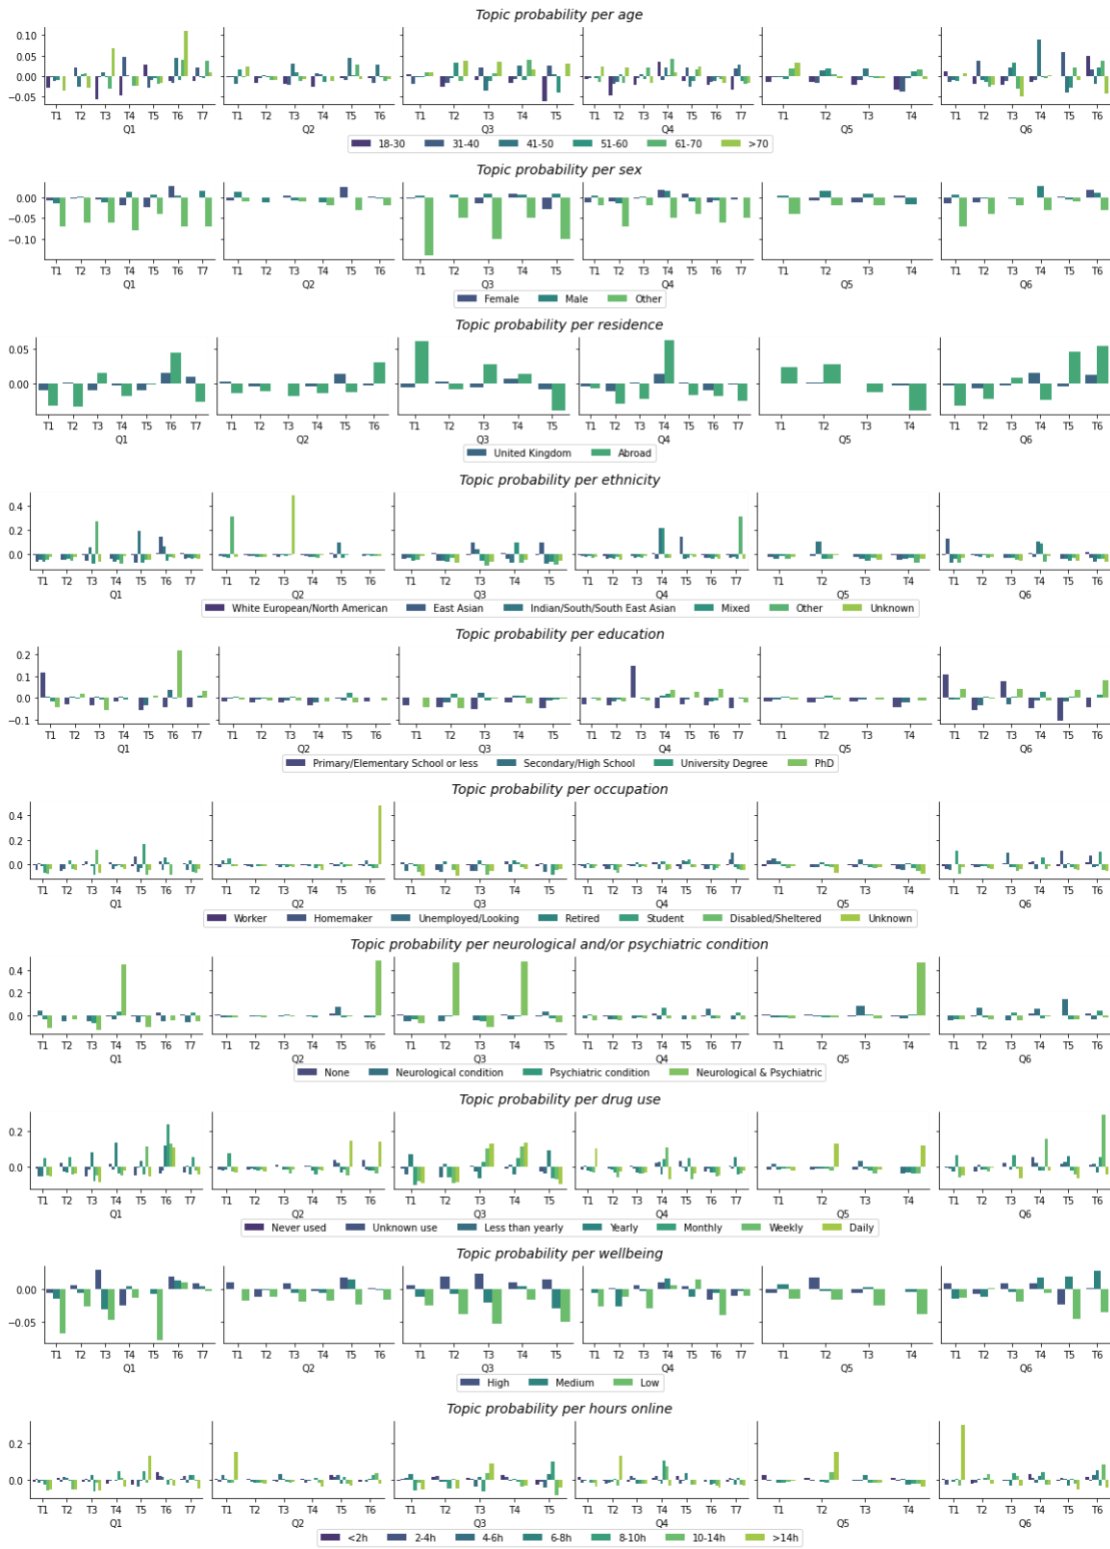

Probability changes of different topics in different sociodemographics from December 2020 to January 2022



**Table S1.**

| Factor           | Value          | % Dec 2020 | N Dec 2020 | % June 2021 | N June 2021 | N Jan 2022 | % Jan 2022 | $\chi^2$ | p-value |
|------------------|----------------|------------|------------|-------------|-------------|------------|------------|----------|---------|
| <b>Age</b>       | 51 to 60       | 24.0       | 4965       | 24.4        | 3101        | 25.3       | 3541       | 86.03    | ***     |
|                  | 61 to 70       | 21.3       | 4422       | 22.3        | 2825        | 21.8       | 3056       |          |         |
|                  | 41 to 50       | 17.2       | 3555       | 17.5        | 2224        | 18.7       | 2627       |          |         |
|                  | 18 to 30       | 14.7       | 3053       | 13.7        | 1739        | 12.5       | 1754       |          |         |
|                  | 31 to 40       | 14.7       | 3048       | 14.5        | 1845        | 15.3       | 2144       |          |         |
|                  | Above 70       | 8.1        | 1677       | 7.6         | 960         | 6.4        | 899        |          |         |
| <b>Sex</b>       | Female         | 50.9       | 10645      | 52.2        | 6682        | 53.1       | 7484       | 18.62    | ***     |
|                  | Male           | 48.6       | 10172      | 47.3        | 6051        | 46.5       | 6548       |          |         |
|                  | Other          | 0.5        | 105        | 0.5         | 63          | 0.4        | 58         |          |         |
| <b>Residence</b> | United Kingdom | 93.4       | 19551      | 96.2        | 12305       | 95.8       | 13493      | 153.67   | ***     |

|                  |                                         |      |       |      |       |      |       |       |      |
|------------------|-----------------------------------------|------|-------|------|-------|------|-------|-------|------|
|                  | Abroad                                  | 6.6  | 1371  | 3.8  | 491   | 4.2  | 597   |       |      |
| <b>Ethnicity</b> | White European or North American        | 90.7 | 18978 | 92.3 | 11807 | 91.7 | 12914 | 37.22 | ***  |
|                  | Indian, South Asian or South-East Asian | 2.1  | 443   | 1.7  | 216   | 1.8  | 253   |       |      |
|                  | Mixed ethnicity                         | 2.1  | 443   | 1.9  | 240   | 1.9  | 266   |       |      |
|                  | East Asian                              | 1.9  | 407   | 1.7  | 213   | 2.1  | 296   |       |      |
|                  | American Hispanic                       | 1.7  | 358   | 1.4  | 178   | 1.4  | 204   |       |      |
|                  | Other                                   | 0.8  | 160   | 0.5  | 70    | 0.6  | 88    |       |      |
|                  | Unknown                                 | 0.6  | 133   | 0.6  | 72    | 0.5  | 69    |       |      |
| <b>Education</b> | University degree                       | 61.4 | 12836 | 61.5 | 7869  | 62.4 | 8791  | 8.40  | 0.21 |
|                  | Secondary school/High school diploma    | 32.1 | 6721  | 32.3 | 4132  | 31.1 | 4376  |       |      |

|                   |                                              |      |       |      |      |      |      |        |     |
|-------------------|----------------------------------------------|------|-------|------|------|------|------|--------|-----|
|                   | PhD                                          | 5.0  | 1040  | 4.8  | 620  | 5.1  | 718  |        |     |
|                   | Primary/Elementary school or less            | 1.6  | 325   | 1.4  | 175  | 1.5  | 205  |        |     |
| <b>Occupation</b> | Worker                                       | 60.4 | 12629 | 60.5 | 7737 | 62.8 | 8854 | 111.90 | *** |
|                   | Retired                                      | 26.1 | 5463  | 27.6 | 3533 | 25.8 | 3642 |        |     |
|                   | Student                                      | 6.3  | 1324  | 5.4  | 693  | 4.5  | 637  |        |     |
|                   | Unemployed/Looking for work                  | 3.3  | 682   | 2.7  | 343  | 2.7  | 375  |        |     |
|                   | Homemaker                                    | 2.4  | 502   | 2.6  | 331  | 2.9  | 409  |        |     |
|                   | Disabled/Not applicable/Sheltered employment | 1.1  | 225   | 1.0  | 131  | 1.0  | 140  |        |     |
|                   | Unknown                                      | 0.5  | 97    | 0.2  | 28   | 0.2  | 33   |        |     |

|                                                                 |                                                        |      |       |      |       |      |       |         |     |
|-----------------------------------------------------------------|--------------------------------------------------------|------|-------|------|-------|------|-------|---------|-----|
| <b>Presence of a neuropsychiatric or neurological condition</b> | None                                                   | 87.7 | 18247 | 86.8 | 11062 | 86.4 | 12149 | 44.98   | *** |
|                                                                 | I have a psychiatric condition                         | 8.8  | 1823  | 9.0  | 1143  | 8.5  | 1199  |         |     |
|                                                                 | I have a neurological condition                        | 2.9  | 614   | 3.5  | 443   | 4.1  | 578   |         |     |
|                                                                 | I have both a psychiatric and a neurological condition | 0.6  | 133   | 0.7  | 93    | 0.9  | 129   |         |     |
| <b>Drug use</b>                                                 | Never used                                             | 52.9 | 11061 | 24.1 | 3088  | 24.1 | 3088  | 7058.92 | *** |
|                                                                 | Unknown use                                            | 29.0 | 6062  | 49.3 | 6313  | 49.3 | 6313  |         |     |
|                                                                 | Less than yearly                                       | 10.0 | 2101  | 19.6 | 2504  | 19.6 | 2504  |         |     |
|                                                                 | Yearly                                                 | 4.0  | 843   | 3.1  | 402   | 3.1  | 402   |         |     |
|                                                                 | Monthly                                                | 1.8  | 386   | 1.9  | 238   | 1.9  | 238   |         |     |
|                                                                 | Weekly                                                 | 1.1  | 240   | 1.0  | 131   | 1.0  | 131   |         |     |

|                            |                     |     |      |       |      |      |      |      |         |     |
|----------------------------|---------------------|-----|------|-------|------|------|------|------|---------|-----|
|                            | Daily               |     | 1.1  | 229   | 0.9  | 120  | 0.9  | 120  |         |     |
| <b>Level of wellbeing</b>  | High wellbeing      |     | 58.8 | 12193 | 35.4 | 4527 | 34.7 | 4889 | 2681.64 | *** |
|                            | Medium wellbeing    |     | 34.2 | 7089  | 52.9 | 6773 | 54.5 | 7671 |         |     |
|                            | Low wellbeing       |     | 7.0  | 1448  | 11.7 | 1493 | 10.8 | 1528 |         |     |
| <b>Time per day online</b> | Between 2h and 4h   | 2h  | 32.4 | 6689  | 31.0 | 3953 | 32.0 | 4508 | 117.03  | *** |
|                            | Less than 2h        |     | 21.5 | 4448  | 24.2 | 3088 | 22.5 | 3163 |         |     |
|                            | Between 4h and 6h   | 4h  | 19.6 | 4048  | 17.1 | 2179 | 18.0 | 2538 |         |     |
|                            | Between 6h and 8h   | 6h  | 11.9 | 2465  | 11.5 | 1468 | 11.0 | 1544 |         |     |
|                            | Between 8h and 10h  | 8h  | 7.9  | 1626  | 9.6  | 1222 | 9.5  | 1331 |         |     |
|                            | Between 10h and 14h | 10h | 4.8  | 987   | 5.1  | 654  | 5.4  | 757  |         |     |
|                            |                     |     |      |       |      |      |      |      |         |     |

More than 1.9 400 1.5 191 1.7 236  
14h

**Participant Demographics.** Demographics of participants surveyed at the different timepoints are presented alongside chi-squared statistics ( $\chi^2$ ). Significance stars for  $\chi^2$  analysis with \* indicating  $p < 0.05$ , \*\* indicating  $p < 0.01$ , and \*\*\* indicating  $p < 0.001$ .

Table S6.

|                              | Divergence from<br>popular opinion<br>(1) | Non-Compliance<br>(2) |
|------------------------------|-------------------------------------------|-----------------------|
| Intercept                    | 0.01<br>(0.02)                            | -0.18***<br>(0.02)    |
| Age 18-30                    | 0.27***<br>(0.02)                         | 0.19***<br>(0.02)     |
| Age 31-40                    | 0.11***<br>(0.02)                         | 0.12***<br>(0.02)     |
| Age 41-50                    | 0.06***<br>(0.01)                         | 0.04***<br>(0.01)     |
| Age 61-70                    | -0.02*<br>(0.01)                          | -0.15***<br>(0.01)    |
| Age above 70                 | -0.05**<br>(0.02)                         | -0.30***<br>(0.02)    |
| Sex Male                     | -0.05***<br>(0.01)                        | 0.12***<br>(0.01)     |
| Sex Other                    | 0.06<br>(0.07)                            | -0.07<br>(0.07)       |
| Residence Abroad             | -0.05**<br>(0.02)                         | -0.05**<br>(0.02)     |
| Ethnicity East Asian         | 0.07**<br>(0.03)                          | -0.01<br>(0.03)       |
| Ethnicity Indian/South Asian | 0.19***<br>(0.03)                         | -0.04<br>(0.03)       |
| Ethnicity Mixed              | 0.07**<br>(0.03)                          | 0.08**<br>(0.03)      |
| Ethnicity Other              | 0.12**<br>(0.06)                          | 0.09<br>(0.06)        |
| Ethnicity Unknown            | 0.11*<br>(0.06)                           | 0.06<br>(0.06)        |

|                                                  |                    |                    |
|--------------------------------------------------|--------------------|--------------------|
| Education PhD                                    | -0.12***<br>(0.02) | -0.12***<br>(0.02) |
| Education Primary/Less                           | 0.34***<br>(0.04)  | 0.09**<br>(0.04)   |
| Education Secondary/HighSchool                   | 0.14***<br>(0.01)  | 0.04***<br>(0.01)  |
| Occupation Homemaker                             | -0.02<br>(0.04)    | -0.04<br>(0.04)    |
| Occupation Retired                               | 0.00<br>(0.01)     | 0.01<br>(0.01)     |
| Occupation Student                               | -0.03<br>(0.03)    | -0.01<br>(0.03)    |
| Occupation Unemployed                            | 0.03<br>(0.04)     | 0.02<br>(0.04)     |
| Occupation Unknown                               | 0.40***<br>(0.13)  | 0.04<br>(0.13)     |
| Occupation Disabled or N/A                       | 0.08<br>(0.06)     | -0.32***<br>(0.06) |
| Neurological condition present                   | 0.09***<br>(0.03)  | -0.19***<br>(0.03) |
| Psychiatric condition present                    | 0.03**<br>(0.02)   | -0.14***<br>(0.02) |
| Both neurological&psychiatric conditions present | 0.18***<br>(0.05)  | -0.32***<br>(0.05) |
| Substance use Unknown                            | -0.02**<br>(0.01)  | 0.08***<br>(0.01)  |
| Substance use Less than yearly                   | 0.05***<br>(0.01)  | 0.10***<br>(0.01)  |
| Substance use Yearly                             | 0.07***<br>(0.03)  | 0.20***<br>(0.03)  |
| Substance use Monthly                            | 0.13***<br>(0.03)  | 0.31***<br>(0.03)  |
| Substance use Weekly                             | 0.18***<br>(0.04)  | 0.33***<br>(0.04)  |
| Substance use Daily                              | 0.33***<br>(0.04)  | 0.24***<br>(0.04)  |
| Medium mood                                      | -0.13***<br>(0.01) | 0.13***<br>(0.01)  |

|                     |                                      |                            |
|---------------------|--------------------------------------|----------------------------|
| Low mood            | -0.20***<br>(0.01)                   | 0.22***<br>(0.01)          |
| Time online <2h     | -0.02*<br>(0.01)                     | 0.07***<br>(0.01)          |
| Time online 4-6h    | -0.00<br>(0.01)                      | -0.05***<br>(0.01)         |
| Time online 6-8h    | 0.02<br>(0.02)                       | -0.11***<br>(0.02)         |
| Time online 8-10h   | 0.00<br>(0.02)                       | -0.18***<br>(0.02)         |
| Time online 10-14h  | 0.08***<br>(0.02)                    | -0.24***<br>(0.02)         |
| Time online >14h    | 0.07**<br>(0.04)                     | -0.12***<br>(0.04)         |
| Observations        | 46,954                               | 46,954                     |
| R2                  | 0.04                                 | 0.04                       |
| Adjusted R2         | 0.04                                 | 0.04                       |
| Residual Std. Error | 0.98 (df=46914)                      | 0.98 (df=46914)            |
| F Statistic         | 45.27*** (df=39;<br>46914)           | 52.53*** (df=39;<br>46914) |
| Note:               | \n *p<0.1;\n **p<0.05;\n ***p<0.01\n |                            |

Regression outputs of predicting scepticism and non-compliance from sociodemographic characteristics.



**Table S2. (separate file)**

Probabilities of answering questions about beliefs, compliance and media sources based on sociodemographic factors at the different timepoints.

**TableS5. (separate file)**

Chi-squared statistics per topic covary with sociodemographic factors.
